# Supplementary material for: Spiromyrrhenes A–D: unprecedented diterpene–sesquiterpene heterodimers as intermolecular [4 + 2] cycloaddition products from Resina Commiphora that inhibit tumor stemness in esophageal cancer
Source: Royal Society of Chemistry journal article supplement (doi:10.1039/d0qo00656d), 2020-01-01
Supplement: d0qo00656d1.pdf [file d0qo00656d1.pdf]

## Supporting Information

### **Spiromyrrhenes A–D: Unprecedented Diterpene-Sesquiterpene Heterodimers as intermolecular [4+2] cycloaddition products from *Resina Commiphora* That Inhibit Tumor Stemness in Esophageal Cancer**

Bin-Yuan Hu,<sup>#</sup> Shao-Xiang Wang,<sup>#</sup> Yong-Ming Yan, Jia-Wang Liu, Da-Peng Qin, and Yong-Xian Cheng\*

School of Pharmaceutical Sciences, Shenzhen University Health Science Center, Shenzhen, 518060, PR China

<sup>#</sup>These authors contributed equally to this work.

## Table of Contents

|                                                                                                                                                                                                                                                                |    |
|----------------------------------------------------------------------------------------------------------------------------------------------------------------------------------------------------------------------------------------------------------------|----|
| <b>Figure S1.</b> Key ROESY correlations of <b>1</b> .....                                                                                                                                                                                                     | 5  |
| <b>Figure S2.</b> Key $^1\text{H}$ - $^1\text{H}$ COSY, HMBC, and ROESY correlations of <b>3</b> .....                                                                                                                                                         | 5  |
| <b>Figure S3.</b> Five model compounds designed for the quantum chemical NMR calculation of compounds <b>1</b> , <b>2</b> , <b>3a</b> , <b>3b</b> and <b>4</b> . ....                                                                                          | 5  |
| <b>Figure S4.</b> The lowest energy conformers of <b>1</b> (the relative populations are in parentheses). 6                                                                                                                                                    |    |
| <b>Figure S5.</b> The lowest energy conformers of <b>2</b> (the relative populations are in parentheses). 6                                                                                                                                                    |    |
| <b>Figure S6.</b> The lowest energy conformers of <b>3a</b> and <b>3b</b> (the relative populations are in parentheses).....                                                                                                                                   | 7  |
| <b>Figure S7.</b> The lowest energy conformers of <b>4</b> (the relative populations are in parentheses). 8                                                                                                                                                    |    |
| <b>Table S1.</b> Extracted heats and weighting factors of the optimized conformers and the cartesian coordinates for <b>1</b> , <b>2</b> , <b>3a</b> , <b>3b</b> and <b>4</b> . ....                                                                           | 9  |
| <b>Figure S8.</b> Linear correlation between the experimental and calculated $^{13}\text{C}$ NMR chemical shifts of compounds <b>3a</b> (a), <b>3b</b> (b), and <b>4</b> (c). ....                                                                             | 31 |
| <b>Table S2.</b> DP4+ analysis results of <b>3a</b> (isomer1) and <b>3b</b> (Isomer 2).....                                                                                                                                                                    | 32 |
| <b>Figure S9.</b> Experimental ECD curve of <b>3</b> together with calculated ECD spectra of <b>3a</b> and <i>ent</i> - <b>3a</b> (a). Experimental ECD curve of <b>4</b> together with calculated ECD spectra of <b>4</b> and <i>ent</i> - <b>4</b> (b). .... | 33 |
| <b>Table S3.</b> $\text{IC}_{50}$ values for <b>1</b> , <b>2</b> and <b>3</b> on ECs and ECSCs .....                                                                                                                                                           | 33 |
| <b>Figure S10.</b> $^1\text{H}$ NMR (800 MHz) spectrum of compound <b>1</b> in $\text{CDCl}_3$ . ....                                                                                                                                                          | 34 |
| <b>Figure S11.</b> The part of $^1\text{H}$ NMR (800 MHz) spectrum of compound <b>1</b> in $\text{CDCl}_3$ .....                                                                                                                                               | 34 |
| <b>Figure S12.</b> $^{13}\text{C}$ NMR (200 MHz) and DEPT spectra of compound <b>1</b> in $\text{CDCl}_3$ .....                                                                                                                                                | 35 |
| <b>Figure S13.</b> $^1\text{H}$ - $^1\text{H}$ COSY spectrum of compound <b>1</b> in $\text{CDCl}_3$ .....                                                                                                                                                     | 35 |
| <b>Figure S14.</b> The part of $^1\text{H}$ - $^1\text{H}$ COSY spectrum of compound <b>1</b> in $\text{CDCl}_3$ (1). ....                                                                                                                                     | 36 |
| <b>Figure S15.</b> The part of $^1\text{H}$ - $^1\text{H}$ COSY spectrum of compound <b>1</b> in $\text{CDCl}_3$ (2). ....                                                                                                                                     | 36 |
| <b>Figure S16.</b> HSQC spectrum of compound <b>1</b> in $\text{CDCl}_3$ .....                                                                                                                                                                                 | 37 |
| <b>Figure S17.</b> The part of HSQC spectrum of compound <b>1</b> in $\text{CDCl}_3$ . ....                                                                                                                                                                    | 37 |
| <b>Figure S18.</b> HMBC spectrum of compound <b>1</b> in $\text{CDCl}_3$ .....                                                                                                                                                                                 | 38 |
| <b>Figure S22.</b> The part of HMBC spectrum of compound <b>1</b> in $\text{CDCl}_3$ (3). ....                                                                                                                                                                 | 40 |
| <b>Figure S25.</b> The part of ROESY spectrum of compound <b>1</b> in $\text{CDCl}_3$ (2).....                                                                                                                                                                 | 41 |
| <b>Figure S26.</b> HRESIMS of compound <b>1</b> . ....                                                                                                                                                                                                         | 42 |

|                                                                                                                             |    |
|-----------------------------------------------------------------------------------------------------------------------------|----|
| <b>Figure S27.</b> HPLC chromatogram of compound <b>1</b> . .....                                                           | 42 |
| <b>Figure S28.</b> $^1\text{H}$ NMR (800 MHz) spectrum of compound <b>2</b> in $\text{CDCl}_3$ .....                        | 42 |
| <b>Figure S29.</b> The part of $^1\text{H}$ NMR (800 MHz) spectrum of compound <b>2</b> in $\text{CDCl}_3$ .....            | 43 |
| <b>Figure S30.</b> $^{13}\text{C}$ NMR (200 MHz) and DEPT spectra of compound <b>2</b> in $\text{CDCl}_3$ .....             | 43 |
| <b>Figure S31.</b> $^1\text{H}$ - $^1\text{H}$ COSY spectrum of compound <b>2</b> in $\text{CDCl}_3$ .....                  | 44 |
| <b>Figure S32.</b> The part of $^1\text{H}$ - $^1\text{H}$ COSY spectrum of compound <b>2</b> in $\text{CDCl}_3$ (1). ..... | 44 |
| <b>Figure S33.</b> The part of $^1\text{H}$ - $^1\text{H}$ COSY spectrum of compound <b>2</b> in $\text{CDCl}_3$ (2). ..... | 45 |
| <b>Figure S34.</b> HSQC spectrum of compound <b>2</b> in $\text{CDCl}_3$ .....                                              | 45 |
| <b>Figure S35.</b> The part of HSQC spectrum of compound <b>2</b> in $\text{CDCl}_3$ . .....                                | 46 |
| <b>Figure S36.</b> HMBC spectrum of compound <b>2</b> in $\text{CDCl}_3$ .....                                              | 46 |
| <b>Figure S37.</b> The part of HMBC spectrum of compound <b>2</b> in $\text{CDCl}_3$ (1). .....                             | 47 |
| <b>Figure S38.</b> The part of HMBC spectrum of compound <b>2</b> in $\text{CDCl}_3$ (2). .....                             | 47 |
| <b>Figure S39.</b> The part of HMBC spectrum of compound <b>2</b> in $\text{CDCl}_3$ (3). .....                             | 48 |
| <b>Figure S40.</b> The part of HMBC spectrum of compound <b>2</b> in $\text{CDCl}_3$ (4). .....                             | 48 |
| <b>Figure S41.</b> ROESY spectrum of compound <b>2</b> in $\text{CDCl}_3$ . .....                                           | 49 |
| <b>Figure S42.</b> The part of ROESY spectrum of compound <b>2</b> in $\text{CDCl}_3$ (1). .....                            | 49 |
| <b>Figure S43.</b> The part of ROESY spectrum of compound <b>2</b> in $\text{CDCl}_3$ (2). .....                            | 50 |
| <b>Figure S44.</b> HRESIMS of compound <b>2</b> . .....                                                                     | 51 |
| <b>Figure S45.</b> HPLC chromatogram of compound <b>2</b> . .....                                                           | 51 |
| <b>Figure S46.</b> $^1\text{H}$ NMR (800 MHz) spectrum of compound <b>3</b> in $\text{CDCl}_3$ . .....                      | 52 |
| <b>Figure S47.</b> The part of $^1\text{H}$ NMR (800 MHz) spectrum of compound <b>3</b> in $\text{CDCl}_3$ .....            | 52 |
| <b>Figure S48.</b> $^{13}\text{C}$ NMR (200 MHz) and DEPT spectra of compound <b>3</b> in $\text{CDCl}_3$ .....             | 53 |
| <b>Figure S49.</b> $^1\text{H}$ - $^1\text{H}$ COSY spectrum of compound <b>3</b> in $\text{CDCl}_3$ .....                  | 53 |
| <b>Figure S50.</b> The part of $^1\text{H}$ - $^1\text{H}$ COSY spectrum of compound <b>3</b> in $\text{CDCl}_3$ (1). ..... | 54 |
| <b>Figure S51.</b> The part of $^1\text{H}$ - $^1\text{H}$ COSY spectrum of compound <b>3</b> in $\text{CDCl}_3$ (2). ..... | 54 |
| <b>Figure S52.</b> HSQC spectrum of compound <b>3</b> in $\text{CDCl}_3$ .....                                              | 55 |
| <b>Figure S53.</b> The part of HSQC spectrum of compound <b>3</b> in $\text{CDCl}_3$ . .....                                | 55 |
| <b>Figure S54.</b> HMBC spectrum of compound <b>3</b> in $\text{CDCl}_3$ .....                                              | 56 |
| <b>Figure S55.</b> The part of HMBC spectrum of compound <b>3</b> in $\text{CDCl}_3$ (1). .....                             | 56 |
| <b>Figure S56.</b> The part of HMBC spectrum of compound <b>3</b> in $\text{CDCl}_3$ (2). .....                             | 57 |

|                                                                                                                            |    |
|----------------------------------------------------------------------------------------------------------------------------|----|
| <b>Figure S57.</b> The part of HMBC spectrum of compound <b>3</b> in CDCl <sub>3</sub> (3).                                | 57 |
| <b>Figure S58.</b> The part of HMBC spectrum of compound <b>3</b> in CDCl <sub>3</sub> (3).                                | 58 |
| <b>Figure S59.</b> ROESY spectrum of compound <b>3</b> in CDCl <sub>3</sub> .                                              | 58 |
| <b>Figure S60.</b> The part of ROESY spectrum of compound <b>3</b> in CDCl <sub>3</sub> (1).                               | 59 |
| <b>Figure S61.</b> The part of ROESY spectrum of compound <b>3</b> in CDCl <sub>3</sub> (2).                               | 59 |
| <b>Figure S62.</b> The part of ROESY spectrum of compound <b>3</b> in CDCl <sub>3</sub> (3).                               | 60 |
| <b>Figure S63.</b> HRESIMS of compound <b>3</b> .                                                                          | 60 |
| <b>Figure S64.</b> HPLC chromatogram of compound <b>3</b> .                                                                | 60 |
| <b>Figure S65.</b> <sup>1</sup> H NMR (800 MHz) spectrum of compound <b>4</b> in CDCl <sub>3</sub> .                       | 61 |
| <b>Figure S66.</b> <sup>1</sup> H NMR (800 MHz) spectrum of compound <b>4</b> in CDCl <sub>3</sub> .                       | 61 |
| <b>Figure S67.</b> <sup>13</sup> C NMR (200 MHz) and DEPT spectra of compound <b>4</b> in CDCl <sub>3</sub> .              | 62 |
| <b>Figure S68.</b> <sup>1</sup> H- <sup>1</sup> H COSY spectrum of compound <b>4</b> in CDCl <sub>3</sub> .                | 62 |
| <b>Figure S69.</b> The part of <sup>1</sup> H- <sup>1</sup> H COSY spectrum of compound <b>4</b> in CDCl <sub>3</sub> (1). | 63 |
| <b>Figure S70.</b> The part of <sup>1</sup> H- <sup>1</sup> H COSY spectrum of compound <b>4</b> in CDCl <sub>3</sub> (2). | 63 |
| <b>Figure S71.</b> HSQC spectrum of compound <b>4</b> in CDCl <sub>3</sub> .                                               | 64 |
| <b>Figure S72.</b> The part of HSQC spectrum of compound <b>4</b> in CDCl <sub>3</sub> .                                   | 64 |
| <b>Figure S73.</b> HMBC spectrum of compound <b>4</b> in CDCl <sub>3</sub> .                                               | 65 |
| <b>Figure S74.</b> The part of HMBC spectrum of compound <b>4</b> in CDCl <sub>3</sub> (1).                                | 65 |
| <b>Figure S75.</b> The part of HMBC spectrum of compound <b>4</b> in CDCl <sub>3</sub> (2).                                | 66 |
| <b>Figure S76.</b> The part of HMBC spectrum of compound <b>4</b> in CDCl <sub>3</sub> (3).                                | 66 |
| <b>Figure S77.</b> ROESY spectrum of compound <b>4</b> in CDCl <sub>3</sub> .                                              | 67 |
| <b>Figure S78.</b> The part of ROESY spectrum of compound <b>4</b> in CDCl <sub>3</sub> (1).                               | 67 |
| <b>Figure S79.</b> The part of ROESY spectrum of compound <b>4</b> in CDCl <sub>3</sub> (2).                               | 68 |
| <b>Figure S80.</b> The part of ROESY spectrum of compound <b>4</b> in CDCl <sub>3</sub> (3).                               | 68 |
| <b>Figure S81.</b> HRESIMS of compound <b>4</b> .                                                                          | 69 |

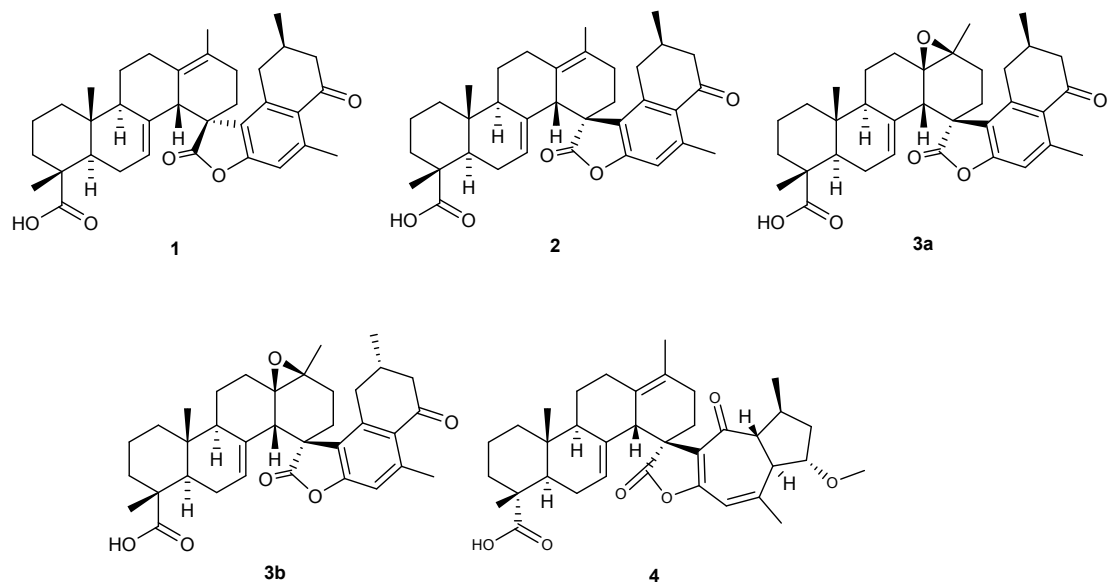

**Figure S1.** Five model compounds designed for the quantum chemical NMR calculation of compounds **1**, **2**, **3a**, **3b** and **4**.

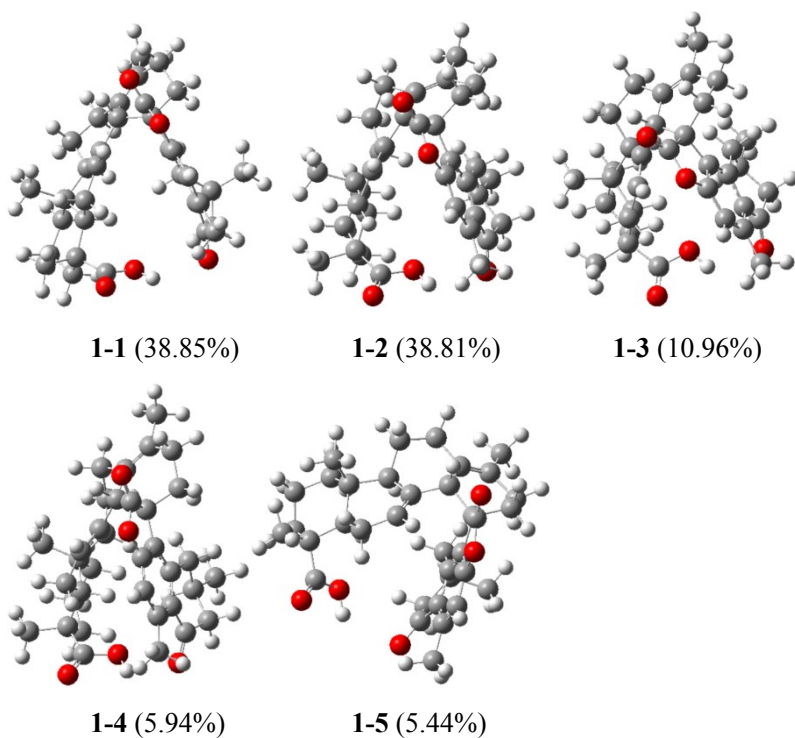

**Figure S2.** The lowest energy conformers of **1** (the relative populations are in parentheses).

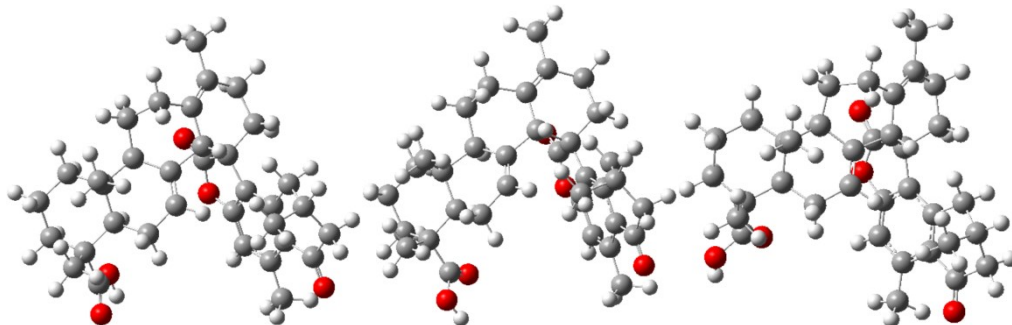

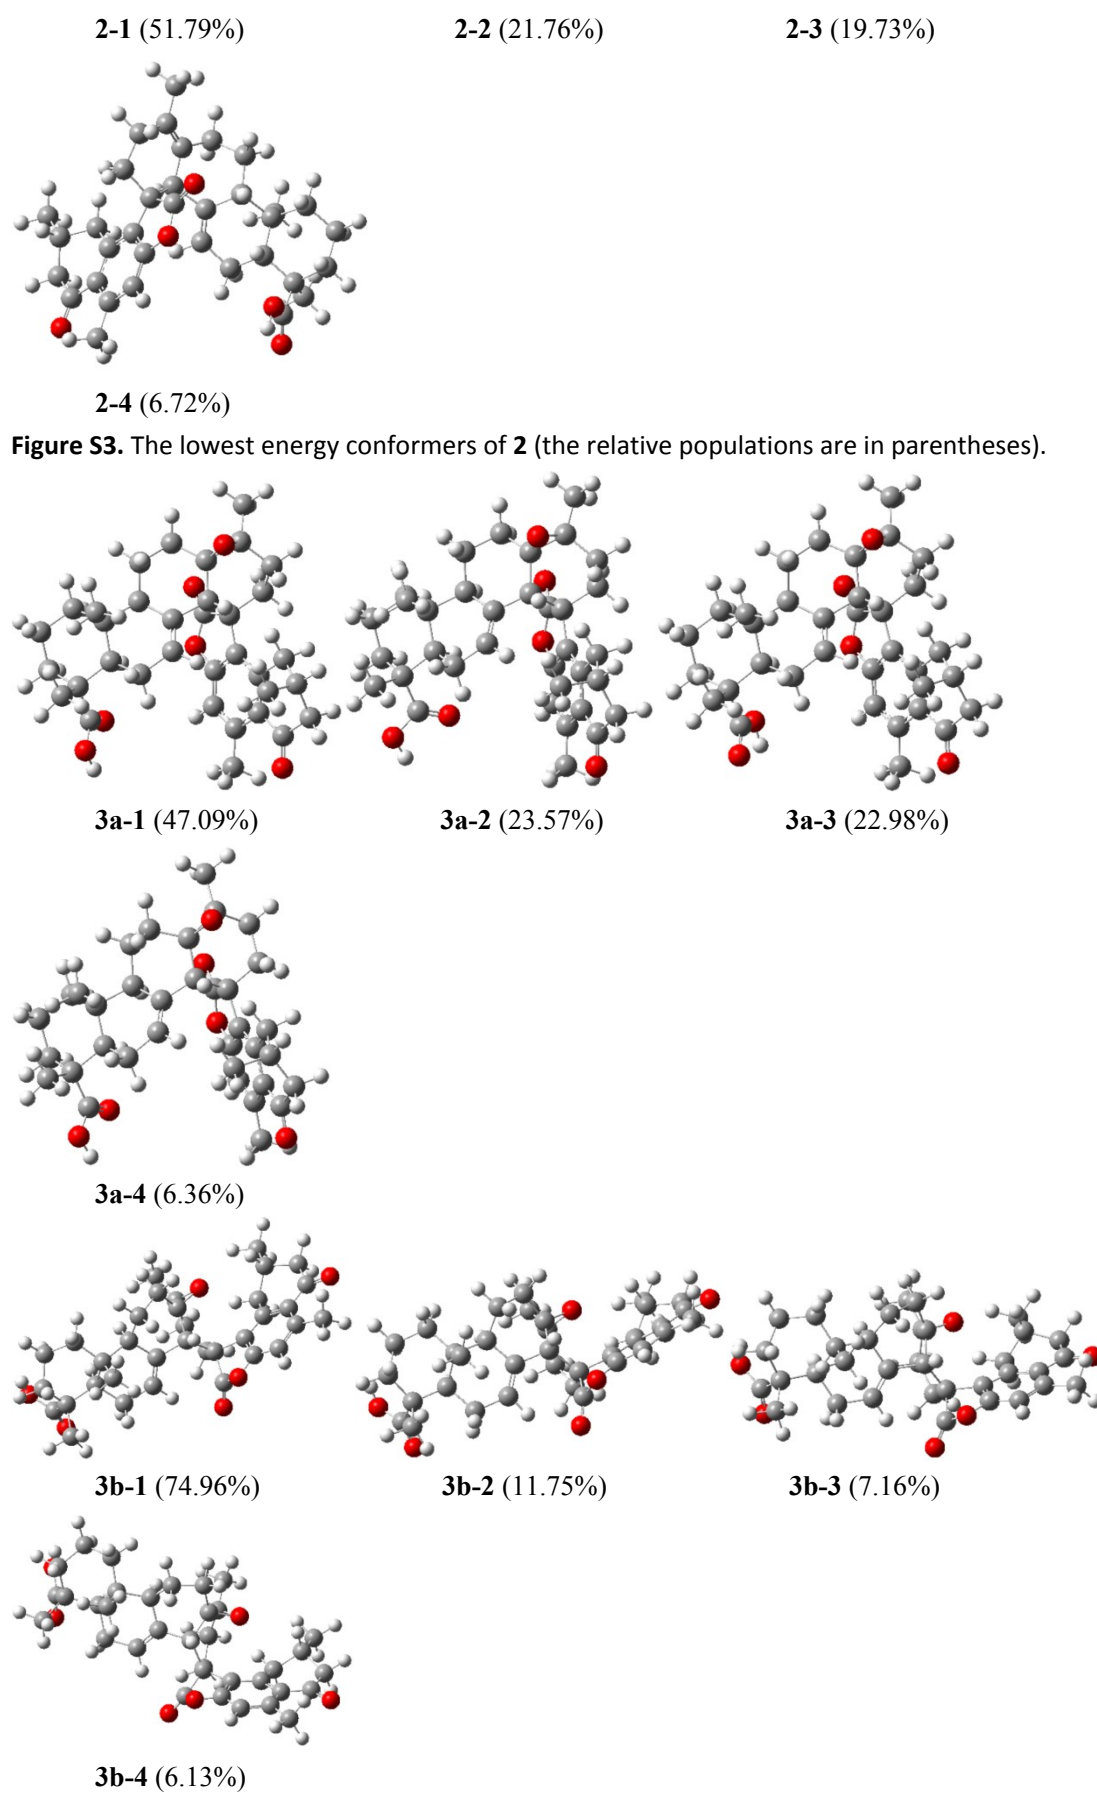

**Figure S4.** The lowest energy conformers of **3a** and **3b** (the relative populations are in parentheses).

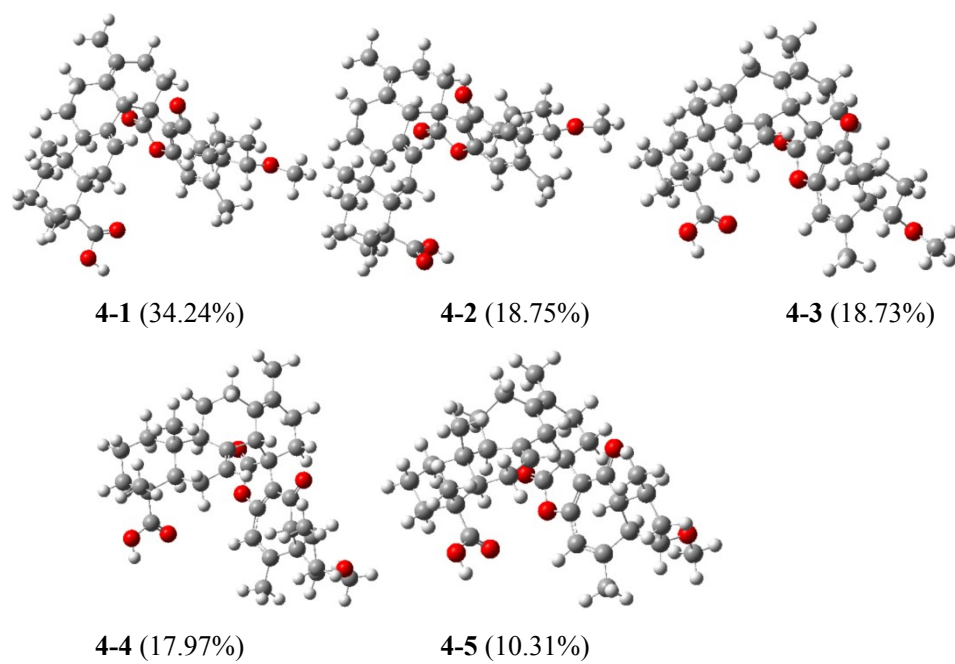

**Figure S5.** The lowest energy conformers of **4** (the relative populations are in parentheses).



**Table S1.** Extracted heats and weighting factors of the optimized conformers and the cartesian coordinates for **1**, **2**, **3a**, **3b** and **4**

|            |               | B3LYP/6-311+G(d) |                 |                                       |               |               |               |
|------------|---------------|------------------|-----------------|---------------------------------------|---------------|---------------|---------------|
|            |               | Conformer        | Extracted heats | Boltzmann-calculated contribution (%) |               |               |               |
| <b>1</b>   |               | 1                | -1735.11831655  | 38.85%                                |               |               |               |
|            |               | 2                | -1735.11830459  | 38.81%                                |               |               |               |
|            |               | 3                | -1735.11707354  | 10.96%                                |               |               |               |
|            |               | 4                | -1735.116531716 | 5.94%                                 |               |               |               |
|            |               | 5                | -1735.116483908 | 5.44%                                 |               |               |               |
| <b>2</b>   |               | 1                | -1735.12395432  | 51.79%                                |               |               |               |
|            |               | 2                | -1735.12312442  | 21.76%                                |               |               |               |
|            |               | 3                | -1735.12302682  | 19.73%                                |               |               |               |
|            |               | 4                | -1735.12200134  | 6.72%                                 |               |               |               |
| <b>3a</b>  |               | 1                | -1809.41442350  | 47.09%                                |               |               |               |
|            |               | 2                | -1809.41375388  | 23.57%                                |               |               |               |
|            |               | 3                | -1809.41370514  | 22.98%                                |               |               |               |
|            |               | 4                | -1809.41250073  | 6.36%                                 |               |               |               |
| <b>3b</b>  |               | 1                | -1809.41489078  | 74.96%                                |               |               |               |
|            |               | 2                | -1809.41314070  | 11.75%                                |               |               |               |
|            |               | 3                | -1809.41267444  | 7.16%                                 |               |               |               |
|            |               | 4                | -1809.41252898  | 6.13%                                 |               |               |               |
| <b>4</b>   |               | 1                | -1849.89166872  | 34.24%                                |               |               |               |
|            |               | 2                | -1849.89110932  | 18.75%                                |               |               |               |
|            |               | 3                | -1849.89110810  | 18.73%                                |               |               |               |
|            |               | 4                | -1849.89103819  | 17.97%                                |               |               |               |
|            |               | 5                | -1849.89054895  | 10.31%                                |               |               |               |
| <b>I-1</b> | X axis(Å)     | Y axis(Å)        | Z axis(Å)       | <b>I-2</b>                            | X axis(Å)     | Y axis(Å)     | Z axis(Å)     |
| C          | -0.7552813427 | 2.5532594242     | 2.9549851992    | C                                     | -0.8630833324 | 2.0848169514  | 3.1826439222  |
| C          | 0.6287688255  | 1.9109359709     | 3.1227282111    | C                                     | -0.2919614847 | 0.6870658457  | 2.9112026928  |
| C          | 0.8491845793  | 0.9612523324     | 1.9309328747    | C                                     | 0.9723532802  | 0.8401259641  | 2.0593498986  |
| C          | 0.7785285766  | 1.6834151812     | 0.601891705     | C                                     | 0.8082473949  | 1.6945024425  | 0.8168298663  |
| C          | -0.1399077073 | 2.7624238011     | 0.4384877325    | C                                     | -0.1778356473 | 2.7290534415  | 0.7835819826  |
| C          | -1.0850186471 | 3.0469225064     | 1.5500824995    | C                                     | -1.1798957432 | 2.7999812483  | 1.8852857541  |
| C          | 1.5606871937  | 1.2982571575     | -0.4880641229   | C                                     | 1.6296630912  | 1.505753749   | -0.3045301627 |
| C          | 1.4656616063  | 2.0459153693     | -1.6606153587   | C                                     | 1.4846210429  | 2.4050033383  | -1.3626585373 |
| C          | 0.6398900923  | 3.1417373382     | -1.8293649588   | C                                     | 0.602482341   | 3.4679120775  | -1.389730989  |
| C          | -0.2042219894 | 3.5056105001     | -0.7745580052   | C                                     | -0.2707292837 | 3.6337413024  | -0.3130885165 |
| C          | 1.7545949206  | 2.9449286389     | 3.2854976562    | C                                     | -0.0126384965 | -0.0810396402 | 4.207260495   |
| O          | -2.1552741815 | 3.6284674558     | 1.3673993811    | O                                     | -2.259392845  | 3.3762812776  | 1.7501098651  |
| C          | -1.1268323462 | 4.6831129728     | -0.9912067305   | C                                     | -1.249107243  | 4.7842312785  | -0.3851785522 |
| C          | -4.0270985422 | 0.4130599061     | -0.5855458293   | C                                     | -3.885336499  | 0.4072579657  | -0.6777302314 |
| O          | -4.6126805705 | 1.0204762185     | -1.4590203726   | O                                     | -4.4523247556 | 1.0969106129  | -1.5010925373 |
| C          | -3.9149336671 | -3.0883104524    | 1.0799216861    | C                                     | -3.6215318075 | -3.2508601697 | 0.5904790844  |

|   |               |               |               |   |               |               |               |
|---|---------------|---------------|---------------|---|---------------|---------------|---------------|
| C | -4.3901834531 | -1.6670079122 | 0.7631430632  | C | -4.1648351126 | -1.8284288592 | 0.4242219965  |
| C | -3.7802538259 | -1.1091301078 | -0.5568971291 | C | -3.5778734671 | -1.0969960825 | -0.8198664752 |
| C | -2.2161769801 | -1.3038349719 | -0.5496999904 | C | -2.0031430715 | -1.2205732028 | -0.8297052858 |
| C | -1.6352216865 | -2.6666347453 | -0.0475501993 | C | -1.3659759744 | -2.6008919595 | -0.4632646485 |
| C | -2.3895169259 | -3.1214561362 | 1.2282961549  | C | -2.0980933507 | -3.2214303158 | 0.7525794968  |
| C | -1.54453834   | -0.9199935024 | -1.8756454015 | C | -1.3500988957 | -0.6876422621 | -2.1150866035 |
| C | -0.0465847423 | -0.9771963834 | -1.7494441138 | C | 0.1506285869  | -0.691741354  | -1.9888815251 |
| C | 0.6000052908  | -1.5204841114 | -0.7071133792 | C | 0.8251371024  | -1.3303495432 | -1.0207756512 |
| C | -0.1454597883 | -2.3502059248 | 0.3325347248  | C | 0.11500679    | -2.2725310307 | -0.0459467319 |
| C | -1.695387452  | -3.7917110193 | -1.1062525896 | C | -1.4012330944 | -3.5962226728 | -1.6499105398 |
| C | -4.50254649   | -1.7203927541 | -1.772163089  | C | -4.2813604226 | -1.5924522926 | -2.0980093579 |
| C | 2.123634634   | -1.34090315   | -0.5569659777 | C | 2.3297980034  | -1.0497927878 | -0.7958496684 |
| C | 2.7798498598  | -2.0585085379 | 0.6352414974  | C | 2.8930592229  | -1.9102700677 | 0.3306886542  |
| C | 1.991943592   | -3.1282615831 | 1.3803725127  | C | 2.4714617922  | -3.3454231601 | 0.1295033084  |
| C | 0.7180677633  | -3.5783407392 | 0.6639907806  | C | 0.9478406231  | -3.5429410954 | 0.2880693528  |
| C | 4.0750789685  | -1.8102249827 | 0.920096537   | C | 3.7020976232  | -1.4674068416 | 1.3118879321  |
| C | 4.8772947129  | -2.5014190184 | 1.9944228605  | C | 4.2406349246  | -2.3186148154 | 2.4378474759  |
| C | 2.5812757585  | 0.1919309448  | -0.7245950628 | C | 2.6999822365  | 0.4877542786  | -0.7242752133 |
| C | 3.9106443841  | 0.501263726   | 0.0359920443  | C | 4.0789499709  | 0.6582189306  | -0.0116632558 |
| C | 2.9070177055  | 0.4223736201  | -2.21651983   | C | 2.9881962475  | 0.9628462785  | -2.1693016241 |
| O | 2.2763535575  | 1.5674013377  | -2.6718065847 | O | 2.2985202918  | 2.1231759386  | -2.4412413271 |
| O | 3.6182951134  | -0.2234591584 | -2.9393686813 | O | 3.7256001469  | 0.469276913   | -2.9801671488 |
| C | 4.8081747359  | -0.7323318943 | 0.1535431586  | C | 4.1830814574  | -0.0337442409 | 1.3442951624  |
| O | -3.4987557916 | 1.0416163227  | 0.495140821   | O | -3.4323493379 | 0.9159499055  | 0.4953906482  |
| H | -0.1960411904 | -1.7662709233 | 1.2656998402  | H | 0.0357924933  | -1.7176048983 | 0.90131147    |
| H | -1.8643017894 | -0.5770700388 | 0.1913162031  | H | -1.6801825316 | -0.5517872952 | -0.024126484  |
| H | 2.574608155   | -1.8170964919 | -1.4385140801 | H | 2.8529316999  | -1.4014009806 | -1.698227712  |
| H | -1.5413244001 | 1.8264270202  | 3.2017966565  | H | -1.7789832709 | 2.0527610627  | 3.7789747902  |
| H | -0.906137089  | 3.4002673208  | 3.6347331466  | H | -0.118729684  | 2.6768793284  | 3.7383622818  |
| H | 0.6096707492  | 1.2991439997  | 4.0338873317  | H | -1.0387708814 | 0.1273946903  | 2.3308814664  |
| H | 1.8006666672  | 0.4308877815  | 2.0247832297  | H | 1.7379117263  | 1.3181098187  | 2.6904067242  |
| H | 0.0691542847  | 0.1892977413  | 1.9597938229  | H | 1.371646836   | -0.1402516229 | 1.7908685796  |
| H | 0.6335387258  | 3.6858305093  | -2.7677160534 | H | 0.5740394675  | 4.1320061316  | -2.2468189936 |
| H | 1.5813341822  | 3.5651985016  | 4.1716828855  | H | -0.9274236816 | -0.2025141609 | 4.7971459154  |
| H | 1.8285431753  | 3.6131655724  | 2.4210946108  | H | 0.7188349082  | 0.449498056   | 4.8295495744  |
| H | 2.7249917968  | 2.4510221643  | 3.4099066834  | H | 0.387006099   | -1.0797121217 | 3.9980333253  |
| H | -0.8079959661 | 5.245222759   | -1.8736702006 | H | -0.9418863735 | 5.4773660077  | -1.1736716164 |
| H | -2.1588849787 | 4.3547436512  | -1.1452539872 | H | -2.2607697483 | 4.4337568699  | -0.6088617612 |
| H | -1.1484343444 | 5.3550898724  | -0.1303227658 | H | -1.3186835174 | 5.3283855292  | 0.5591307535  |
| H | -4.2452453286 | -3.7929951022 | 0.3071548297  | H | -3.9080300841 | -3.8832531889 | -0.2587591141 |
| H | -4.3809968562 | -3.4233628435 | 2.0145745422  | H | -4.0775207962 | -3.7080961185 | 1.4770718533  |
| H | -4.1057978091 | -1.0147368741 | 1.5957688356  | H | -3.9194665652 | -1.2597704061 | 1.3270436745  |
| H | -5.484174675  | -1.6305399134 | 0.6907075669  | H | -5.2588853212 | -1.837586356  | 0.3436352942  |

|            |               |               |               |            |               |               |               |
|------------|---------------|---------------|---------------|------------|---------------|---------------|---------------|
| H          | -2.0631500329 | -4.1283500933 | 1.5147222485  | H          | -1.7169115215 | -4.2331086368 | 0.9357598569  |
| H          | -2.1167563787 | -2.4568497138 | 2.0612389685  | H          | -1.8631842171 | -2.6322148515 | 1.6513675296  |
| H          | -1.8884898528 | -1.5579216097 | -2.7006951595 | H          | -1.6687594223 | -1.2602897732 | -2.9960073009 |
| H          | -1.8284874815 | 0.1017117687  | -2.1624903677 | H          | -1.6762887911 | 0.3434062851  | -2.3062831955 |
| H          | 0.5090187633  | -0.4750027957 | -2.5388172865 | H          | 0.68291451    | -0.058450913  | -2.6961308863 |
| H          | -2.7133455757 | -3.9676813152 | -1.4598757588 | H          | -2.3916150535 | -3.6488850183 | -2.1047468259 |
| H          | -1.0747266829 | -3.5700297164 | -1.9783754426 | H          | -0.6924304326 | -3.3201999459 | -2.4353898196 |
| H          | -1.3366508984 | -4.7342567371 | -0.6807096305 | H          | -1.1518453059 | -4.6096844469 | -1.3222829701 |
| H          | -4.1260513716 | -1.3215327556 | -2.7157948015 | H          | -3.9017739309 | -1.0999493869 | -2.9948767272 |
| H          | -5.5692377326 | -1.4829939043 | -1.729402006  | H          | -5.3505024463 | -1.3694759846 | -2.041230128  |
| H          | -4.3986397856 | -2.8067829732 | -1.7904762944 | H          | -4.1703689265 | -2.671320823  | -2.2211028704 |
| H          | 1.7071854038  | -2.7497569004 | 2.3745593666  | H          | 3.0091150637  | -4.0327876832 | 0.7853664942  |
| H          | 2.629867736   | -3.999361693  | 1.5616671797  | H          | 2.7555104033  | -3.6214472544 | -0.8965379708 |
| H          | 0.174492014   | -4.2756466276 | 1.3102764581  | H          | 0.7272891523  | -3.8344646542 | 1.3206764949  |
| H          | 0.9718559826  | -4.1225491341 | -0.2540966017 | H          | 0.6436652282  | -4.3830125349 | -0.3412220559 |
| H          | 4.3333335479  | -3.2909100731 | 2.5147159338  | H          | 3.7772122845  | -3.3039905592 | 2.5047444728  |
| H          | 5.7878107484  | -2.9428767458 | 1.5669356159  | H          | 5.3255183767  | -2.4604229355 | 2.3375828127  |
| H          | 5.2127573549  | -1.7770054323 | 2.7496915333  | H          | 4.0829109543  | -1.8131831849 | 3.4000025044  |
| H          | 4.4319806391  | 1.3255456485  | -0.4644529766 | H          | 4.8309882966  | 0.2212342417  | -0.6778938683 |
| H          | 3.6622299908  | 0.8531363478  | 1.0414244411  | H          | 4.3087361542  | 1.7257965698  | 0.0795177689  |
| H          | 5.7339394668  | -0.4584473635 | 0.6723598942  | H          | 3.6597624269  | 0.5308444772  | 2.1263305639  |
| H          | 5.1001524851  | -1.0803800594 | -0.846544728  | H          | 5.2395812858  | -0.0264189185 | 1.6465691867  |
| H          | -3.6195390498 | 2.0050635326  | 0.4091126225  | H          | -3.5881171688 | 1.8777382391  | 0.5228639065  |
| <b>1-3</b> | X axis(Å)     | Y axis(Å)     | Z axis(Å)     | <b>1-4</b> | X axis(Å)     | Y axis(Å)     | Z axis(Å)     |
| C          | -0.645659785  | 2.2818535866  | 3.104919452   | C          | -1.4106900973 | 2.2115619204  | 2.9945564667  |
| C          | -0.2146844618 | 0.8327775855  | 2.8447131233  | C          | -0.7258124785 | 0.8427611926  | 2.8844332132  |
| C          | 1.0628923608  | 0.8532250488  | 1.9994297467  | C          | 0.6055977585  | 1.0213518859  | 2.1475242653  |
| C          | 1.0001081193  | 1.7204313494  | 0.7568813635  | C          | 0.5235646326  | 1.8123579521  | 0.8541224778  |
| C          | 0.1239899321  | 2.8478349574  | 0.7124300571  | C          | -0.5183679124 | 2.7663052691  | 0.6462858648  |
| C          | -0.8889978968 | 3.0062352105  | 1.7971676916  | C          | -1.6406669545 | 2.8199283106  | 1.6249919229  |
| C          | 1.7951161816  | 1.4386841014  | -0.3649304038 | C          | 1.4992705506  | 1.6582614988  | -0.1377781437 |
| C          | 1.7338507117  | 2.3299340286  | -1.4370341493 | C          | 1.4792561048  | 2.5387938929  | -1.2168489615 |
| C          | 0.9735884193  | 3.4840411816  | -1.468385887  | C          | 0.5207975407  | 3.5142628656  | -1.4188979475 |
| C          | 0.1273438668  | 3.7499381507  | -0.3895754006 | C          | -0.5250858053 | 3.6182208795  | -0.4969859211 |
| C          | -0.0193626857 | 0.0489567157  | 4.146731043   | C          | -0.5312628628 | 0.1848302097  | 4.254500413   |
| O          | -1.9234231154 | 3.6526082525  | 1.6348526934  | O          | -2.7362291135 | 3.3057792457  | 1.3441200885  |
| C          | -0.7325781848 | 4.9910353629  | -0.4666890936 | C          | -1.5832067548 | 4.6647029993  | -0.7623981756 |
| C          | -3.9908336629 | 0.4870857673  | -0.4430559985 | C          | -4.0412255052 | 0.0362820019  | -0.8134517608 |
| O          | -4.6621590339 | 1.1980938662  | -1.1625408734 | O          | -4.6516511717 | 0.6031391222  | -1.6970493265 |
| C          | -3.8006691327 | -3.2549380968 | 0.5758180608  | C          | -3.4172351826 | -3.507149894  | 0.6426633638  |
| C          | -4.2844743412 | -1.8003512079 | 0.5400836603  | C          | -4.1092759055 | -2.1643439963 | 0.3890970536  |
| C          | -3.7081721893 | -1.0116400683 | -0.6728453174 | C          | -3.5412700299 | -1.421389835  | -0.855893154  |
| C          | -2.1436276663 | -1.1799799033 | -0.7107324349 | C          | -1.9674462557 | -1.3472325755 | -0.7627534966 |

|   |               |               |               |   |               |               |               |
|---|---------------|---------------|---------------|---|---------------|---------------|---------------|
| C | -1.5476799989 | -2.6117203614 | -0.5099910514 | C | -1.1907325784 | -2.6338245425 | -0.3247149249 |
| C | -2.271073108  | -3.3146829102 | 0.6680721547  | C | -1.9156316856 | -3.3012888212 | 0.8716807324  |
| C | -1.4880008828 | -0.51104693   | -1.9256870493 | C | -1.3119563582 | -0.740401399  | -2.0124171168 |
| C | 0.0111902045  | -0.5576153038 | -1.8130506475 | C | 0.1763957306  | -0.622077115  | -1.8420393281 |
| C | 0.6702985203  | -1.3152062967 | -0.925413489  | C | 0.8776512682  | -1.1704923598 | -0.8378112929 |
| C | -0.0463647975 | -2.383980083  | -0.1096280108 | C | 0.2139951052  | -2.1168962822 | 0.1683069903  |
| C | -1.6367832592 | -3.4948690435 | -1.7759110769 | C | -1.0278573053 | -3.6578796198 | -1.4715265839 |
| C | -4.4435700636 | -1.4189436214 | -1.9643665367 | C | -4.0901396392 | -2.0597900327 | -2.1461203658 |
| C | 2.197838851   | -1.1955705499 | -0.7161334971 | C | 2.3692841999  | -0.8190462709 | -0.7048043803 |
| C | 2.6921091307  | -1.9833620988 | 0.5068054124  | C | 3.1677151416  | -1.8578781507 | 0.0783724422  |
| C | 2.1364074609  | -3.4003343881 | 0.6284965386  | C | 2.5453360727  | -3.2260154417 | -0.0537356299 |
| C | 0.8409750643  | -3.6435919521 | -0.1607978367 | C | 1.1731971943  | -3.2575317342 | 0.6370586903  |
| C | 3.6090682745  | -1.5204902959 | 1.3809566995  | C | 4.332500298   | -1.5872365439 | 0.6985480004  |
| C | 4.1293881783  | -2.3026375518 | 2.5649230539  | C | 5.2353913039  | -2.60709403   | 1.349753117   |
| C | 2.7204211028  | 0.2896482559  | -0.7944999237 | C | 2.6904022025  | 0.7225306478  | -0.3236869384 |
| C | 4.1565401692  | 0.3771685092  | -0.1895043959 | C | 3.7158496579  | 0.8459368699  | 0.8355145504  |
| C | 2.9657847642  | 0.6605598723  | -2.2743987636 | C | 3.3251096898  | 1.3260042184  | -1.5962226896 |
| O | 2.4619305963  | 1.9176535297  | -2.5372999979 | O | 2.5368788236  | 2.3544434545  | -2.0844108756 |
| O | 3.5577716313  | 0.0339305095  | -3.1118104836 | O | 4.3358423575  | 1.0039926902  | -2.1619795994 |
| C | 4.2502032658  | -0.1605452137 | 1.2307204133  | C | 4.8544098087  | -0.1687937044 | 0.7567038762  |
| O | -3.3977899991 | 0.9689328792  | 0.6808100043  | O | -3.7080168117 | 0.660951228   | 0.343776733   |
| H | -0.0585964058 | -2.0559760406 | 0.9435871779  | H | -0.0102128687 | -1.5205471952 | 1.0626014062  |
| H | -1.7962038616 | -0.6215464101 | 0.1660537717  | H | -1.7858577268 | -0.6367458644 | 0.0511484172  |
| H | 2.6728922992  | -1.6870911009 | -1.5807046273 | H | 2.7614762918  | -0.9198246164 | -1.7256179225 |
| H | -1.5612125694 | 2.3448790133  | 3.6994464257  | H | -2.378136983  | 2.1504631143  | 3.5002622286  |
| H | 0.1534025578  | 2.8029331158  | 3.6555765176  | H | -0.7685660636 | 2.8920000682  | 3.5759050797  |
| H | -1.0105584437 | 0.3466749733  | 2.2637922338  | H | -1.3749404654 | 0.1951960847  | 2.2790832772  |
| H | 1.8729768672  | 1.2434753439  | 2.6355163356  | H | 1.2935356208  | 1.5582130006  | 2.8203500208  |
| H | 1.3554316892  | -0.1632592557 | 1.7326470152  | H | 1.068180054   | 0.0482077141  | 1.9643424862  |
| H | 1.0030866874  | 4.1350732703  | -2.3355158459 | H | 0.5786310541  | 4.1704047125  | -2.280575112  |
| H | -0.9454804717 | 0.0202302957  | 4.7307921367  | H | -1.4916865801 | 0.0374054372  | 4.7597012413  |
| H | 0.7564866451  | 0.5091905744  | 4.7713113692  | H | 0.0973916216  | 0.8062377492  | 4.9042765831  |
| H | 0.2828557885  | -0.9850027489 | 3.9454472232  | H | -0.048887002  | -0.7947011235 | 4.1594000223  |
| H | -0.357548315  | 5.6499399678  | -1.2552554753 | H | -1.2444749029 | 5.3380618286  | -1.5549342099 |
| H | -1.7733919221 | 4.7389978378  | -0.688548681  | H | -2.5254443497 | 4.206250407   | -1.0759239823 |
| H | -0.7489056531 | 5.5416121811  | 0.4766055583  | H | -1.8157431132 | 5.2529195368  | 0.1282644703  |
| H | -4.1584390356 | -3.8053874791 | -0.3025988112 | H | -3.5916719473 | -4.2004634121 | -0.1889770815 |
| H | -4.2386850627 | -3.7577399295 | 1.446670218   | H | -3.8609235502 | -3.9788852499 | 1.5279188707  |
| H | -3.9759301282 | -1.3078484635 | 1.4692261199  | H | -3.9778464923 | -1.5351826422 | 1.2757975075  |
| H | -5.3800231155 | -1.7577235386 | 0.505619646   | H | -5.1893309353 | -2.3033874669 | 0.2565765137  |
| H | -1.9395833961 | -4.3579344405 | 0.7392167866  | H | -1.4373960441 | -4.2590077968 | 1.1090300089  |
| H | -1.9721390571 | -2.8287284162 | 1.6080999918  | H | -1.7927771542 | -2.665405207  | 1.7607975393  |
| H | -1.8222954323 | -0.9675161231 | -2.8668909404 | H | -1.5423605273 | -1.3256494478 | -2.9128128888 |

|            |               |               |               |            |               |               |               |
|------------|---------------|---------------|---------------|------------|---------------|---------------|---------------|
| H          | -1.7953859605 | 0.5416588603  | -1.9897020209 | H          | -1.7231321476 | 0.2594686614  | -2.207128403  |
| H          | 0.5449242568  | 0.127393672   | -2.4652478681 | H          | 0.6912253095  | 0.002561544   | -2.572188982  |
| H          | -2.6630843816 | -3.6000596109 | -2.131453393  | H          | -1.9920092327 | -3.9788312103 | -1.8699574075 |
| H          | -1.0406540842 | -3.0925697508 | -2.5995208904 | H          | -0.4432563259 | -3.2548434641 | -2.30216448   |
| H          | -1.2663894299 | -4.5029660616 | -1.5661279278 | H          | -0.5172181429 | -4.559716544  | -1.1202548876 |
| H          | -4.0662464578 | -0.8827853835 | -2.8373423694 | H          | -3.7383952235 | -1.5446459155 | -3.0415774567 |
| H          | -5.5061545426 | -1.1771052644 | -1.8774881504 | H          | -5.1820771529 | -1.998692158  | -2.1534671194 |
| H          | -4.3551190339 | -2.4896341317 | -2.1532525609 | H          | -3.8113824356 | -3.1122052041 | -2.2204166546 |
| H          | 1.9339514946  | -3.6134492775 | 1.6837581065  | H          | 3.181047388   | -4.010095294  | 0.3616642783  |
| H          | 2.9013958946  | -4.1258464484 | 0.317634449   | H          | 2.4154654748  | -3.4606977132 | -1.1211401209 |
| H          | 0.3253646262  | -4.5121771337 | 0.2621356839  | H          | 1.3317190883  | -3.1767366636 | 1.7185711672  |
| H          | 1.0648961477  | -3.8882258074 | -1.2053776618 | H          | 0.7175510033  | -4.2378895179 | 0.4722825582  |
| H          | 3.5129872105  | -3.1604729857 | 2.8377343831  | H          | 4.8969430579  | -3.6379731557 | 1.2384267658  |
| H          | 5.1430857911  | -2.6774360544 | 2.3645938481  | H          | 6.2450159318  | -2.5409178981 | 0.9222405016  |
| H          | 4.2086583195  | -1.6514109451 | 3.4450475376  | H          | 5.3408720853  | -2.4015398659 | 2.4237046875  |
| H          | 4.811302678   | -0.2188583236 | -0.8351689571 | H          | 4.1083635024  | 1.8695296581  | 0.853703806   |
| H          | 4.5075535703  | 1.4140907372  | -0.2382358027 | H          | 3.1866484753  | 0.6937855903  | 1.7788849866  |
| H          | 3.8193400032  | 0.5458696352  | 1.9534244556  | H          | 5.492252393   | -0.0468270622 | 1.6413950655  |
| H          | 5.3123044818  | -0.2364298901 | 1.5009741855  | H          | 5.4911916537  | 0.0364675966  | -0.1138436626 |
| H          | -3.5642827889 | 1.9275386931  | 0.7375919577  | H          | -3.9657676718 | 1.5999029789  | 0.2984672323  |
| <b>1-5</b> | X axis(Å)     | Y axis(Å)     | Z axis(Å)     | <b>2-1</b> | X axis(Å)     | Y axis(Å)     | Z axis(Å)     |
| C          | -0.2947009522 | 2.6421530052  | 2.8277049934  | C          | 5.2047167233  | -1.4716699707 | 1.803437339   |
| C          | 0.9161232789  | 1.7187100572  | 3.006639111   | C          | 4.2529397079  | -0.4299026837 | 2.39854594    |
| C          | 0.9808310668  | 0.7958580325  | 1.7753345171  | C          | 3.7163854483  | 0.4266896197  | 1.2425155735  |
| C          | 1.1430163707  | 1.5627726554  | 0.4802112702  | C          | 3.0951266486  | -0.3717880702 | 0.1081500623  |
| C          | 0.4642722254  | 2.8110950166  | 0.3419871349  | C          | 3.5323830127  | -1.7051031461 | -0.1663598126 |
| C          | -0.464132947  | 3.2261914031  | 1.4301932366  | C          | 4.576308765   | -2.3214299731 | 0.7071287906  |
| C          | 1.8616948603  | 1.058951601   | -0.6117571443 | C          | 2.1107216097  | 0.197166738   | -0.7088383041 |
| C          | 1.8976544299  | 1.8377919408  | -1.7708179567 | C          | 1.6271962736  | -0.5488235495 | -1.7807516932 |
| C          | 1.3270760548  | 3.0899160769  | -1.9048951816 | C          | 2.0249180587  | -1.838878925  | -2.0747202732 |
| C          | 0.5779568318  | 3.5961034067  | -0.8390392595 | C          | 2.9852674337  | -2.445674059  | -1.2579614723 |
| C          | 2.2216311389  | 2.4890604573  | 3.2618535429  | C          | 3.1390230032  | -1.0686976543 | 3.2432331421  |
| O          | -1.4060256303 | 3.9922742192  | 1.2256066871  | O          | 4.9647736981  | -3.4769568405 | 0.560709841   |
| C          | -0.0737803544 | 4.9480990703  | -1.0170637268 | C          | 3.3894085552  | -3.8584897742 | -1.6104412243 |
| C          | -3.9930634916 | 0.8812100823  | -0.3119033959 | C          | -3.4917822292 | -3.1699907927 | -0.5596082928 |
| O          | -4.6324442716 | 1.5807424094  | -1.0705432249 | O          | -3.4228759975 | -4.3224647799 | -0.1822176771 |
| C          | -4.216911779  | -2.7035116103 | 1.1617287029  | C          | -5.6984820897 | -0.0569928771 | 0.1176002304  |
| C          | -4.5104397169 | -1.2112121259 | 0.9659430119  | C          | -5.2537639468 | -1.4034230149 | -0.4640756502 |
| C          | -3.9145563358 | -0.6585175871 | -0.3625226325 | C          | -4.0038628933 | -1.9791764112 | 0.2668914752  |
| C          | -2.390387513  | -1.0384286839 | -0.4486356897 | C          | -2.8651112934 | -0.8876017567 | 0.2823534815  |
| C          | -1.9698287044 | -2.5035255727 | -0.0970418714 | C          | -3.2626783449 | 0.5573181663  | 0.7328161036  |
| C          | -2.7051261571 | -2.9593284979 | 1.1904336931  | C          | -4.5721948732 | 0.9782253978  | 0.0159462386  |
| C          | -1.729366757  | -0.609728007  | -1.7649420905 | C          | -1.6008742755 | -1.3461806323 | 1.0238084545  |

|   |               |               |               |   |               |               |               |
|---|---------------|---------------|---------------|---|---------------|---------------|---------------|
| C | -0.2436858015 | -0.83845889   | -1.7108741183 | C | -0.5304314528 | -0.290566207  | 1.0023609875  |
| C | 0.36436954    | -1.5683885057 | -0.765577264  | C | -0.7144910226 | 0.9778174706  | 0.6016626578  |
| C | -0.4316720258 | -2.4291595855 | 0.2072946071  | C | -2.1063873793 | 1.5031612106  | 0.2315352307  |
| C | -2.2424603322 | -3.5115688607 | -1.2368914319 | C | -3.4329470714 | 0.6763872627  | 2.2658380143  |
| C | -4.7732366755 | -1.1173319878 | -1.5570077407 | C | -4.4140863961 | -2.5414668107 | 1.6433192522  |
| C | 1.9038758519  | -1.6257410013 | -0.6356391187 | C | 0.5102023098  | 1.9105567755  | 0.4760516846  |
| C | 2.3629300741  | -2.304004632  | 0.6635421316  | C | 0.1227035017  | 3.386819964   | 0.5463920804  |
| C | 1.6419696917  | -3.6077251445 | 0.9994245926  | C | -1.0977314542 | 3.5732933364  | 1.4117119583  |
| C | 0.292148835   | -3.7874067072 | 0.2875838055  | C | -2.3078819869 | 2.9950348592  | 0.6572259742  |
| C | 3.3786661512  | -1.8561066682 | 1.4301220165  | C | 0.7276075575  | 4.3680121456  | -0.1492760792 |
| C | 3.8598051046  | -2.5401719462 | 2.6894169591  | C | 0.3349729223  | 5.8261212098  | -0.1100000057 |
| C | 2.6002010082  | -0.2476992269 | -0.9321850529 | C | 1.4332037479  | 1.5636787232  | -0.756399096  |
| C | 4.07191825    | -0.2740942676 | -0.4070320163 | C | 2.470412007   | 2.7005588826  | -0.9644526008 |
| C | 2.8122089595  | -0.0877088945 | -2.4536693732 | C | 0.55660144    | 1.4097560394  | -2.0164983856 |
| O | 2.5065828253  | 1.2032879095  | -2.837347765  | O | 0.7104749811  | 0.1380008378  | -2.5467564535 |
| O | 3.2484251155  | -0.8884324186 | -3.2361896279 | O | -0.1757012176 | 2.2055537371  | -2.5410589339 |
| C | 4.1812636415  | -0.627423344  | 1.0680707767  | C | 1.8401253587  | 4.0808542597  | -1.1298484966 |
| O | -3.2554138221 | 1.4156745858  | 0.6971935079  | O | -3.1149305644 | -2.8238681847 | -1.8208480792 |
| H | -0.3419564782 | -1.9777140359 | 1.20908977    | H | -2.1635678273 | 1.4857306907  | -0.8651687888 |
| H | -1.923798667  | -0.4318223049 | 0.3360110234  | H | -2.5822738106 | -0.7774184957 | -0.771625781  |
| H | 2.2639241258  | -2.2835265368 | -1.4436318621 | H | 1.126100638   | 1.7100822321  | 1.3628524373  |
| H | -1.2233511053 | 2.0923302293  | 3.0312230465  | H | 6.0690669829  | -0.9620406399 | 1.3508467256  |
| H | -0.2845168928 | 3.4863682006  | 3.5277574524  | H | 5.601279252   | -2.1588694897 | 2.5565838298  |
| H | 0.7324764474  | 1.0838075217  | 3.8830995204  | H | 4.8320527521  | 0.2299638012  | 3.0575397568  |
| H | 1.770325368   | 0.054622771   | 1.8839300936  | H | 2.9992712933  | 1.1574266712  | 1.6249338661  |
| H | 0.0419512703  | 0.2270952835  | 1.7268116665  | H | 4.5523820761  | 1.0116515048  | 0.8309820006  |
| H | 1.4246721117  | 3.6386166607  | -2.8355752568 | H | 1.6021556645  | -2.3622979409 | -2.9253610537 |
| H | 2.1363306146  | 3.0970167225  | 4.1692846512  | H | 3.5654303952  | -1.6469666813 | 4.0698751841  |
| H | 2.4720774659  | 3.1608006137  | 2.433981927   | H | 2.5145898903  | -1.7487216995 | 2.6535373013  |
| H | 3.0639708544  | 1.8023900636  | 3.4014325715  | H | 2.4849534769  | -0.3021879326 | 3.6734722987  |
| H | 0.3750721682  | 5.4657727099  | -1.869774735  | H | 2.8426590968  | -4.1863215264 | -2.4994108354 |
| H | -1.1481925115 | 4.8478920346  | -1.1951942495 | H | 4.4625237921  | -3.9369544615 | -1.8027276172 |
| H | 0.028208069   | 5.5752197871  | -0.1283589188 | H | 3.1858399488  | -4.5526958602 | -0.791013341  |
| H | -4.6969857296 | -3.3000914429 | 0.3767374788  | H | -6.0277931173 | -0.172911264  | 1.1572427708  |
| H | -4.6610871274 | -3.0357417342 | 2.1079785711  | H | -6.5736820844 | 0.3013320827  | -0.437967651  |
| H | -4.0826042044 | -0.6581452062 | 1.8100650517  | H | -5.0166666179 | -1.2642394582 | -1.5247428093 |
| H | -5.5912683308 | -1.0246098916 | 0.9775634362  | H | -6.0684472553 | -2.1363484719 | -0.4110231794 |
| H | -2.5076352372 | -4.0224701049 | 1.3752827775  | H | -4.9171665789 | 1.942797636   | 0.4069033978  |
| H | -2.2884810383 | -2.4122776641 | 2.048640876   | H | -4.3516404237 | 1.1373547122  | -1.0492570137 |
| H | -2.1724833106 | -1.1268179026 | -2.6264578998 | H | -1.8238300815 | -1.6279338667 | 2.0619194098  |
| H | -1.9063510473 | 0.4592232871  | -1.946229547  | H | -1.2015188201 | -2.2582697145 | 0.5585593774  |
| H | 0.3341151365  | -0.3079550797 | -2.462369004  | H | 0.4633354349  | -0.6152652317 | 1.3023364326  |
| H | -3.2939983382 | -3.528236074  | -1.5285024176 | H | -4.2013481881 | 0.0035807392  | 2.6473849545  |

|            |               |               |               |            |               |               |               |
|------------|---------------|---------------|---------------|------------|---------------|---------------|---------------|
| H          | -1.654194576  | -3.2886521651 | -2.1312603909 | H          | -2.5043695613 | 0.4536896138  | 2.798283561   |
| H          | -1.9826397791 | -4.526169481  | -0.9195657899 | H          | -3.7362862364 | 1.6880149182  | 2.549671008   |
| H          | -4.3872072671 | -0.7424263635 | -2.5070081069 | H          | -3.5615013511 | -2.9375597815 | 2.19849256    |
| H          | -5.7904675048 | -0.7309296117 | -1.4524534744 | H          | -5.1153264217 | -3.3687981723 | 1.5071123954  |
| H          | -4.8287361206 | -2.2052226972 | -1.6136858243 | H          | -4.902906738  | -1.7848936654 | 2.2568151302  |
| H          | 1.4611234711  | -3.6463035494 | 2.07933378    | H          | -1.27884154   | 4.6200068621  | 1.6632014207  |
| H          | 2.2973588274  | -4.4608631068 | 0.7741866671  | H          | -0.9686332289 | 3.0378225084  | 2.3635992304  |
| H          | -0.3029948911 | -4.5252895862 | 0.8357785327  | H          | -2.4730505311 | 3.6047197096  | -0.2370750299 |
| H          | 0.436050508   | -4.1864239374 | -0.7230882951 | H          | -3.203252022  | 3.1071461424  | 1.2742715468  |
| H          | 3.1473435486  | -3.2524937536 | 3.1083570175  | H          | -0.5095563786 | 6.0419201624  | 0.5451117274  |
| H          | 4.7957581056  | -3.0847060624 | 2.5003864577  | H          | 1.1807760921  | 6.4450230091  | 0.2186741723  |
| H          | 4.0860877064  | -1.7960538324 | 3.4640485659  | H          | 0.070108717   | 6.1722409051  | -1.1182906866 |
| H          | 4.6050211786  | -1.0323360921 | -0.9914954922 | H          | 3.1056084115  | 2.4608265146  | -1.8251119482 |
| H          | 4.5478249898  | 0.6910747322  | -0.6133820337 | H          | 3.122616659   | 2.7080956452  | -0.0860750005 |
| H          | 3.8923469086  | 0.2241430325  | 1.7014384457  | H          | 1.4402951509  | 4.2000038446  | -2.1463978892 |
| H          | 5.2388130024  | -0.8113633657 | 1.3018789683  | H          | 2.6283288271  | 4.8396168384  | -1.0269045123 |
| H          | -3.3036897595 | 2.3874501684  | 0.6386263343  | H          | -2.8252740124 | -3.6419129128 | -2.25837134   |
| <b>2-2</b> | X axis(Å)     | Y axis(Å)     | Z axis(Å)     | <b>2-3</b> | X axis(Å)     | Y axis(Å)     | Z axis(Å)     |
| C          | 5.1322274883  | -1.6214766013 | 1.7341960031  | C          | 5.1383226374  | -1.6830785608 | 1.7332964014  |
| C          | 4.2285373669  | -0.5629609237 | 2.3734075936  | C          | 4.2673574057  | -0.5842803572 | 2.3491287393  |
| C          | 3.703822086   | 0.3442189743  | 1.2510994102  | C          | 3.7483827048  | 0.2975428052  | 1.2042022891  |
| C          | 3.0524557992  | -0.3965068272 | 0.0941190092  | C          | 3.0597655076  | -0.4665634508 | 0.0847195363  |
| C          | 3.4283537705  | -1.7409763351 | -0.2151105707 | C          | 3.4018306328  | -1.8282382241 | -0.1863197638 |
| C          | 4.4439241577  | -2.4256306284 | 0.6397859964  | C          | 4.4213832388  | -2.504521528  | 0.6700228823  |
| C          | 2.0983486561  | 0.2387932147  | -0.7098876937 | C          | 2.103213597   | 0.1614883861  | -0.7217161705 |
| C          | 1.5827459776  | -0.4567065664 | -1.8007631766 | C          | 1.5508486141  | -0.5591513117 | -1.777697292  |
| C          | 1.9169005099  | -1.7573037439 | -2.1256822912 | C          | 1.8496140973  | -1.8771128497 | -2.0635750368 |
| C          | 2.8464913346  | -2.4280392237 | -1.3239942404 | C          | 2.7816228705  | -2.5400442685 | -1.2583591612 |
| C          | 3.1072954627  | -1.1860677793 | 3.2201868414  | C          | 3.1434585723  | -1.1537799945 | 3.2295156006  |
| O          | 4.7617504989  | -3.6011671148 | 0.480751698   | O          | 4.7222620308  | -3.6877449001 | 0.5362679781  |
| C          | 3.1840783111  | -3.8493907182 | -1.7110081511 | C          | 3.0781297155  | -3.9817773841 | -1.6006335125 |
| C          | -3.3603828641 | -3.1333516139 | -0.5976595204 | C          | -3.4886890268 | -3.0436609691 | -0.5792866042 |
| O          | -2.9847204325 | -3.0220692914 | -1.7480188046 | O          | -2.5692695798 | -3.0298983615 | -1.3729827437 |
| C          | -5.6379190528 | -0.0791784271 | -0.0224427134 | C          | -5.6314784108 | 0.0762663222  | 0.0820495075  |
| C          | -5.1610012034 | -1.4386469654 | -0.5431231503 | C          | -5.2056193656 | -1.2935816357 | -0.4540309126 |
| C          | -3.9358220957 | -1.9836971713 | 0.2489185429  | C          | -3.9608448667 | -1.8689756586 | 0.2947915569  |
| C          | -2.8084826162 | -0.8793815878 | 0.2730638243  | C          | -2.8147762857 | -0.7992076918 | 0.3168571031  |
| C          | -3.232471464  | 0.575527307   | 0.6624112068  | C          | -3.1997105087 | 0.6694935749  | 0.7050760227  |
| C          | -4.5171334614 | 0.962508407   | -0.1154635616 | C          | -4.4878188752 | 1.0874994891  | -0.0487495738 |
| C          | -1.5675116252 | -1.3049201868 | 1.0714329692  | C          | -1.5824405326 | -1.2462642285 | 1.1181817164  |
| C          | -0.5059680299 | -0.240776043  | 1.0589102589  | C          | -0.4935980027 | -0.2103696683 | 1.0796714346  |
| C          | -0.6847006364 | 1.0131089571  | 0.6139215363  | C          | -0.6442209465 | 1.0412376957  | 0.6178534319  |
| C          | -2.0645611343 | 1.5145809573  | 0.1746724932  | C          | -2.0167039571 | 1.5761709969  | 0.1951156933  |

|   |               |               |               |   |               |               |               |
|---|---------------|---------------|---------------|---|---------------|---------------|---------------|
| C | -3.460941933  | 0.7431568948  | 2.1832770617  | C | -3.4021172749 | 0.8530750491  | 2.2285086967  |
| C | -4.391547702  | -2.5064027163 | 1.627248235   | C | -4.3842825318 | -2.4154720166 | 1.6793278773  |
| C | 0.5343219667  | 1.9518439163  | 0.5139766558  | C | 0.59842485    | 1.9431005721  | 0.4757923467  |
| C | 0.1435568626  | 3.4276026033  | 0.5997006296  | C | 0.2480973212  | 3.4300072684  | 0.5310636856  |
| C | -1.1315029389 | 3.6010262742  | 1.3860566305  | C | -0.9978803859 | 3.6558410299  | 1.3500139274  |
| C | -2.2847557507 | 3.0169374087  | 0.5497597574  | C | -2.1921306919 | 3.0867719203  | 0.5622888773  |
| C | 0.7959041129  | 4.4209135173  | -0.033338058  | C | 0.905480959   | 4.3893398731  | -0.1475168931 |
| C | 0.4134912329  | 5.8813311661  | 0.02109293    | C | 0.5591172602  | 5.8595346714  | -0.123416886  |
| C | 1.4736517441  | 1.6307135812  | -0.7156710569 | C | 1.50636895    | 1.564925008   | -0.761096887  |
| C | 2.5438602609  | 2.746931643   | -0.8426022856 | C | 2.5956294705  | 2.653937367   | -0.9476241924 |
| C | 0.6172176145  | 1.5592038276  | -1.996975506  | C | 0.6223673345  | 1.4685975125  | -2.0219474378 |
| O | 0.7043173702  | 0.292843217   | -2.5523202286 | O | 0.6733458429  | 0.1843040061  | -2.5369957571 |
| O | -0.0565311032 | 2.4089386068  | -2.5156995239 | O | -0.0453312601 | 2.3149422773  | -2.5546897376 |
| C | 1.9545923954  | 4.150699934   | -0.9643337554 | C | 2.0319443338  | 4.0650808168  | -1.1005662229 |
| O | -3.299505449  | -4.329580241  | 0.0437035394  | O | -4.2661513043 | -4.1511717714 | -0.4346282944 |
| H | -2.0851005479 | 1.4628428444  | -0.9222081658 | H | -2.0542585113 | 1.5185959369  | -0.9010125203 |
| H | -2.4941939269 | -0.8084544092 | -0.776171569  | H | -2.4877993075 | -0.7392646645 | -0.7284343882 |
| H | 1.1456874058  | 1.7378471395  | 1.4008419953  | H | 1.2184813374  | 1.7346367461  | 1.3579903761  |
| H | 6.0004345745  | -1.1295894106 | 1.2695703865  | H | 6.0131533689  | -1.2267421203 | 1.2453879065  |
| H | 5.5238397505  | -2.3366429929 | 2.4634117862  | H | 5.5211249306  | -2.3849869173 | 2.4799523298  |
| H | 4.8415051296  | 0.0574149348  | 3.0401281438  | H | 4.9028879239  | 0.043176187   | 2.9875803159  |
| H | 3.0080033259  | 1.0787764424  | 1.6651206565  | H | 3.0781455082  | 1.0636882242  | 1.6027991231  |
| H | 4.5506484806  | 0.9224082104  | 0.8526015742  | H | 4.6033384096  | 0.8394588411  | 0.7732836002  |
| H | 1.4655773047  | -2.2399021469 | -2.9856190225 | H | 1.3659425847  | -2.3806177691 | -2.893223615  |
| H | 3.5269137198  | -1.8031371162 | 4.0219313045  | H | 3.559622532   | -1.7528715453 | 4.046599466   |
| H | 2.4486889838  | -1.8259922796 | 2.6228041684  | H | 2.4637704121  | -1.7983730805 | 2.6615626649  |
| H | 2.4890912328  | -0.4095018789 | 3.6841257966  | H | 2.5480248864  | -0.3486657966 | 3.674216926   |
| H | 2.6284146438  | -4.1267082    | -2.6114290718 | H | 2.4906107032  | -4.2800592719 | -2.473629529  |
| H | 4.2535506414  | -3.975380638  | -1.8987193186 | H | 4.1389603137  | -4.1379968656 | -1.8131526491 |
| H | 2.9412228971  | -4.5536907111 | -0.9110750009 | H | 2.8430627842  | -4.650136418  | -0.7682369573 |
| H | -6.0065293935 | -0.163694012  | 1.007295686   | H | -5.9644597371 | -0.0044251835 | 1.1240744869  |
| H | -6.4940138271 | 0.2528345121  | -0.6222907214 | H | -6.5006820002 | 0.4280065622  | -0.4870332706 |
| H | -4.8758304382 | -1.335625876  | -1.5960873283 | H | -4.9598119223 | -1.185074065  | -1.519240344  |
| H | -5.9729948257 | -2.1756954248 | -0.5006637873 | H | -6.0276752481 | -2.0145307753 | -0.3882352363 |
| H | -4.884044811  | 1.9357597608  | 0.2315418526  | H | -4.8200834219 | 2.0733644105  | 0.2974342361  |
| H | -4.2583446395 | 1.0891912643  | -1.1761842621 | H | -4.2505448406 | 1.198098518   | -1.1165144922 |
| H | -1.8238859608 | -1.560476939  | 2.1089279519  | H | -1.8401705588 | -1.4739448244 | 2.1621625192  |
| H | -1.1432475431 | -2.2238121824 | 0.643099369   | H | -1.1888205166 | -2.1794635261 | 0.6966756753  |
| H | 0.4784545308  | -0.5467992895 | 1.4059596366  | H | 0.4880140731  | -0.538393164  | 1.4146387783  |
| H | -4.2550205103 | 0.0940110817  | 2.5539023734  | H | -4.2080496027 | 0.2278794622  | 2.6154665204  |
| H | -2.5579855341 | 0.5239290497  | 2.7593812148  | H | -2.4975098189 | 0.6153274946  | 2.7940860908  |
| H | -3.7593382301 | 1.7674703009  | 2.4236130561  | H | -3.6718025037 | 1.8860447583  | 2.4656959704  |
| H | -3.5615139598 | -2.8834452833 | 2.2280208558  | H | -3.5520398435 | -2.8971519726 | 2.2001190466  |



|            |               |               |               |             |               |               |               |
|------------|---------------|---------------|---------------|-------------|---------------|---------------|---------------|
| H          | -5.0985551964 | -3.3306652266 | 1.4994811923  | H           | -5.1757659402 | -3.1589686969 | 1.5659285684  |
| H          | -4.8966583507 | -1.727328033  | 2.1983546752  | H           | -4.7616088388 | -1.6198261166 | 2.3216658911  |
| H          | -1.3366274791 | 4.6458642718  | 1.625972745   | H           | -1.1671245359 | 4.7106885466  | 1.5740455841  |
| H          | -1.0625972347 | 3.0640399087  | 2.3432465072  | H           | -0.9141929672 | 3.1366744027  | 2.3158341854  |
| H          | -2.3710268948 | 3.6082585181  | -0.3675181697 | H           | -2.2998405634 | 3.6703930577  | -0.3577499149 |
| H          | -3.2261761219 | 3.1492346099  | 1.0897131813  | H           | -3.1098336192 | 3.24507981    | 1.1351676692  |
| H          | -0.4477158368 | 6.0925488068  | 0.6555961577  | H           | -0.2826200292 | 6.1077448505  | 0.5237727724  |
| H          | 1.2542386452  | 6.4861139757  | 0.3866782145  | H           | 1.421826668   | 6.4533063538  | 0.207534739   |
| H          | 0.1816224839  | 6.2488813424  | -0.9878279549 | H           | 0.3134090547  | 6.2062088757  | -1.136450531  |
| H          | 3.1986352355  | 2.5300199603  | -1.6945726179 | H           | 3.2257266024  | 2.396632648   | -1.8069593178 |
| H          | 3.1695017428  | 2.6983465175  | 0.0533514925  | H           | 3.2411880813  | 2.6206959662  | -0.0651685936 |
| H          | 1.6112874752  | 4.3322843623  | -1.9922187192 | H           | 1.6642634656  | 4.2200230831  | -2.1243694712 |
| H          | 2.7542893736  | 4.8822566973  | -0.7823946539 | H           | 2.8508733228  | 4.7852368246  | -0.9642781903 |
| H          | -2.9303918021 | -4.9636421637 | -0.5951901454 | H           | -3.9271367753 | -4.8094305972 | -1.0646986464 |
| <b>2-4</b> | X axis(Å)     | Y axis(Å)     | Z axis(Å)     | <b>3a-1</b> | X axis(Å)     | Y axis(Å)     | Z axis(Å)     |
| C          | -4.9377573219 | -1.6839349655 | -1.9603010427 | C           | 4.72092       | -2.64626      | 1.32504       |
| C          | -4.8978957256 | -0.1735897144 | -1.7324033798 | C           | 4.20028       | -1.36423      | 1.98355       |
| C          | -3.4692582599 | 0.2013785972  | -1.3258197633 | C           | 3.72669       | -0.4197       | 0.86904       |
| C          | -2.9780140175 | -0.5544245333 | -0.1050438189 | C           | 2.7764        | -1.04978      | -0.13431      |
| C          | -3.4306854284 | -1.8867112575 | 0.1461891649  | C           | 2.76132       | -2.46133      | -0.35453      |
| C          | -4.4139934593 | -2.5082674    | -0.7911548212 | C           | 3.68894       | -3.32527      | 0.4357        |
| C          | -2.046676112  | 0.0188532143  | 0.7674506419  | C           | 1.9198        | -0.24219      | -0.88932      |
| C          | -1.6016114846 | -0.7352930438 | 1.8503621035  | C           | 1.10694       | -0.84684      | -1.844        |
| C          | -2.0212173025 | -2.0222061812 | 2.1280285272  | C           | 1.05088       | -2.20742      | -2.07282      |
| C          | -2.9520480495 | -2.6223157246 | 1.2727788723  | C           | 1.88031       | -3.04337      | -1.31624      |
| C          | -5.3700147469 | 0.6093047536  | -2.9620111754 | C           | 3.11332       | -1.64844      | 3.0327        |
| O          | -4.8066579316 | -3.6650506347 | -0.6684360674 | O           | 3.66681       | -4.55149      | 0.37707       |
| C          | -3.3883644234 | -4.0283444211 | 1.6130936865  | C           | 1.79497       | -4.52626      | -1.59447      |
| C          | 3.7467956626  | -3.0547815679 | 0.3864859579  | C           | -3.62098      | -2.74217      | -0.38668      |
| O          | 3.714255727   | -4.2049913446 | -0.0025521752 | O           | -3.11941      | -2.76672      | -1.49376      |
| C          | 5.7711787775  | 0.16827879    | -0.345546333  | C           | -5.51769      | 0.60557       | -0.21205      |
| C          | 5.4177885592  | -1.2048808461 | 0.2365752712  | C           | -5.19243      | -0.84435      | -0.58577      |
| C          | 4.1655720092  | -1.8321580278 | -0.4463889165 | C           | -4.09538      | -1.46458      | 0.33067       |
| C          | 2.9762527868  | -0.7967975086 | -0.3980306722 | C           | -2.84184      | -0.50815      | 0.35259       |
| C          | 3.2841580049  | 0.6711161849  | -0.8444254225 | C           | -3.09681      | 1.0164        | 0.58992       |
| C          | 4.6023548435  | 1.1464257795  | -0.1797726315 | C           | -4.26667      | 1.4858        | -0.31424      |
| C          | 1.7044733158  | -1.3059386107 | -1.0918803872 | C           | -1.71972      | -1.00473      | 1.27531       |
| C          | 0.5854979786  | -0.3053144158 | -1.0013532564 | C           | -0.50332      | -0.12955      | 1.1618        |
| C          | 0.7266048452  | 0.9653153351  | -0.5901797879 | C           | -0.49708      | 1.07858       | 0.57616       |
| C          | 2.10749979    | 1.5538008267  | -0.2797435377 | C           | -1.78702      | 1.76313       | 0.13116       |
| C          | 3.3800395445  | 0.8147612594  | -2.3819852027 | C           | -3.4096       | 1.35189       | 2.0677        |
| C          | 4.5416120546  | -2.3598099221 | -1.8461137235 | C           | -4.69675      | -1.81275      | 1.70823       |
| C          | -0.5345092851 | 1.8352358642  | -0.3817534438 | C           | 0.84127       | 1.78663       | 0.34677       |

|   |               |               |               |   |          |          |          |
|---|---------------|---------------|---------------|---|----------|----------|----------|
| C | -0.2128909    | 3.3281597344  | -0.4023977771 | C | 0.77498  | 3.32567  | 0.35321  |
| C | 0.9354414966  | 3.6054713028  | -1.338459279  | C | -0.53984 | 3.96999  | -0.04104 |
| C | 2.2208247981  | 3.0588942967  | -0.6928457831 | C | -1.74005 | 3.2441   | 0.56973  |
| C | -0.8074538066 | 4.2493937857  | 0.3785316155  | C | 2.0697   | 4.02571  | 0.20401  |
| C | -0.4735230606 | 5.722551403   | 0.3868217831  | C | 2.19574  | 5.43304  | -0.33875 |
| C | -1.3880881331 | 1.3915670547  | 0.8616156991  | C | 1.65177  | 1.25646  | -0.93767 |
| C | -2.446912674  | 2.4837635079  | 1.1981092288  | C | 2.92156  | 2.13831  | -1.20066 |
| C | -0.4820668593 | 1.1953818992  | 2.0945185712  | C | 0.71898  | 1.33335  | -2.16118 |
| O | -0.6916033547 | -0.0634913213 | 2.6378023684  | O | 0.36603  | 0.06475  | -2.57184 |
| O | 0.2943857663  | 1.9591128736  | 2.6025773096  | O | 0.30929  | 2.30903  | -2.73466 |
| C | -1.8444803564 | 3.8699855492  | 1.4094830294  | C | 3.26481  | 3.11511  | -0.06111 |
| O | 3.4108990497  | -2.7401568702 | 1.6672482605  | O | 1.45222  | 3.90562  | 1.50655  |
| H | 2.212347738   | 1.5270913101  | 0.813254789   | O | -3.81522 | -3.88803 | 0.31599  |
| H | 2.7339705938  | -0.713475276  | 0.6684129342  | H | -1.8067  | 1.76949  | -0.96958 |
| H | -1.1744759851 | 1.6473122569  | -1.2540724081 | H | -2.45066 | -0.57154 | -0.67095 |
| H | -5.9448650942 | -2.0497766387 | -2.1831917799 | H | 1.48259  | 1.5249   | 1.19071  |
| H | -4.3138261799 | -1.9354841569 | -2.8330161662 | H | 5.05702  | -3.38682 | 2.05639  |
| H | -5.5647536554 | 0.0678864918  | -0.8912769258 | H | 5.58591  | -2.40599 | 0.68812  |
| H | -2.8002240436 | -0.0158882887 | -2.1745250144 | H | 5.03767  | -0.87575 | 2.49821  |
| H | -3.4005617057 | 1.2781045851  | -1.1587573821 | H | 3.26392  | 0.467    | 1.30996  |
| H | -1.6348434223 | -2.5499805728 | 2.9931771887  | H | 4.61028  | -0.0564  | 0.32301  |
| H | -6.3941038568 | 0.3324659537  | -3.2348182509 | H | 0.37827  | -2.6112  | -2.82139 |
| H | -4.7277906908 | 0.4069935542  | -3.8281606464 | H | 2.77638  | -0.72083 | 3.5083   |
| H | -5.3534253734 | 1.6893844177  | -2.776946924  | H | 3.49829  | -2.30708 | 3.81854  |
| H | -2.900908984  | -4.3512103427 | 2.5376227461  | H | 2.23698  | -2.13807 | 2.59371  |
| H | -4.4720374767 | -4.0967310483 | 1.7388342221  | H | 1.07401  | -4.70879 | -2.39635 |
| H | -3.1398351061 | -4.7319754588 | 0.8143926965  | H | 2.76414  | -4.94086 | -1.8841  |
| H | 6.0586185604  | 0.0808647345  | -1.4003339889 | H | 1.49002  | -5.08554 | -0.70612 |
| H | 6.6523614978  | 0.5618178707  | 0.1756851428  | H | -6.28754 | 0.98572  | -0.89443 |
| H | 5.2221654412  | -1.0897043066 | 1.3085066003  | H | -5.95181 | 0.66168  | 0.79377  |
| H | 6.2634572911  | -1.8967852621 | 0.1374462386  | H | -6.09427 | -1.46782 | -0.53894 |
| H | 4.8821701743  | 2.131418515   | -0.571943168  | H | -4.83634 | -0.87101 | -1.62188 |
| H | 4.4219695462  | 1.2817238261  | 0.8962143857  | H | -4.52354 | 2.52584  | -0.08073 |
| H | 1.8941298018  | -1.5579644628 | -2.1441390683 | H | -3.92967 | 1.47466  | -1.36026 |
| H | 1.3720337575  | -2.2447682068 | -0.6273485921 | H | -2.0524  | -1.06115 | 2.32094  |
| H | -0.4046207461 | -0.6780299152 | -1.2542509691 | H | -1.43294 | -2.03013 | 1.00419  |
| H | 4.1480025794  | 0.1687760053  | -2.808035403  | H | 0.42987  | -0.54766 | 1.53284  |
| H | 2.4339947342  | 0.5720813189  | -2.8735462672 | H | -4.24444 | 0.76803  | 2.45568  |
| H | 3.6415231905  | 1.8379168988  | -2.665988211  | H | -2.5495  | 1.17122  | 2.71904  |
| H | 3.6839687644  | -2.7834717238 | -2.3724101968 | H | -3.68411 | 2.40526  | 2.17343  |
| H | 5.2808068788  | -3.1592057965 | -1.7498936713 | H | -3.9548  | -2.22351 | 2.39631  |
| H | 4.9744208885  | -1.5761833871 | -2.467626637  | H | -5.48418 | -2.56245 | 1.59512  |
| H | 1.0509177359  | 4.6679796189  | -1.5612739919 | H | -5.14481 | -0.93638 | 2.17678  |

|             |               |               |               |             |           |           |           |
|-------------|---------------|---------------|---------------|-------------|-----------|-----------|-----------|
| H           | 0.7640434715  | 3.0987973297  | -2.2994549263 | H           | -0.53312  | 5.01255   | 0.28615   |
| H           | 2.4360888879  | 3.6592216946  | 0.1971986121  | H           | -0.61774  | 3.96245   | -1.13462  |
| H           | 3.0587021772  | 3.2141995636  | -1.3774820902 | H           | -1.67844  | 3.31162   | 1.66164   |
| H           | 0.3272600187  | 6.0003564167  | -0.2992403196 | H           | -2.65989  | 3.75529   | 0.2661    |
| H           | -1.3579730418 | 6.3213153644  | 0.1302885528  | H           | 1.29787   | 6.02652   | -0.16389  |
| H           | -0.1694458652 | 6.0340832393  | 1.3953076008  | H           | 3.03806   | 5.93895   | 0.14746   |
| H           | -3.0208340733 | 2.1725368253  | 2.078477351   | H           | 2.39306   | 5.41081   | -1.41682  |
| H           | -3.1547792574 | 2.5244734311  | 0.3647922089  | H           | 2.7428    | 2.73037   | -2.10444  |
| H           | -1.3835419403 | 3.9400364706  | 2.4046393267  | H           | 3.77385   | 1.4875    | -1.41698  |
| H           | -2.6581105648 | 4.6085193599  | 1.4042395384  | H           | 4.14132   | 3.70445   | -0.35245  |
| H           | 3.1773910169  | -3.5749159101 | 2.1067691704  | H           | 3.53194   | 2.5878    | 0.85885   |
|             |               |               |               | H           | -3.49157  | -4.61267  | -0.24666  |
| <b>3a-2</b> | X axis(Å)     | Y axis(Å)     | Z axis(Å)     | <b>3a-3</b> | X axis(Å) | Y axis(Å) | Z axis(Å) |
| C           | 4.73822       | -2.66893      | 1.336         | C           | 4.87735   | -2.35197  | 1.44246   |
| C           | 4.23153       | -1.37333      | 1.97809       | C           | 4.22248   | -1.12247  | 2.08035   |
| C           | 3.75163       | -0.44513      | 0.85271       | C           | 3.71808   | -0.21507  | 0.94858   |
| C           | 2.786         | -1.08658      | -0.12846      | C           | 2.86096   | -0.91626  | -0.09056  |
| C           | 2.75936       | -2.5017       | -0.32333      | C           | 2.97771   | -2.32205  | -0.31633  |
| C           | 3.69501       | -3.35696      | 0.46647       | C           | 3.94868   | -3.10862  | 0.50369   |
| C           | 1.9248        | -0.28708      | -0.88688      | C           | 1.96391   | -0.18001  | -0.87241  |
| C           | 1.09458       | -0.90377      | -1.81854      | C           | 1.24085   | -0.84707  | -1.85688  |
| C           | 1.02455       | -2.26767      | -2.01971      | C           | 1.31852   | -2.20508  | -2.09609  |
| C           | 1.8592        | -3.09523      | -1.26011      | C           | 2.19072   | -2.97184  | -1.31488  |
| C           | 3.15355       | -1.63326      | 3.04277       | C           | 3.11962   | -1.50289  | 3.08132   |
| O           | 3.67264       | -4.58384      | 0.42231       | O           | 4.04148   | -4.33027  | 0.42941   |
| C           | 1.75601       | -4.58249      | -1.50612      | C           | 2.25075   | -4.45319  | -1.60722  |
| C           | -3.72793      | -2.67789      | -0.40787      | C           | -3.6479   | -2.9454   | -0.29     |
| O           | -2.77448      | -2.82531      | -1.14651      | O           | -3.70734  | -4.04844  | 0.21475   |
| C           | -5.51557      | 0.70862       | -0.10728      | C           | -5.60218  | 0.39694   | -0.13229  |
| C           | -5.23396      | -0.74208      | -0.50914      | C           | -5.2477   | -1.04236  | -0.52155  |
| C           | -4.10594      | -1.39485      | 0.35339       | C           | -4.10485  | -1.62928  | 0.36039   |
| C           | -2.84438      | -0.46455      | 0.37209       | C           | -2.87589  | -0.64037  | 0.34271   |
| C           | -3.06971      | 1.06485       | 0.62276       | C           | -3.17011  | 0.87418   | 0.60105   |
| C           | -4.25146      | 1.56303       | -0.24823      | C           | -4.38028  | 1.31339   | -0.26484  |
| C           | -1.72086      | -0.97894      | 1.28452       | C           | -1.70965  | -1.10933  | 1.22401   |
| C           | -0.49266      | -0.12167      | 1.15917       | C           | -0.52955  | -0.18689  | 1.10141   |
| C           | -0.47221      | 1.08556       | 0.57171       | C           | -0.57594  | 1.03031   | 0.53614   |
| C           | -1.75701      | 1.78925       | 0.14031       | C           | -1.89872  | 1.66577   | 0.11136   |
| C           | -3.34535      | 1.40194       | 2.1081        | C           | -3.44832  | 1.1878    | 2.09038   |
| C           | -4.66417      | -1.78286      | 1.7435        | C           | -4.65426  | -1.99476  | 1.75472   |
| C           | 0.87527       | 1.77143       | 0.32488       | C           | 0.73369   | 1.79915   | 0.31971   |
| C           | 0.83256       | 3.31155       | 0.31407       | C           | 0.59804   | 3.3346    | 0.31465   |

|   |          |          |          |   |          |          |          |
|---|----------|----------|----------|---|----------|----------|----------|
| C | -0.47746 | 3.97186  | -0.06899 | C | -0.74104 | 3.91572  | -0.09199 |
| C | -1.67928 | 3.27178  | 0.56769  | C | -1.90533 | 3.15034  | 0.53755  |
| C | 2.13453  | 3.99218  | 0.13955  | C | 1.85935  | 4.09552  | 0.17587  |
| C | 2.27225  | 5.39212  | -0.41965 | C | 1.92472  | 5.5058   | -0.37043 |
| C | 1.66627  | 1.21233  | -0.95967 | C | 1.58875  | 1.29573  | -0.9433  |
| C | 2.93827  | 2.07926  | -1.25675 | C | 2.8069   | 2.24797  | -1.21368 |
| C | 0.71621  | 1.27289  | -2.17064 | C | 0.67066  | 1.29244  | -2.18074 |
| O | 0.34998  | 0.00009  | -2.55346 | O | 0.44667  | -0.00142 | -2.6068  |
| O | 0.30295  | 2.24136  | -2.7544  | O | 0.18028  | 2.22837  | -2.75642 |
| C | 3.31332  | 3.06326  | -0.13372 | C | 3.09866  | 3.24286  | -0.07623 |
| O | 1.53405  | 3.89453  | 1.45169  | O | 1.23585  | 3.95064  | 1.47232  |
| O | -4.63273 | -3.67852 | -0.23327 | O | -3.15944 | -2.78056 | -1.55035 |
| H | -1.79351 | 1.78909  | -0.96015 | H | -1.93828 | 1.66302  | -0.98918 |
| H | -2.45233 | -0.52869 | -0.65045 | H | -2.51345 | -0.67675 | -0.69222 |
| H | 1.51935  | 1.51008  | 1.16687  | H | 1.3705   | 1.5762   | 1.17787  |
| H | 5.07671  | -3.39962 | 2.07617  | H | 5.24054  | -3.06736 | 2.1858   |
| H | 5.599    | -2.44453 | 0.68765  | H | 5.74766  | -2.03676 | 0.84673  |
| H | 5.07679  | -0.88096 | 2.47601  | H | 4.99282  | -0.56748 | 2.63096  |
| H | 3.2986   | 0.45124  | 1.28395  | H | 3.16867  | 0.6291   | 1.37249  |
| H | 4.63129  | -0.09609 | 0.2912   | H | 4.5894   | 0.22049  | 0.43673  |
| H | 0.33357  | -2.6814  | -2.74539 | H | 0.72379  | -2.65878 | -2.88133 |
| H | 2.82738  | -0.69567 | 3.5062   | H | 2.68522  | -0.60949 | 3.54311  |
| H | 3.54247  | -2.28126 | 3.83553  | H | 3.52528  | -2.13018 | 3.88218  |
| H | 2.26967  | -2.12418 | 2.62078  | H | 2.30745  | -2.06311 | 2.60495  |
| H | 1.01519  | -4.77479 | -2.28719 | H | 1.58522  | -4.69083 | -2.44232 |
| H | 2.71522  | -5.01105 | -1.80845 | H | 3.26444  | -4.77697 | -1.85675 |
| H | 1.46533  | -5.12041 | -0.60008 | H | 1.95746  | -5.04742 | -0.73788 |
| H | -6.30577 | 1.11057  | -0.75303 | H | -6.40175 | 0.75867  | -0.79013 |
| H | -5.90682 | 0.75714  | 0.91628  | H | -6.00803 | 0.43617  | 0.88576  |
| H | -6.13965 | -1.35376 | -0.43522 | H | -6.12824 | -1.6923  | -0.44472 |
| H | -4.9262  | -0.75269 | -1.56365 | H | -4.93284 | -1.0524  | -1.571   |
| H | -4.47944 | 2.60769  | -0.00622 | H | -4.66161 | 2.34335  | -0.01627 |
| H | -3.94561 | 1.54683  | -1.30399 | H | -4.07379 | 1.3201   | -1.32054 |
| H | -2.0433  | -1.02761 | 2.33405  | H | -2.01183 | -1.1965  | 2.27653  |
| H | -1.45434 | -2.00519 | 1.00357  | H | -1.39392 | -2.11973 | 0.9298   |
| H | 0.43755  | -0.55428 | 1.52119  | H | 0.42197  | -0.573   | 1.46021  |
| H | -4.18614 | 0.83676  | 2.5116   | H | -4.24566 | 0.56841  | 2.50065  |
| H | -2.47721 | 1.20039  | 2.74198  | H | -2.56067 | 1.03717  | 2.7117   |
| H | -3.59426 | 2.4609   | 2.22176  | H | -3.76043 | 2.22886  | 2.21277  |
| H | -3.91335 | -2.28628 | 2.35884  | H | -3.87364 | -2.3634  | 2.42339  |
| H | -5.51127 | -2.46279 | 1.63416  | H | -5.39368 | -2.79385 | 1.6592   |
| H | -5.00919 | -0.90575 | 2.29119  | H | -5.14109 | -1.14336 | 2.23002  |
| H | -0.44972 | 5.01809  | 0.24499  | H | -0.7788  | 4.96395  | 0.21388  |

|             |           |           |           |             |           |           |           |
|-------------|-----------|-----------|-----------|-------------|-----------|-----------|-----------|
| H           | -0.57145  | 3.95185   | -1.16128  | H           | -0.81948  | 3.88172   | -1.18509  |
| H           | -1.59788  | 3.34652   | 1.65791   | H           | -1.83457  | 3.23116   | 1.62798   |
| H           | -2.59515  | 3.79665   | 0.27562   | H           | -2.84774  | 3.62186   | 0.23975   |
| H           | 1.3853    | 6.00003   | -0.2388   | H           | 0.99817   | 6.05711   | -0.20802  |
| H           | 3.12816   | 5.89105   | 0.0498    | H           | 2.73652   | 6.05194   | 0.12407   |
| H           | 2.45463   | 5.35617   | -1.5      | H           | 2.13603   | 5.49031   | -1.44599  |
| H           | 2.74643   | 2.66494   | -2.1621   | H           | 2.59167   | 2.82909   | -2.11675  |
| H           | 3.7797    | 1.4182    | -1.4844   | H           | 3.69276   | 1.64483   | -1.43377  |
| H           | 4.19256   | 3.63791   | -0.44552  | H           | 3.94753   | 3.87221   | -0.36568  |
| H           | 3.58818   | 2.54263   | 0.78762   | H           | 3.38534   | 2.73247   | 0.84708   |
| H           | -4.34085  | -4.41573  | -0.79588  | H           | -2.92109  | -3.66658  | -1.87085  |
| <b>3a-4</b> | X axis(Å) | Y axis(Å) | Z axis(Å) | <b>3b-1</b> | X axis(Å) | Y axis(Å) | Z axis(Å) |
| C           | -4.98402  | -2.15825  | -1.58074  | C           | 5.05055   | -2.01271  | 1.63142   |
| C           | -4.17479  | -1.04803  | -2.25854  | C           | 4.19268   | -0.92708  | 2.28861   |
| C           | -3.71559  | -0.0691   | -1.16825  | C           | 3.71646   | 0.02739   | 1.18396   |
| C           | -3.0038   | -0.72097  | 0.00647   | C           | 3.03738   | -0.65829  | 0.00941   |
| C           | -3.26817  | -2.0811   | 0.35896   | C           | 3.3588    | -2.00858  | -0.33288  |
| C           | -4.21903  | -2.87477  | -0.47721  | C           | 4.33438   | -2.75948  | 0.51527   |
| C           | -2.10859  | 0.01457   | 0.79244   | C           | 2.11824   | 0.03627   | -0.78648  |
| C           | -1.54583  | -0.59974  | 1.90762   | C           | 1.58795   | -0.60637  | -1.90136  |
| C           | -1.77402  | -1.91074  | 2.27608   | C           | 1.8742    | -1.90841  | -2.26172  |
| C           | -2.63891  | -2.68176  | 1.49155   | C           | 2.76454   | -2.63977  | -1.46748  |
| C           | -3.01411  | -1.6027   | -3.09963  | C           | 3.03929   | -1.51553  | 3.11662   |
| O           | -4.42245  | -4.0718   | -0.29435  | O           | 4.59599   | -3.94468  | 0.33086   |
| C           | -2.86019  | -4.11307  | 1.92302   | C           | 3.04945   | -4.0621   | -1.89139  |
| C           | 3.51065   | -3.1781   | 0.40274   | C           | -3.53683  | -3.29595  | -0.28881  |
| O           | 3.01477   | -3.21838  | 1.51171   | O           | -3.58591  | -4.38148  | 0.2533    |
| C           | 5.57831   | 0.06853   | 0.3254    | C           | -5.61036  | -0.0247   | -0.27659  |
| C           | 5.17497   | -1.37179  | 0.65521   | C           | -5.19436  | -1.46076  | -0.61207  |
| C           | 4.03921   | -1.89921  | -0.27175  | C           | -4.03991  | -1.96928  | 0.30253   |
| C           | 2.83876   | -0.87816  | -0.24131  | C           | -2.84975  | -0.93723  | 0.24999   |
| C           | 3.1754    | 0.63755   | -0.44414  | C           | -3.2034   | 0.57369   | 0.46418   |
| C           | 4.37994   | 1.01575   | 0.4577    | C           | -4.42531  | 0.93781   | -0.42057  |
| C           | 1.6723    | -1.30231  | -1.14644  | C           | -1.66173  | -1.34988  | 1.13183   |
| C           | 0.54038   | -0.31552  | -1.10507  | C           | -0.54585  | -0.34542  | 1.08187   |
| C           | 0.60669   | 0.89837   | -0.53704  | C           | -0.6375   | 0.87187   | 0.52431   |
| C           | 1.91142   | 1.42811   | 0.06561   | C           | -1.95801  | 1.38404   | -0.06025  |
| C           | 3.48209   | 1.00535   | -1.9139   | C           | -3.49404  | 0.93174   | 1.93927   |
| C           | 4.60538   | -2.21933  | -1.67062  | C           | -4.58426  | -2.29011  | 1.70934   |
| C           | -0.65983  | 1.76177   | -0.49036  | C           | 0.61524   | 1.75699   | 0.47508   |
| C           | -0.37612  | 3.26765   | -0.68818  | C           | 0.30689   | 3.25851   | 0.66792   |
| C           | 1.04021   | 3.52234   | -1.16082  | C           | -1.10643  | 3.48876   | 1.16063   |

|   |          |          |          |   |          |          |          |
|---|----------|----------|----------|---|----------|----------|----------|
| C | 2.01799  | 2.97416  | -0.11149 | C | -2.08738 | 2.9275   | 0.12172  |
| C | -1.17359 | 4.32238  | -0.00963 | C | 1.07233  | 4.32524  | -0.02844 |
| C | -0.65084 | 5.72855  | 0.21175  | C | 0.51868  | 5.71954  | -0.24938 |
| C | -1.59372 | 1.44965  | 0.7498   | C | 1.55518  | 1.45371  | -0.76179 |
| C | -2.74377 | 2.4901   | 0.82357  | C | 2.67594  | 2.52466  | -0.85969 |
| C | -0.74777 | 1.49189  | 2.03754  | C | 0.70678  | 1.45092  | -2.04841 |
| O | -0.73508 | 0.24787  | 2.63736  | O | 0.74782  | 0.20294  | -2.64109 |
| O | -0.14209 | 2.41373  | 2.5206   | O | 0.06246  | 2.34243  | -2.53779 |
| C | -2.26392 | 3.93374  | 0.97066  | C | 2.15554  | 3.95201  | -1.02225 |
| O | -1.43568 | 3.96293  | -1.39113 | O | 1.36315  | 3.97832  | 1.35057  |
| O | 3.65097  | -4.30588 | -0.3407  | O | -3.02106 | -3.16339 | -1.54204 |
| H | 1.87403  | 1.23986  | 1.14661  | H | -1.93104 | 1.19966  | -1.14224 |
| H | 2.46979  | -0.94532 | 0.79006  | H | -2.4949  | -0.98725 | -0.78675 |
| H | -1.25594 | 1.48539  | -1.36515 | H | 1.21338  | 1.49469  | 1.35274  |
| H | -5.32544 | -2.92108 | -2.28643 | H | 5.40359  | -2.76106 | 2.34685  |
| H | -5.88277 | -1.72432 | -1.1164  | H | 5.9438   | -1.55164 | 1.1828   |
| H | -4.84152 | -0.49855 | -2.93544 | H | 4.82961  | -0.34966 | 2.97086  |
| H | -3.08527 | 0.70696  | -1.60952 | H | 3.05914  | 0.78898  | 1.61042  |
| H | -4.60274 | 0.45228  | -0.77912 | H | 4.59195  | 0.57071  | 0.79834  |
| H | -1.29102 | -2.32666 | 3.15336  | H | 1.42111  | -2.34609 | -3.14452 |
| H | -2.46717 | -0.79213 | -3.5938  | H | 2.45671  | -0.72088 | 3.59566  |
| H | -3.38876 | -2.27625 | -3.87785 | H | 3.4253   | -2.16911 | 3.90616  |
| H | -2.30004 | -2.16846 | -2.49095 | H | 2.35478  | -2.11118 | 2.50256  |
| H | -2.2984  | -4.31144 | 2.84025  | H | 2.5031   | -4.28788 | -2.81189 |
| H | -3.91799 | -4.32506 | 2.09895  | H | 4.11629  | -4.22934 | -2.06017 |
| H | -2.54286 | -4.81947 | 1.15155  | H | 2.7581   | -4.7787  | -1.11905 |
| H | 6.36921  | 0.38519  | 1.01613  | H | -6.41287 | 0.284    | -0.9575  |
| H | 6.01424  | 0.12995  | -0.67926 | H | -6.0349  | 0.02959  | 0.73301  |
| H | 6.04037  | -2.04242 | 0.5813   | H | -6.04943 | -2.14218 | -0.52254 |
| H | 4.82379  | -1.41313 | 1.69255  | H | -4.86531 | -1.49494 | -1.65681 |
| H | 4.69799  | 2.04326  | 0.24599  | H | -4.75449 | 1.96026  | -0.20175 |
| H | 4.05002  | 1.00345  | 1.50613  | H | -4.1085  | 0.93389  | -1.47332 |
| H | 1.99835  | -1.43745 | -2.18718 | H | -1.96926 | -1.49844 | 2.17607  |
| H | 1.29348  | -2.28456 | -0.83107 | H | -1.27416 | -2.32525 | 0.80588  |
| H | -0.39399 | -0.63932 | -1.55964 | H | 0.39806  | -0.65731 | 1.52492  |
| H | 4.38409  | 0.51448  | -2.28199 | H | -4.38405 | 0.42791  | 2.31808  |
| H | 2.66191  | 0.73852  | -2.58563 | H | -2.66106 | 0.67222  | 2.59798  |
| H | 3.64987  | 2.08177  | -2.01464 | H | -3.67354 | 2.00563  | 2.04678  |
| H | 3.84251  | -2.59894 | -2.35351 | H | -3.80204 | -2.64557 | 2.38312  |
| H | 5.38142  | -2.98567 | -1.59515 | H | -5.32965 | -3.08666 | 1.64188  |
| H | 5.05665  | -1.33746 | -2.12528 | H | -5.05973 | -1.42127 | 2.16348  |
| H | 1.18794  | 3.0223   | -2.12703 | H | -1.23369 | 2.98359  | 2.12704  |
| H | 1.20754  | 4.58756  | -1.32799 | H | -1.28869 | 4.55061  | 1.33332  |

|             |           |           |           |             |           |           |           |
|-------------|-----------|-----------|-----------|-------------|-----------|-----------|-----------|
| H           | 3.03815   | 3.26344   | -0.37617  | H           | -3.10889  | 3.19973   | 0.3987    |
| H           | 1.80396   | 3.45854   | 0.84698   | H           | -1.89228  | 3.41758   | -0.83799  |
| H           | 0.00409   | 6.0582    | -0.5951   | H           | -0.13486  | 6.03906   | 0.5626    |
| H           | -1.49313  | 6.42821   | 0.26266   | H           | 1.34596   | 6.43598   | -0.31138  |
| H           | -0.10595  | 5.78983   | 1.16026   | H           | -0.03685  | 5.76624   | -1.19257  |
| H           | -3.41025  | 2.23327   | 1.65463   | H           | 3.34223   | 2.27399   | -1.69278  |
| H           | -3.32931  | 2.39919   | -0.09437  | H           | 3.27111   | 2.46266   | 0.05441   |
| H           | -1.88416  | 4.10955   | 1.98197   | H           | 1.75453   | 4.10193   | -2.02962  |
| H           | -3.11777  | 4.60906   | 0.82677   | H           | 2.99336   | 4.65175   | -0.9032   |
| H           | 3.299     | -5.03514  | 0.19858   | H           | -2.75393  | -4.05361  | -1.82645  |
| <b>3b-2</b> | X axis(Å) | Y axis(Å) | Z axis(Å) | <b>3b-3</b> | X axis(Å) | Y axis(Å) | Z axis(Å) |
| C           | -4.21713  | -2.90125  | -1.60021  | C           | 4.97885   | -2.21293  | 1.59248   |
| C           | -4.71063  | -1.49676  | -1.2553   | C           | 4.19086   | -1.07886  | 2.25522   |
| C           | -3.48464  | -0.62234  | -0.97312  | C           | 3.7409    | -0.11232  | 1.15015   |
| C           | -2.58041  | -1.18795  | 0.10418   | C           | 3.00729   | -0.77445  | -0.00516  |
| C           | -2.48527  | -2.59858  | 0.30937   | C           | 3.24864   | -2.14432  | -0.33589  |
| C           | -3.2925   | -3.51118  | -0.55448  | C           | 4.2006    | -2.93506  | 0.50148   |
| C           | -1.80729  | -0.33625  | 0.89838   | C           | 2.11347   | -0.04064  | -0.79409  |
| C           | -0.98647  | -0.90153  | 1.87028   | C           | 1.52781   | -0.66731  | -1.89037  |
| C           | -0.86802  | -2.25787  | 2.10054   | C           | 1.7314    | -1.98829  | -2.23611  |
| C           | -1.62233  | -3.13525  | 1.31313   | C           | 2.59537   | -2.75696  | -1.44838  |
| C           | -5.59608  | -0.9074   | -2.35824  | C           | 3.02618   | -1.60043  | 3.11185   |
| O           | -3.22683  | -4.73452  | -0.47121  | O           | 4.39666   | -4.13495  | 0.32917   |
| C           | -1.46782  | -4.61186  | 1.59367   | C           | 2.78775   | -4.19992  | -1.85367  |
| C           | 3.75281   | -2.65797  | 0.24965   | C           | -3.61752  | -3.10655  | -0.41176  |
| O           | 3.28387   | -2.72324  | 1.36928   | O           | -2.70481  | -3.21592  | -1.20619  |
| C           | 5.54863   | 0.74829   | 0.13504   | C           | -5.57645  | 0.19012   | -0.24603  |
| C           | 5.2706    | -0.71879  | 0.4783    | C           | -5.21351  | -1.25592  | -0.59501  |
| C           | 4.18503   | -1.35185  | -0.44242  | C           | -4.05684  | -1.8131   | 0.29549   |
| C           | 2.90262   | -0.43337  | -0.43331  | C           | -2.84488  | -0.81949  | 0.26566   |
| C           | 3.1097    | 1.10285   | -0.63806  | C           | -3.15116  | 0.70427   | 0.47362   |
| C           | 4.2724    | 1.58741   | 0.26726   | C           | -4.36119  | 1.10981   | -0.4073   |
| C           | 1.788     | -0.94253  | -1.35837  | C           | -1.6838   | -1.26099  | 1.17027   |
| C           | 0.54677   | -0.10768  | -1.21361  | C           | -0.53311  | -0.29671  | 1.11484   |
| C           | 0.5087    | 1.08549   | -0.5993   | C           | -0.57882  | 0.91502   | 0.54002   |
| C           | 1.78193   | 1.80004   | -0.15319  | C           | -1.87864  | 1.46951   | -0.05157  |
| C           | 3.40028   | 1.47932   | -2.11048  | C           | -3.43208  | 1.08086   | 1.94694   |
| C           | 4.7846    | -1.65215  | -1.83208  | C           | -4.59189  | -2.15748  | 1.70506   |
| C           | -0.84756  | 1.74595   | -0.33639  | C           | 0.7058    | 1.75028   | 0.47274   |
| C           | -0.8278   | 3.2864    | -0.3203   | C           | 0.45632   | 3.2637    | 0.65578   |
| C           | 0.47068   | 3.96525   | 0.07044   | C           | -0.94591  | 3.55213   | 1.1504    |
| C           | 1.68594   | 3.28664   | -0.56417  | C           | -1.95242  | 3.01815   | 0.12122   |

|   |          |          |          |   |          |          |          |
|---|----------|----------|----------|---|----------|----------|----------|
| C | -2.14159 | 3.94251  | -0.14454 | C | 1.2614   | 4.29399  | -0.05069 |
| C | -2.30719 | 5.33429  | 0.42638  | C | 0.762    | 5.7071   | -0.28149 |
| C | -1.61708 | 1.17413  | 0.9532   | C | 1.62061  | 1.40251  | -0.77215 |
| C | -2.92821 | 1.99571  | 1.2256   | C | 2.78574  | 2.423    | -0.88069 |
| C | -0.69465 | 1.29497  | 2.18177  | C | 0.75964  | 1.43341  | -2.05017 |
| O | -0.30439 | 0.0439   | 2.6118   | O | 0.72089  | 0.17919  | -2.62627 |
| O | -0.32626 | 2.28942  | 2.75105  | O | 0.1621   | 2.35555  | -2.54326 |
| C | -3.30463 | 2.98835  | 0.10906  | C | 2.32668  | 3.87148  | -1.04441 |
| O | -1.53458 | 3.86556  | -1.45555 | O | 1.54153  | 3.94738  | 1.33058  |
| O | 3.9416   | -3.7787  | -0.49372 | O | -4.4157  | -4.16772 | -0.11772 |
| H | 1.81204  | 1.7867   | 0.94741  | H | -1.85643 | 1.27774  | -1.1323  |
| H | 2.52234  | -0.53124 | 0.59172  | H | -2.46897 | -0.89169 | -0.76225 |
| H | -1.49952 | 1.47331  | -1.16937 | H | 1.30344  | 1.47099  | 1.34559  |
| H | -3.65291 | -2.86561 | -2.5461  | H | 5.31012  | -2.97025 | 2.30894  |
| H | -5.03735 | -3.60927 | -1.75382 | H | 5.88354  | -1.80172 | 1.11904  |
| H | -5.30407 | -1.55719 | -0.33073 | H | 4.86979  | -0.52807 | 2.91887  |
| H | -2.91213 | -0.51586 | -1.90903 | H | 3.12838  | 0.68338  | 1.58132  |
| H | -3.80221 | 0.38532  | -0.69926 | H | 4.63428  | 0.38511  | 0.74419  |
| H | -0.19989 | -2.62762 | 2.87034  | H | 1.22827  | -2.41475 | -3.09675 |
| H | -5.95669 | 0.09169  | -2.08849 | H | 2.49415  | -0.77279 | 3.59391  |
| H | -6.4711  | -1.54076 | -2.5399  | H | 3.39463  | -2.26549 | 3.9003   |
| H | -5.04434 | -0.82118 | -3.30248 | H | 2.3005   | -2.16594 | 2.51688  |
| H | -0.76661 | -4.75751 | 2.42018  | H | 2.20376  | -4.40942 | -2.75438 |
| H | -2.42354 | -5.07706 | 1.84926  | H | 3.83862  | -4.43059 | -2.04682 |
| H | -1.10363 | -5.15286 | 0.71641  | H | 2.47629  | -4.88502 | -1.06095 |
| H | 6.31238  | 1.13633  | 0.81983  | H | -6.38142 | 0.52675  | -0.91064 |
| H | 5.97227  | 0.84053  | -0.8726  | H | -5.98006 | 0.25078  | 0.77202  |
| H | 6.19045  | -1.31332 | 0.4099   | H | -6.08551 | -1.91275 | -0.50225 |
| H | 4.92495  | -0.77988 | 1.51639  | H | -4.89752 | -1.28836 | -1.64641 |
| H | 4.49527  | 2.63989  | 0.05555  | H | -4.65143 | 2.14487  | -0.19268 |
| H | 3.94497  | 1.54223  | 1.3154   | H | -4.05265 | 1.0873   | -1.46226 |
| H | 2.11331  | -0.96447 | -2.40756 | H | -2.00771 | -1.37827 | 2.2142   |
| H | 1.53465  | -1.98219 | -1.10935 | H | -1.32886 | -2.25037 | 0.85539  |
| H | -0.37657 | -0.54739 | -1.58505 | H | 0.39908  | -0.63727 | 1.56177  |
| H | 4.24772  | 0.92764  | -2.51762 | H | -4.34376 | 0.61585  | 2.32566  |
| H | 2.54009  | 1.2887   | -2.75886 | H | -2.61256 | 0.79348  | 2.61056  |
| H | 3.64412  | 2.54207  | -2.19505 | H | -3.57041 | 2.16148  | 2.04793  |
| H | 4.04835  | -2.06479 | -2.52505 | H | -3.83165 | -2.64272 | 2.32324  |
| H | 5.59105  | -2.38467 | -1.74191 | H | -5.43964 | -2.84174 | 1.63194  |
| H | 5.20808  | -0.75416 | -2.28239 | H | -4.92614 | -1.26354 | 2.23135  |
| H | 0.56068  | 3.94464  | 1.16271  | H | -1.08822 | 3.06143  | 2.12224  |
| H | 0.42778  | 5.01167  | -0.24136 | H | -1.08745 | 4.6218   | 1.31319  |
| H | 1.6115   | 3.37111  | -1.65405 | H | -2.96183 | 3.32864  | 0.40278  |



|             |           |           |           |            |           |           |           |
|-------------|-----------|-----------|-----------|------------|-----------|-----------|-----------|
| H           | 2.593     | 3.81996   | -0.26016  | H          | -1.74619  | 3.49457   | -0.84303  |
| H           | -1.42949  | 5.95859   | 0.25641   | H          | 0.12464   | 6.05863   | 0.53017   |
| H           | -3.16875  | 5.82309   | -0.04335  | H          | 1.61649   | 6.39005   | -0.35244  |
| H           | -2.49449  | 5.28483   | 1.50532   | H          | 0.20513   | 5.76759   | -1.22308  |
| H           | -2.78262  | 2.57173   | 2.14535   | H          | 3.43494   | 2.14162   | -1.71747  |
| H           | -3.75325  | 1.30362   | 1.41963   | H          | 3.38411   | 2.33791   | 0.02946   |
| H           | -4.19859  | 3.54224   | 0.41662   | H          | 1.93092   | 4.03621   | -2.05147  |
| H           | -3.55572  | 2.47651   | -0.82449  | H          | 3.19378   | 4.53511   | -0.92781  |
| H           | 3.6429    | -4.52491  | 0.05437   | H          | -4.09641  | -4.91048  | -0.65794  |
| <b>3b-4</b> | X axis(Å) | Y axis(Å) | Z axis(Å) | <b>4-1</b> | X axis(Å) | Y axis(Å) | Z axis(Å) |
| C           | -4.2333   | -2.90902  | -1.62998  | C          | -5.58501  | -1.87276  | -0.64727  |
| C           | -4.73328  | -1.51367  | -1.25847  | C          | -4.59246  | -3.01106  | -0.90104  |
| C           | -3.5113   | -0.63714  | -0.96637  | C          | -3.42741  | -3.03139  | 0.13994   |
| C           | -2.59447  | -1.21738  | 0.09242   | C          | -2.77092  | -1.61074  | 0.22936   |
| C           | -2.49144  | -2.6308   | 0.2734    | C          | -3.72739  | -0.37321  | 0.33235   |
| C           | -3.30647  | -3.53255  | -0.5943   | C          | -4.87611  | -0.51539  | -0.69878  |
| C           | -1.81591  | -0.37561  | 0.89207   | C          | -1.67376  | -1.51595  | 1.30112   |
| C           | -0.98159  | -0.95367  | 1.84463   | C          | -1.04082  | -0.1521   | 1.32245   |
| C           | -0.85363  | -2.31276  | 2.04972   | C          | -1.5167   | 0.92091   | 0.67076   |
| C           | -1.61317  | -3.18022  | 1.25685   | C          | -2.85744  | 0.87733   | -0.0682   |
| C           | -5.62709  | -0.91004  | -2.34687  | C          | -0.68504  | 2.21102   | 0.65085   |
| O           | -3.24656  | -4.75691  | -0.52201  | C          | -1.55017  | 3.47011   | 0.57795   |
| C           | -1.44449  | -4.66051  | 1.50714   | C          | -2.95512  | 3.20351   | 1.05856   |
| C           | 3.85554   | -2.5987   | 0.27723   | C          | -3.62014  | 2.23635   | 0.06038   |
| O           | 2.92135   | -2.78205  | 1.03224   | C          | -4.31867  | -0.1851   | 1.74998   |
| C           | 5.54501   | 0.84179   | 0.03472   | C          | -2.38823  | -3.99343  | -0.45988  |
| C           | 5.30797   | -0.62479  | 0.40666   | O          | -1.38171  | -3.6858   | -1.06762  |
| C           | 4.191     | -1.29033  | -0.46066  | O          | -2.73276  | -5.30116  | -0.30612  |
| C           | 2.90376   | -0.39556  | -0.44805  | C          | 5.60554   | -0.40943  | 1.47605   |
| C           | 3.08373   | 1.14429   | -0.66711  | C          | 4.20824   | -0.36305  | 2.13765   |
| C           | 4.2586    | 1.65675   | 0.20492   | C          | 3.20219   | -0.3819   | 0.9453    |
| C           | 1.7869    | -0.92169  | -1.36193  | C          | 4.03963   | -0.5653   | -0.35153  |
| C           | 0.5363    | -0.10239  | -1.20699  | C          | 5.3825    | -1.13006  | 0.13763   |
| C           | 0.48652   | 1.09056   | -0.59279  | C          | 2.27888   | 0.84397   | 0.89883   |
| C           | 1.75541   | 1.82162   | -0.15928  | C          | 1.46634   | 1.07226   | -0.29193  |
| C           | 3.33724   | 1.52042   | -2.14705  | C          | 1.41566   | 0.29436   | -1.41528  |
| C           | 4.74745   | -1.63226  | -1.86331  | C          | 2.10724   | -0.88457  | -1.88309  |
| C           | -0.87684  | 1.73227   | -0.31629  | C          | 3.3083    | -1.32317  | -1.44132  |
| C           | -0.87606  | 3.27289   | -0.28247  | C          | 0.46435   | 2.20694   | -0.43673  |
| C           | 0.41795   | 3.96399   | 0.10086   | O          | 0.4741    | 0.7546    | -2.31792  |
| C           | 1.63278   | 3.3091    | -0.55832  | C          | 3.96937   | -1.52003  | 3.11932   |
| C           | -2.19481  | 3.91296   | -0.08554  | C          | 3.93857   | -2.54151  | -2.05711  |

|   |          |          |          |   |          |          |          |
|---|----------|----------|----------|---|----------|----------|----------|
| C | -2.3693  | 5.29671  | 0.50227  | C | 1.17146  | 3.58984  | -0.38761 |
| C | -1.63163 | 1.13462  | 0.97064  | O | 6.37593  | -0.89139 | -0.85254 |
| C | -2.94352 | 1.94405  | 1.27188  | C | 7.62819  | -1.50297 | -0.58394 |
| C | -0.69486 | 1.2386   | 2.18973  | O | 2.18476  | 1.58958  | 1.87773  |
| O | -0.29492 | -0.01713 | 2.59441  | C | -0.10554 | 1.92233  | -1.82517 |
| O | -0.32209 | 2.22568  | 2.7696   | O | -0.9086  | 2.52244  | -2.48814 |
| C | -3.34468 | 2.94423  | 0.17102  | C | 0.22503  | 4.76895  | -0.6102  |
| O | -1.60168 | 3.85677  | -1.40376 | C | -1.12625 | 4.63539  | 0.0534   |
| O | 4.7762   | -3.57626 | 0.06076  | C | -1.94925 | 5.89923  | -0.03494 |
| H | 1.80202  | 1.80184  | 0.94081  | H | 4.27271  | 0.43413  | -0.75617 |
| H | 2.52325  | -0.49305 | 0.57618  | C | -3.9303  | -3.61236 | 1.48324  |
| H | -1.52998 | 1.46187  | -1.14916 | H | -2.26096 | -1.49262 | -0.73467 |
| H | -3.6689  | -2.85249 | -2.57477 | H | -2.63433 | 0.74582  | -1.13608 |
| H | -5.05015 | -3.61796 | -1.79655 | H | -0.13397 | 2.23972  | 1.59855  |
| H | -5.32231 | -1.59397 | -0.33256 | H | 2.5264   | -1.24506 | 1.04913  |
| H | -2.94614 | -0.50715 | -1.90382 | H | -6.37061 | -1.90728 | -1.41203 |
| H | -3.83438 | 0.36216  | -0.66961 | H | -6.09302 | -2.01247 | 0.31483  |
| H | -0.17042 | -2.693   | 2.8006   | H | -5.09767 | -3.98304 | -0.89223 |
| H | -5.99163 | 0.08233  | -2.05817 | H | -4.16812 | -2.87989 | -1.90591 |
| H | -6.49963 | -1.54483 | -2.53543 | H | -5.60521 | 0.29132  | -0.5591  |
| H | -5.08026 | -0.80448 | -3.29202 | H | -4.46122 | -0.38526 | -1.7086  |
| H | -0.72571 | -4.81631 | 2.31641  | H | -2.06398 | -1.75941 | 2.29952  |
| H | -2.39217 | -5.13663 | 1.77232  | H | -0.89544 | -2.26178 | 1.09519  |
| H | -1.09244 | -5.18208 | 0.61338  | H | -0.11892 | -0.05693 | 1.89325  |
| H | 6.32916  | 1.25175  | 0.6828   | H | -3.54784 | 4.11639  | 1.1396   |
| H | 5.92584  | 0.92389  | -0.99063 | H | -2.93629 | 2.74632  | 2.05831  |
| H | 6.22994  | -1.20867 | 0.31149  | H | -3.6486  | 2.72769  | -0.91751 |
| H | 5.01013  | -0.66728 | 1.46317  | H | -4.66141 | 2.0714   | 0.35149  |
| H | 4.45487  | 2.71249  | -0.01581 | H | -3.54009 | -0.04631 | 2.50427  |
| H | 3.96271  | 1.60888  | 1.26256  | H | -4.96706 | 0.69478  | 1.78684  |
| H | 2.10117  | -0.93867 | -2.41491 | H | -4.93168 | -1.03373 | 2.05782  |
| H | 1.55179  | -1.96096 | -1.10121 | H | -2.05359 | -5.82058 | -0.76867 |
| H | -0.38429 | -0.55497 | -1.56981 | H | 5.96718  | 0.60354  | 1.25917  |
| H | 4.18915  | 0.98674  | -2.56948 | H | 6.3495   | -0.89904 | 2.1126   |
| H | 2.46928  | 1.30916  | -2.77801 | H | 4.0763   | 0.574    | 2.68435  |
| H | 3.55668  | 2.58783  | -2.23982 | H | 5.30501  | -2.21691 | 0.30965  |
| H | 4.00544  | -2.14258 | -2.48363 | H | 1.60917  | -1.40204 | -2.69803 |
| H | 5.61356  | -2.29106 | -1.77588 | H | 2.95708  | -1.47401 | 3.53593  |
| H | 5.06405  | -0.73437 | -2.3942  | H | 4.67537  | -1.47362 | 3.95604  |
| H | 0.35723  | 5.01373  | -0.19639 | H | 4.08775  | -2.49858 | 2.63679  |
| H | 0.52246  | 3.92984  | 1.19161  | H | 3.32292  | -2.93796 | -2.86784 |
| H | 1.5395   | 3.4011   | -1.64623 | H | 4.93593  | -2.3044  | -2.44244 |
| H | 2.53649  | 3.85374  | -0.26454 | H | 4.06894  | -3.33672 | -1.3116  |

|            |           |           |           |            |           |           |           |
|------------|-----------|-----------|-----------|------------|-----------|-----------|-----------|
| H          | -1.50043  | 5.93262   | 0.33009   | H          | 1.98365   | 3.61215   | -1.12379  |
| H          | -3.24111  | 5.78097   | 0.04694   | H          | 1.63331   | 3.65428   | 0.60152   |
| H          | -2.5448   | 5.23351   | 1.58249   | H          | 8.26709   | -1.3088   | -1.44817  |
| H          | -2.78707  | 2.51279   | 2.19445   | H          | 8.10595   | -1.08452  | 0.31218   |
| H          | -3.76026  | 1.24407   | 1.47272   | H          | 7.52168   | -2.59105  | -0.45338  |
| H          | -4.24059  | 3.48532   | 0.49534   | H          | 0.72163   | 5.68498   | -0.25973  |
| H          | -3.6014   | 2.44017   | -0.76512  | H          | 0.05142   | 4.91962   | -1.68579  |
| H          | 4.51121   | -4.33176  | 0.61235   | H          | -2.93419  | 5.82165   | 0.42672   |
|            |           |           |           | H          | -1.42202  | 6.73401   | 0.44621   |
|            |           |           |           | H          | -2.09454  | 6.18684   | -1.0855   |
|            |           |           |           | H          | -4.69067  | -2.97264  | 1.93095   |
|            |           |           |           | H          | -4.37014  | -4.59964  | 1.32791   |
|            |           |           |           | H          | -3.11964  | -3.72257  | 2.20879   |
| <b>4-2</b> | X axis(Å) | Y axis(Å) | Z axis(Å) | <b>4-3</b> | X axis(Å) | Y axis(Å) | Z axis(Å) |
| C          | -5.67877  | -1.82436  | -0.62458  | C          | -5.58521  | -1.87248  | -0.64689  |
| C          | -4.7105   | -2.9778   | -0.90867  | C          | -4.59268  | -3.01079  | -0.90076  |
| C          | -3.54341  | -3.03655  | 0.12197   | C          | -3.42756  | -3.03115  | 0.14014   |
| C          | -2.84418  | -1.62415  | 0.19417   | C          | -2.77103  | -1.61054  | 0.22955   |
| C          | -3.77112  | -0.37184  | 0.34729   | C          | -3.72747  | -0.373    | 0.33262   |
| C          | -4.94687  | -0.4776   | -0.65906  | C          | -4.87628  | -0.51512  | -0.69842  |
| C          | -1.70092  | -1.57101  | 1.21811   | C          | -1.67382  | -1.51579  | 1.30126   |
| C          | -1.04773  | -0.21736  | 1.25308   | C          | -1.04083  | -0.15195  | 1.32253   |
| C          | -1.52866  | 0.88035   | 0.64758   | C          | -1.51672  | 0.92105   | 0.67082   |
| C          | -2.88998  | 0.87116   | -0.05575  | C          | -2.85753  | 0.87752   | -0.06799  |
| C          | -0.68216  | 2.16343   | 0.6522    | C          | -0.68495  | 2.21109   | 0.65068   |
| C          | -1.53424  | 3.43249   | 0.60478   | C          | -1.54996  | 3.47023   | 0.57754   |
| C          | -2.93028  | 3.17603   | 1.11487   | C          | -2.95485  | 3.20387   | 1.05845   |
| C          | -3.63156  | 2.23677   | 0.11589   | C          | -3.6202   | 2.23658   | 0.06063   |
| C          | -4.31619  | -0.20204  | 1.78467   | C          | -4.31862  | -0.18491  | 1.75031   |
| C          | -2.50686  | -4.039    | -0.40865  | C          | -2.38848  | -3.99324  | -0.4598   |
| O          | -2.15596  | -5.06337  | 0.1423    | O          | -1.38186  | -3.68565  | -1.06739  |
| O          | -1.98861  | -3.6871   | -1.61838  | O          | -2.73324  | -5.30094  | -0.30633  |
| C          | 5.60262   | -0.43436  | 1.53863   | C          | 5.60628   | -0.40857  | 1.47518   |
| C          | 4.18628   | -0.43368  | 2.1597    | C          | 4.20929   | -0.36173  | 2.13742   |
| C          | 3.21608   | -0.4195   | 0.93829   | C          | 3.20264   | -0.38159  | 0.94556   |
| C          | 4.09342   | -0.54718  | -0.33907  | C          | 4.03948   | -0.56565  | -0.35152  |
| C          | 5.4303    | -1.11003  | 0.16973   | C          | 5.3826    | -1.13006  | 0.13733   |
| C          | 2.28432   | 0.8005    | 0.90401   | C          | 2.27894   | 0.84398   | 0.8989    |
| C          | 1.48188   | 1.04012   | -0.29232  | C          | 1.46632   | 1.07197   | -0.29186  |
| C          | 1.46943   | 0.29346   | -1.43709  | C          | 1.41546   | 0.29371   | -1.41495  |
| C          | 2.20556   | -0.84805  | -1.93094  | C          | 2.10662   | -0.88565  | -1.88228  |
| C          | 3.4075    | -1.27431  | -1.47804  | C          | 3.3077    | -1.32421  | -1.44054  |
| C          | 0.46815   | 2.16555   | -0.43074  | C          | 0.46442   | 2.20668   | -0.43693  |

|   |          |          |          |   |          |          |          |
|---|----------|----------|----------|---|----------|----------|----------|
| O | 0.52976  | 0.75295  | -2.34213 | O | 0.47389  | 0.75382  | -2.31768 |
| C | 3.93612  | -1.63211 | 3.08743  | C | 3.97097  | -1.51792 | 3.12014  |
| C | 4.08908  | -2.44237 | -2.13545 | C | 3.93749  | -2.5432  | -2.05552 |
| C | 1.17652  | 3.5495   | -0.37824 | C | 1.17161  | 3.58956  | -0.38817 |
| O | 6.44768  | -0.82192 | -0.78193 | O | 6.37553  | -0.89201 | -0.85349 |
| C | 7.70268  | -1.42103 | -0.49618 | C | 7.62794  | -1.50337 | -0.58511 |
| O | 2.17355  | 1.53024  | 1.8923   | O | 2.18468  | 1.58968  | 1.87772  |
| C | -0.09314 | 1.88847  | -1.82432 | C | -0.10552 | 1.92174  | -1.82528 |
| O | -0.91712 | 2.47248  | -2.4751  | O | -0.90852 | 2.5218   | -2.48839 |
| C | 0.23057  | 4.72776  | -0.60102 | C | 0.22522  | 4.76864  | -0.61108 |
| C | -1.11141 | 4.59865  | 0.08145  | C | -1.12602 | 4.63534  | 0.05264  |
| C | -1.92592 | 5.86943  | 0.01795  | C | -1.949   | 5.89917  | -0.03601 |
| H | 4.32428  | 0.46856  | -0.70284 | H | 4.2723   | 0.43358  | -0.75679 |
| C | -4.05518 | -3.59903 | 1.46375  | C | -3.93038 | -3.61214 | 1.48347  |
| H | -2.38157 | -1.50075 | -0.79287 | H | -2.26112 | -1.4924  | -0.7345  |
| H | -2.69575 | 0.75613  | -1.13116 | H | -2.63452 | 0.74603  | -1.1359  |
| H | -0.13523 | 2.16954  | 1.60282  | H | -0.13385 | 2.23992  | 1.59837  |
| H | 2.54684  | -1.2922  | 0.9911   | H | 2.52711  | -1.24485 | 1.05035  |
| H | -6.47119 | -1.82774 | -1.383   | H | -6.37086 | -1.90699 | -1.4116  |
| H | -6.18276 | -1.96915 | 0.3386   | H | -6.09315 | -2.01221 | 0.31523  |
| H | -5.24044 | -3.93857 | -0.90477 | H | -5.0979  | -3.98277 | -0.89192 |
| H | -4.29521 | -2.84513 | -1.91393 | H | -4.16844 | -2.87963 | -1.90567 |
| H | -5.66001 | 0.3367   | -0.48536 | H | -5.60534 | 0.29161  | -0.55868 |
| H | -4.55214 | -0.33068 | -1.67461 | H | -4.46147 | -0.38499 | -1.70827 |
| H | -2.05111 | -1.83941 | 2.22425  | H | -2.06399 | -1.75923 | 2.29968  |
| H | -0.94056 | -2.32539 | 0.96957  | H | -0.89552 | -2.26163 | 1.09529  |
| H | -0.11151 | -0.15014 | 1.80377  | H | -0.11885 | -0.05681 | 1.89321  |
| H | -3.50812 | 4.09494  | 1.22811  | H | -3.54746 | 4.11683  | 1.13946  |
| H | -2.89279 | 2.70003  | 2.10527  | H | -2.93586 | 2.74687  | 2.05829  |
| H | -3.67743 | 2.74648  | -0.85189 | H | -3.649   | 2.72776  | -0.91733 |
| H | -4.66739 | 2.07884  | 0.42901  | H | -4.66136 | 2.07167  | 0.35215  |
| H | -3.51206 | -0.08683 | 2.51611  | H | -3.53998 | -0.04622 | 2.50454  |
| H | -4.95129 | 0.68527  | 1.85748  | H | -4.96696 | 0.695    | 1.78729  |
| H | -4.92822 | -1.04935 | 2.09599  | H | -4.93166 | -1.03352 | 2.05815  |
| H | -1.36814 | -4.39253 | -1.86684 | H | -2.05411 | -5.82038 | -0.76893 |
| H | 5.95349  | 0.59125  | 1.36855  | H | 5.96787  | 0.60425  | 1.25748  |
| H | 6.33572  | -0.93502 | 2.17901  | H | 6.35053  | -0.89779 | 2.1117   |
| H | 4.02491  | 0.47947  | 2.73793  | H | 4.07754  | 0.57574  | 2.68344  |
| H | 5.36428  | -2.20332 | 0.30129  | H | 5.30523  | -2.2168  | 0.31009  |
| H | 1.7489   | -1.33672 | -2.78723 | H | 1.60813  | -1.40358 | -2.69667 |
| H | 2.9116   | -1.61738 | 3.47538  | H | 2.95887  | -1.47162 | 3.53719  |
| H | 4.61639  | -1.60884 | 3.94602  | H | 4.67737  | -1.4708  | 3.95647  |
| H | 4.08345  | -2.58923 | 2.57118  | H | 4.08918  | -2.49685 | 2.63833  |

|            |           |           |           |            |           |           |           |
|------------|-----------|-----------|-----------|------------|-----------|-----------|-----------|
| H          | 3.50734   | -2.81608  | -2.98154  | H          | 3.32145   | -2.94019  | -2.8657   |
| H          | 5.08778   | -2.15686  | -2.48222  | H          | 4.93476   | -2.30665  | -2.44141  |
| H          | 4.22712   | -3.26883  | -1.42628  | H          | 4.06793   | -3.33781  | -1.30938  |
| H          | 1.99055   | 3.57185   | -1.11236  | H          | 1.9838    | 3.61162   | -1.12435  |
| H          | 1.6354    | 3.61266   | 0.61247   | H          | 1.63344   | 3.65424   | 0.60095   |
| H          | 8.36258   | -1.18791  | -1.33454  | H          | 8.26642   | -1.30972  | -1.44977  |
| H          | 8.14645   | -1.0238   | 0.42651   | H          | 8.10611   | -1.08434  | 0.31052   |
| H          | 7.61155   | -2.5143   | -0.4038   | H          | 7.52154   | -2.59137  | -0.45382  |
| H          | 0.73219   | 5.64534   | -0.2622   | H          | 0.72189   | 5.68476   | -0.26091  |
| H          | 0.04583   | 4.87115   | -1.67581  | H          | 0.05159   | 4.91898   | -1.68671  |
| H          | -2.90986  | 5.79103   | 0.48148   | H          | -2.9338   | 5.82182   | 0.42598   |
| H          | -1.39115  | 6.69268   | 0.51054   | H          | -1.42159  | 6.73415   | 0.4446    |
| H          | -2.0731   | 6.17512   | -1.02717  | H          | -2.0946   | 6.18633   | -1.08666  |
| H          | -4.87536  | -3.00212  | 1.86165   | H          | -4.69077  | -2.97245  | 1.93119   |
| H          | -4.41986  | -4.61944  | 1.3193    | H          | -4.37016  | -4.59945  | 1.32818   |
| H          | -3.2674   | -3.64757  | 2.218     | H          | -3.11968  | -3.72229  | 2.20899   |
| <b>4-4</b> | X axis(Å) | Y axis(Å) | Z axis(Å) | <b>4-5</b> | X axis(Å) | Y axis(Å) | Z axis(Å) |
| C          | -5.67937  | -1.42367  | -0.70547  | C          | -5.6792   | -1.42391  | -0.70561  |
| C          | -4.79042  | -2.64417  | -0.96077  | C          | -4.79024  | -2.64443  | -0.96077  |
| C          | -3.6406   | -2.77708  | 0.08948   | C          | -3.64043  | -2.77722  | 0.08954   |
| C          | -2.86161  | -1.42116  | 0.19894   | C          | -2.86148  | -1.42127  | 0.19889   |
| C          | -3.70587  | -0.10439  | 0.30417   | C          | -3.70577  | -0.10451  | 0.30403   |
| C          | -4.85104  | -0.13517  | -0.73942  | C          | -4.85089  | -0.1354   | -0.73962  |
| C          | -1.77203  | -1.43327  | 1.28222   | C          | -1.7719   | -1.4333   | 1.28217   |
| C          | -1.01936  | -0.13218  | 1.32018   | C          | -1.01929  | -0.13217  | 1.32012   |
| C          | -1.3916   | 0.98398   | 0.67369   | C          | -1.39154  | 0.98395   | 0.67358   |
| C          | -2.72417  | 1.06752   | -0.07588  | C          | -2.72408  | 1.0674    | -0.07606  |
| C          | -0.44804  | 2.1943    | 0.67104   | C          | -0.44808  | 2.19433   | 0.67101   |
| C          | -1.19647  | 3.52701   | 0.61455   | C          | -1.19658  | 3.52701   | 0.61464   |
| C          | -2.62413  | 3.37976   | 1.07959   | C          | -2.62432  | 3.37964   | 1.07945   |
| C          | -3.36255  | 2.48853   | 0.06217   | C          | -3.36249  | 2.4884    | 0.06186   |
| C          | -4.2935   | 0.12323   | 1.71754   | C          | -4.29344  | 0.12316   | 1.71737   |
| C          | -2.68528  | -3.82164  | -0.51175  | C          | -2.685    | -3.82176  | -0.51155  |
| O          | -1.65193  | -3.59833  | -1.11156  | O          | -1.6516   | -3.59843  | -1.11124  |
| O          | -3.14305  | -5.09533  | -0.37002  | O          | -3.1428   | -5.09545  | -0.36987  |
| C          | 5.07933   | -2.02756  | 1.56823   | C          | 5.07895   | -2.0278   | 1.56816   |
| C          | 4.10264   | -0.96684  | 2.10276   | C          | 4.10236   | -0.96699  | 2.10271   |
| C          | 3.14987   | -0.77304  | 0.90556   | C          | 3.14973   | -0.77295  | 0.90545   |
| C          | 4.01404   | -0.97321  | -0.38038  | C          | 4.01398   | -0.97315  | -0.38045  |
| C          | 5.34163   | -1.63935  | 0.11152   | C          | 5.34146   | -1.63946  | 0.11154   |
| C          | 2.3762    | 0.54483   | 0.89551   | C          | 2.37623   | 0.54501   | 0.89542   |
| C          | 1.58581   | 0.87664   | -0.28951  | C          | 1.58586   | 0.87686   | -0.2896   |
| C          | 1.47487   | 0.13099   | -1.42865  | C          | 1.47484   | 0.13119   | -1.42873  |

|   |          |          |          |   |          |          |          |
|---|----------|----------|----------|---|----------|----------|----------|
| C | 2.0636   | -1.09672 | -1.91715 | C | 2.06357  | -1.0965  | -1.91728 |
| C | 3.22295  | -1.64759 | -1.48808 | C | 3.22291  | -1.64742 | -1.48824 |
| C | 0.69656  | 2.10211  | -0.41672 | C | 0.6966   | 2.10231  | -0.41675 |
| O | 0.587    | 0.69361  | -2.32909 | O | 0.58693  | 0.69381  | -2.32912 |
| C | 3.41348  | -1.35832 | 3.41136  | C | 3.41303  | -1.35847 | 3.41122  |
| C | 3.72823  | -2.90871 | -2.13622 | C | 3.72824  | -2.90845 | -2.1365  |
| C | 1.53007  | 3.41192  | -0.34106 | C | 1.53     | 3.41217  | -0.3409  |
| O | 6.42235  | -0.70223 | 0.10346  | O | 6.42224  | -0.70239 | 0.10374  |
| C | 6.98323  | -0.46662 | -1.17536 | C | 6.98336  | -0.46673 | -1.17497 |
| O | 2.3871   | 1.28736  | 1.88003  | O | 2.38714  | 1.28748  | 1.87996  |
| C | 0.10961  | 1.8974   | -1.81276 | C | 0.10963  | 1.89767  | -1.8128  |
| O | -0.63277 | 2.58054  | -2.46594 | O | -0.63275 | 2.58081  | -2.46596 |
| C | 0.69775  | 4.67782  | -0.5426  | C | 0.69763  | 4.67805  | -0.54227 |
| C | -0.6646  | 4.65714  | 0.11187  | C | -0.66473 | 4.65724  | 0.11219  |
| C | -1.3692  | 5.9915   | 0.03888  | C | -1.36941 | 5.99156  | 0.03937  |
| H | 4.29045  | 0.02413  | -0.75492 | H | 4.29054  | 0.02416  | -0.75497 |
| C | -4.20471 | -3.32336 | 1.42296  | C | -4.20458 | -3.32338 | 1.42305  |
| H | -2.33316 | -1.3404  | -0.75896 | H | -2.33303 | -1.34059 | -0.75902 |
| H | -2.50485 | 0.92764  | -1.14352 | H | -2.50472 | 0.92743  | -1.14369 |
| H | 0.10293  | 2.16037  | 1.61889  | H | 0.10289  | 2.16036  | 1.61885  |
| H | 2.39008  | -1.572   | 0.93213  | H | 2.38985  | -1.57184 | 0.93187  |
| H | -6.45788 | -1.38173 | -1.47707 | H | -6.45766 | -1.38203 | -1.47726 |
| H | -6.20656 | -1.52471 | 0.25109  | H | -6.20644 | -1.52489 | 0.25093  |
| H | -5.38044 | -3.56717 | -0.9642  | H | -5.38023 | -3.56744 | -0.9641  |
| H | -4.34744 | -2.54371 | -1.96113 | H | -4.34723 | -2.54406 | -1.96112 |
| H | -5.50593 | 0.733    | -0.6007  | H | -5.5058  | 0.73277  | -0.601   |
| H | -4.41529 | -0.03605 | -1.74395 | H | -4.41509 | -0.03635 | -1.74413 |
| H | -2.19287 | -1.64742 | 2.27481  | H | -2.19273 | -1.64744 | 2.27476  |
| H | -1.06178 | -2.24475 | 1.07851  | H | -1.06162 | -2.24476 | 1.07849  |
| H | -0.0977  | -0.12492 | 1.89921  | H | -0.09766 | -0.12486 | 1.89921  |
| H | -3.13441 | 4.34048  | 1.16819  | H | -3.13469 | 4.34032  | 1.16795  |
| H | -2.65582 | 2.90943  | 2.07286  | H | -2.65614 | 2.90929  | 2.0727   |
| H | -3.3355  | 2.99182  | -0.90967 | H | -3.33522 | 2.9917   | -0.90997 |
| H | -4.41767 | 2.41474  | 0.34034  | H | -4.41767 | 2.4146   | 0.33977  |
| H | -3.51413 | 0.18652  | 2.48104  | H | -3.51409 | 0.18654  | 2.48087  |
| H | -4.86212 | 1.05659  | 1.75598  | H | -4.86212 | 1.05648  | 1.75573  |
| H | -4.98242 | -0.67038 | 2.01135  | H | -4.98231 | -0.67048 | 2.01121  |
| H | -2.50874 | -5.66887 | -0.83233 | H | -2.50838 | -5.66902 | -0.83198 |
| H | 6.01321  | -2.09193 | 2.13408  | H | 6.01275  | -2.0924  | 2.13412  |
| H | 4.59919  | -3.01622 | 1.59748  | H | 4.59862  | -3.01639 | 1.59723  |
| H | 4.64851  | -0.02883 | 2.25933  | H | 4.64836  | -0.02907 | 2.25939  |
| H | 5.63284  | -2.50479 | -0.49731 | H | 5.63271  | -2.50483 | -0.49735 |
| H | 1.51893  | -1.55614 | -2.73724 | H | 1.51894  | -1.55585 | -2.73744 |

|   |          |          |          |   |          |          |          |
|---|----------|----------|----------|---|----------|----------|----------|
| H | 2.73717  | -0.56858 | 3.74802  | H | 2.73677  | -0.56867 | 3.74785  |
| H | 4.15226  | -1.53128 | 4.20229  | H | 4.1517   | -1.53154 | 4.20222  |
| H | 2.83494  | -2.2838  | 3.2895   | H | 2.8344   | -2.28387 | 3.28925  |
| H | 3.02867  | -3.26473 | -2.89617 | H | 3.02872  | -3.26439 | -2.89654 |
| H | 4.70233  | -2.74981 | -2.61526 | H | 4.70236  | -2.74947 | -2.61548 |
| H | 3.86731  | -3.70997 | -1.39943 | H | 3.86729  | -3.7098  | -1.39981 |
| H | 2.34273  | 3.37226  | -1.07604 | H | 1.9939   | 3.41377  | 0.64926  |
| H | 1.99398  | 3.41363  | 0.6491   | H | 2.34268  | 3.37265  | -1.07587 |
| H | 7.80952  | 0.23372  | -1.03581 | H | 7.80969  | 0.23352  | -1.03523 |
| H | 7.37226  | -1.39695 | -1.61777 | H | 7.37236  | -1.39705 | -1.6174  |
| H | 6.26014  | -0.0206  | -1.87496 | H | 6.26042  | -0.02057 | -1.87466 |
| H | 1.27502  | 5.53649  | -0.17123 | H | 1.27486  | 5.53671  | -0.17081 |
| H | 0.54503  | 4.86585  | -1.61552 | H | 0.54488  | 4.86621  | -1.61517 |
| H | -2.35769 | 5.99778  | 0.49939  | H | -2.35774 | 5.99779  | 0.50022  |
| H | -0.76907 | 6.76877  | 0.53071  | H | -0.76914 | 6.76885  | 0.53102  |
| H | -1.48623 | 6.30421  | -1.00805 | H | -1.48679 | 6.30429  | -1.00751 |
| H | -4.90863 | -2.62241 | 1.87125  | H | -4.90869 | -2.62249 | 1.87114  |
| H | -4.7295  | -4.26599 | 1.25465  | H | -4.72917 | -4.26614 | 1.25485  |
| H | -3.41323 | -3.51206 | 2.15347  | H | -3.41315 | -3.5118  | 2.1537   |

**Table S2.** DP4+ analysis results of **3a** (isomer1) and **3b** (Isomer 2)

| Functional<br>mPW1PW91 |      | Solvent?<br>PCM |          | Basis Set<br>6-311+G(d, p) |          | Type of Data<br>Unscaled Shifts |          |  |
|------------------------|------|-----------------|----------|----------------------------|----------|---------------------------------|----------|--|
|                        |      | DP4+            | 100.00%  | 0.00%                      | -        | -                               | -        |  |
| Nuclei                 | sp2? | Experimental    | Isomer 1 | Isomer 2                   | Isomer 3 | Isomer 4                        | Isomer 5 |  |
| C                      | x    | 198.9           | 207.7    | 207.6                      |          |                                 |          |  |
| C                      | x    | 181.3           | 188.5    | 188.8                      |          |                                 |          |  |
| C                      | x    | 177             | 187.4    | 188.0                      |          |                                 |          |  |
| C                      | x    | 155.5           | 163.6    | 163.8                      |          |                                 |          |  |
| C                      | x    | 144.8           | 155.8    | 155.8                      |          |                                 |          |  |
| C                      | x    | 141.6           | 152.2    | 150.7                      |          |                                 |          |  |
| C                      | x    | 132.4           | 143.8    | 142.6                      |          |                                 |          |  |
| C                      | x    | 128.3           | 138.5    | 139.5                      |          |                                 |          |  |
| C                      | x    | 127.9           | 133.1    | 134.0                      |          |                                 |          |  |
| C                      | x    | 125.9           | 132.9    | 133.2                      |          |                                 |          |  |
| C                      | x    | 112.6           | 118.4    | 118.4                      |          |                                 |          |  |
| C                      |      | 64.4            | 69.80    | 68.90                      |          |                                 |          |  |
| C                      |      | 63.5            | 68.50    | 68.00                      |          |                                 |          |  |
| C                      |      | 50.7            | 58.40    | 58.40                      |          |                                 |          |  |
| C                      |      | 49.7            | 55.04    | 55.90                      |          |                                 |          |  |
| C                      |      | 48.7            | 52.29    | 51.72                      |          |                                 |          |  |
| C                      |      | 46.2            | 52.15    | 51.35                      |          |                                 |          |  |
| C                      |      | 45.7            | 50.57    | 51.28                      |          |                                 |          |  |
| C                      |      | 43.9            | 47.63    | 45.71                      |          |                                 |          |  |
| C                      |      | 37.5            | 42.07    | 41.67                      |          |                                 |          |  |
| C                      |      | 37              | 40.52    | 41.38                      |          |                                 |          |  |
| C                      |      | 36              | 39.79    | 39.99                      |          |                                 |          |  |
| C                      |      | 35              | 38.22    | 34.14                      |          |                                 |          |  |
| C                      |      | 29.5            | 34.51    | 31.39                      |          |                                 |          |  |
| C                      |      | 28.1            | 30.88    | 37.32                      |          |                                 |          |  |
| C                      |      | 26.4            | 29.6     | 31.2                       |          |                                 |          |  |
| C                      |      | 25.6            | 29.5     | 31                         |          |                                 |          |  |
| C                      |      | 25.1            | 29       | 28.9                       |          |                                 |          |  |
| C                      |      | 24.2            | 28.5     | 28.7                       |          |                                 |          |  |
| C                      |      | 21.1            | 23.5     | 23.9                       |          |                                 |          |  |
| C                      |      | 19.8            | 22.3     | 21.7                       |          |                                 |          |  |
| C                      |      | 19.2            | 21.6     | 20.4                       |          |                                 |          |  |
| C                      |      | 17.7            | 20.9     | 20.2                       |          |                                 |          |  |
| C                      |      | 16.7            | 18.3     | 18.8                       |          |                                 |          |  |
| C                      |      | 12.4            | 13.3     | 14.2                       |          |                                 |          |  |
| H                      | x    | 6.83            | 6.04     | 6.04                       |          |                                 |          |  |
| H                      | x    | 4.79            | 5.38     | 5.2                        |          |                                 |          |  |
| H                      |      | 3.24            | 3.36     | 3.18                       |          |                                 |          |  |
| H                      |      | 3.15            | 3.16     | 3.09                       |          |                                 |          |  |
| H                      |      | 2.74            | 3.1      | 3.06                       |          |                                 |          |  |
| H                      |      | 2.63            | 2.94     | 2.99                       |          |                                 |          |  |
| H                      |      | 2.63            | 2.73     | 2.96                       |          |                                 |          |  |
| H                      |      | 2.63            | 2.54     | 2.51                       |          |                                 |          |  |
| H                      |      | 2.58            | 2.54     | 2.8                        |          |                                 |          |  |
| H                      |      | 2.53            | 2.43     | 1.65                       |          |                                 |          |  |
| H                      |      | 2.51            | 2.32     | 1.57                       |          |                                 |          |  |
| H                      |      | 2.34            | 2.19     | 2.43                       |          |                                 |          |  |
| H                      |      | 2.3             | 2.17     | 2.4                        |          |                                 |          |  |
| H                      |      | 2.13            | 2.15     | 2.4                        |          |                                 |          |  |
| H                      |      | 2.01            | 1.94     | 2.26                       |          |                                 |          |  |
| H                      |      | 1.8             | 1.88     | 2.09                       |          |                                 |          |  |
| H                      |      | 1.77            | 1.86     | 2                          |          |                                 |          |  |
| H                      |      | 1.74            | 1.75     | 1.89                       |          |                                 |          |  |
| H                      |      | 1.73            | 1.73     | 1.75                       |          |                                 |          |  |
| H                      |      | 1.69            | 1.71     | 1.71                       |          |                                 |          |  |
| H                      |      | 1.62            | 1.65     | 1.53                       |          |                                 |          |  |
| H                      |      | 1.62            | 1.63     | 1.65                       |          |                                 |          |  |
| H                      |      | 1.59            | 1.59     | 1.64                       |          |                                 |          |  |
| H                      |      | 1.55            | 1.53     | 1.5                        |          |                                 |          |  |
| H                      |      | 1.55            | 1.5      | 1.7                        |          |                                 |          |  |
| H                      |      | 1.54            | 1.47     | 1.63                       |          |                                 |          |  |
| H                      |      | 1.51            | 1.47     | 1.6                        |          |                                 |          |  |
| H                      |      | 1.47            | 1.46     | 1.51                       |          |                                 |          |  |
| H                      |      | 1.47            | 1.37     | 1.46                       |          |                                 |          |  |
| H                      |      | 1.47            | 1.26     | 1.3                        |          |                                 |          |  |
| H                      |      | 1.2             | 1.22     | 1.17                       |          |                                 |          |  |
| H                      |      | 1.15            | 1.18     | 1.11                       |          |                                 |          |  |
| H                      |      | 1.15            | 1.17     | 1.11                       |          |                                 |          |  |
| H                      |      | 1.15            | 1.09     | 1.07                       |          |                                 |          |  |
| H                      |      | 1.13            | 1.01     | 1.06                       |          |                                 |          |  |
| H                      |      | 1.13            | 1.03     | 1.05                       |          |                                 |          |  |
| H                      |      | 1.13            | 0.97     | 1.03                       |          |                                 |          |  |
| H                      |      | 1.01            | 0.96     | 0.98                       |          |                                 |          |  |
| H                      |      | 0.73            | 0.87     | 0.91                       |          |                                 |          |  |
| H                      |      | 0.73            | 0.85     | 0.82                       |          |                                 |          |  |
| H                      |      | 0.73            | 0.5      | 0.46                       |          |                                 |          |  |



| Functional       | Solvent? |          | Basis Set    |          |          |          | Type of Data    |
|------------------|----------|----------|--------------|----------|----------|----------|-----------------|
| mPW1PW91         | PCM      |          | 6-311+G(d,p) |          |          |          | Unscaled Shifts |
|                  | Isomer 1 | Isomer 2 | Isomer 3     | Isomer 4 | Isomer 5 | Isomer 6 |                 |
| sDP4+ (H data)   | 100.00%  | 0.00%    | -            | -        | -        | -        |                 |
| sDP4+ (C data)   | 99.99%   | 0.01%    | -            | -        | -        | -        |                 |
| sDP4+ (all data) | 100.00%  | 0.00%    | -            | -        | -        | -        |                 |
| uDP4+ (H data)   | 100.00%  | 0.00%    | -            | -        | -        | -        |                 |
| uDP4+ (C data)   | 99.97%   | 0.03%    | -            | -        | -        | -        |                 |
| uDP4+ (all data) | 100.00%  | 0.00%    | -            | -        | -        | -        |                 |
| DP4+ (H data)    | 100.00%  | 0.00%    | -            | -        | -        | -        |                 |
| DP4+ (C data)    | 100.00%  | 0.00%    | -            | -        | -        | -        |                 |
| DP4+ (all data)  | 100.00%  | 0.00%    | -            | -        | -        | -        |                 |

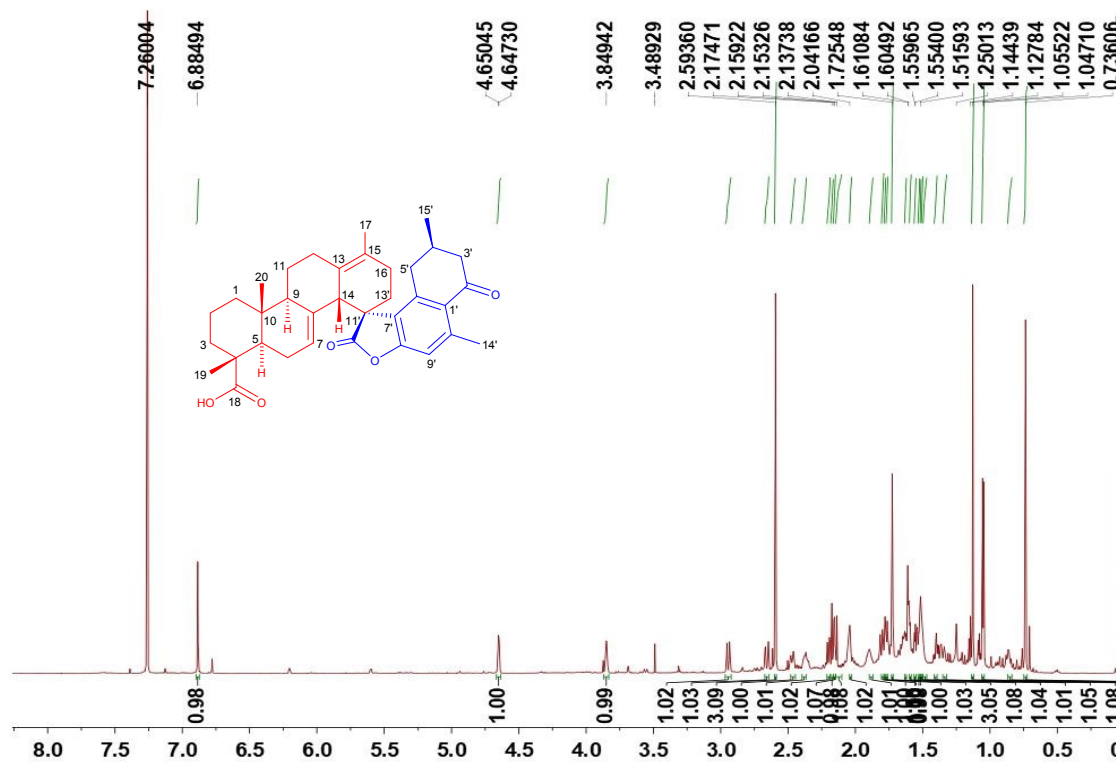

Figure S10. <sup>1</sup>H NMR (800 MHz) spectrum of compound 1 in CDCl<sub>3</sub>.

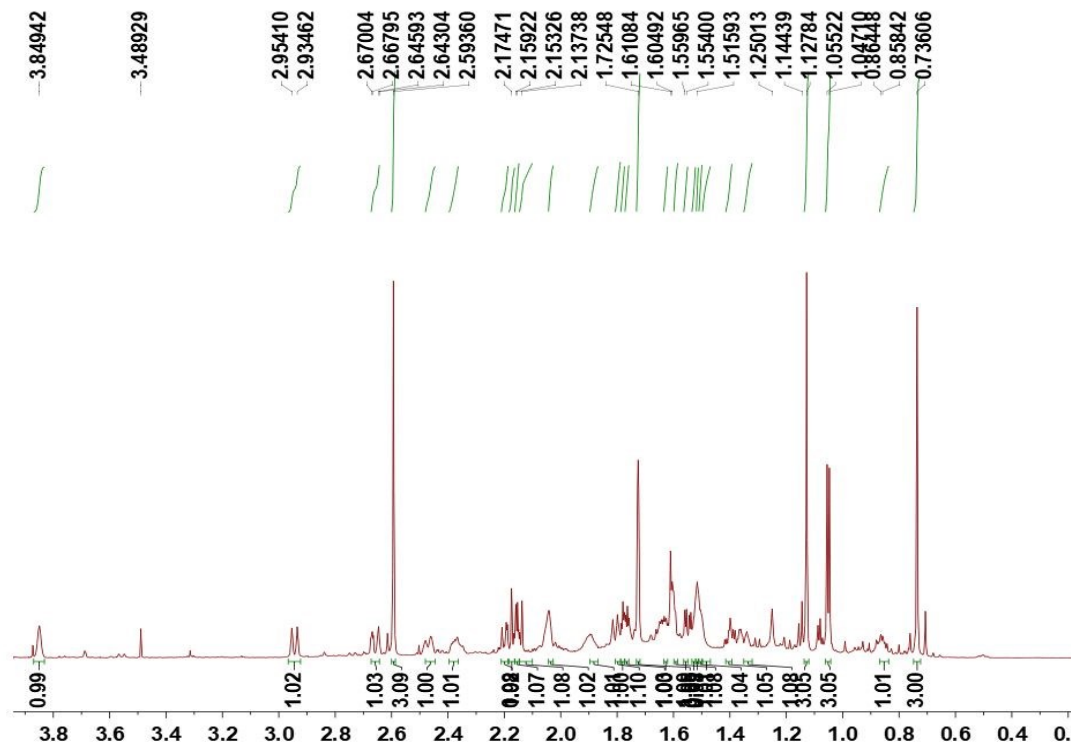

Figure S11. The part of  $^1\text{H}$  NMR (800 MHz) spectrum of compound **1** in  $\text{CDCl}_3$

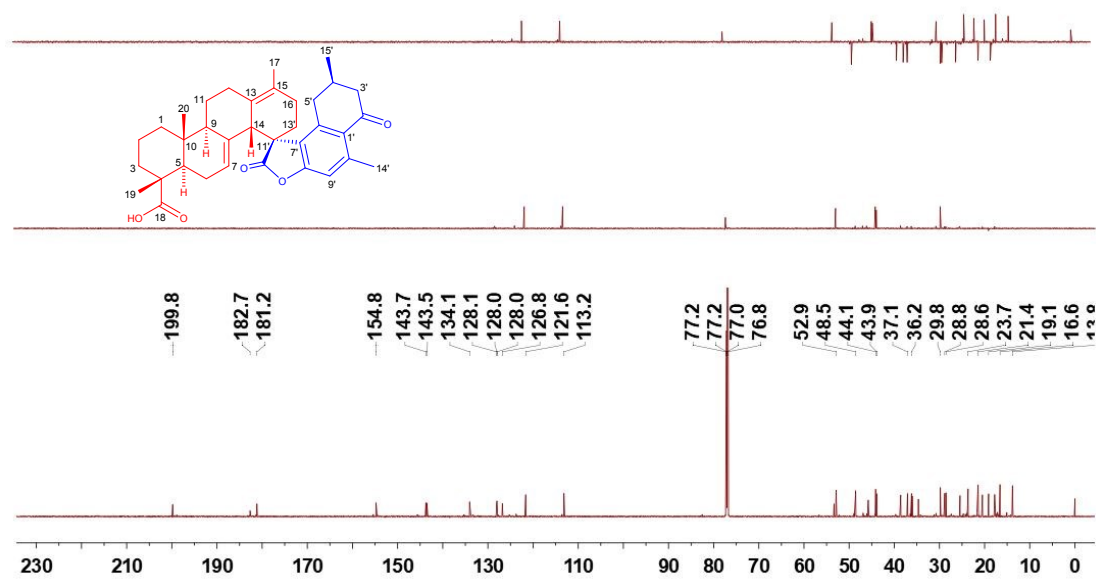

Figure S12.  $^{13}\text{C}$  NMR (200 MHz) and DEPT spectra of compound **1** in  $\text{CDCl}_3$ .

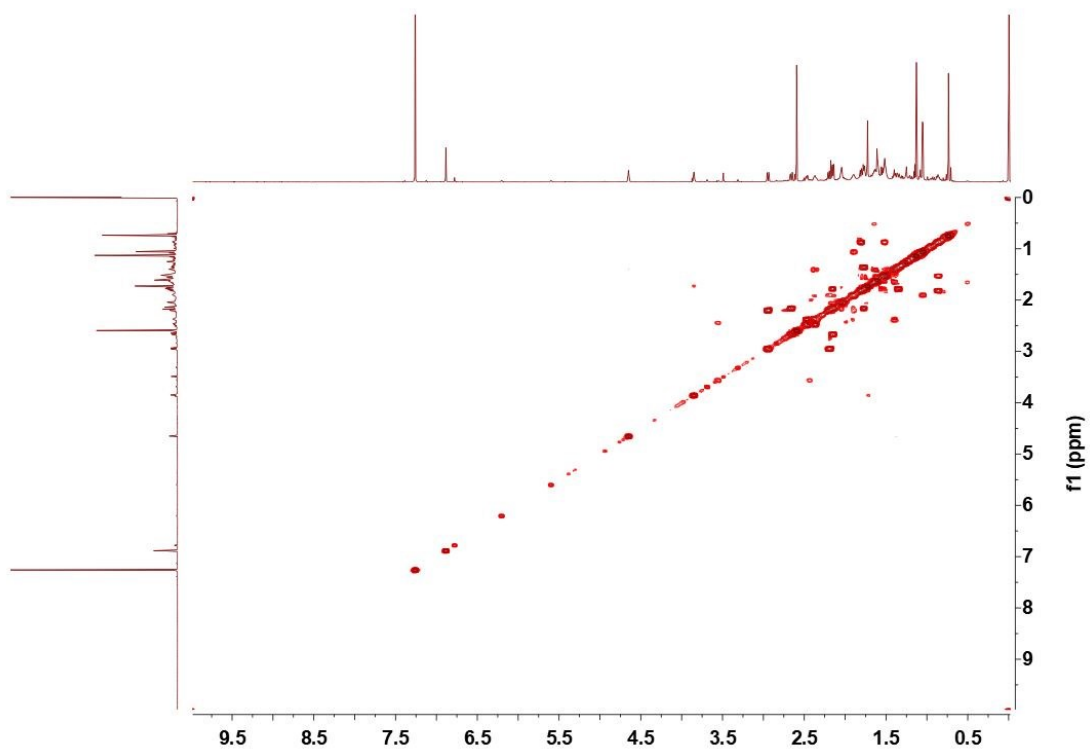

Figure S13.  $^1\text{H}$ - $^1\text{H}$  COSY spectrum of compound **1** in  $\text{CDCl}_3$ .

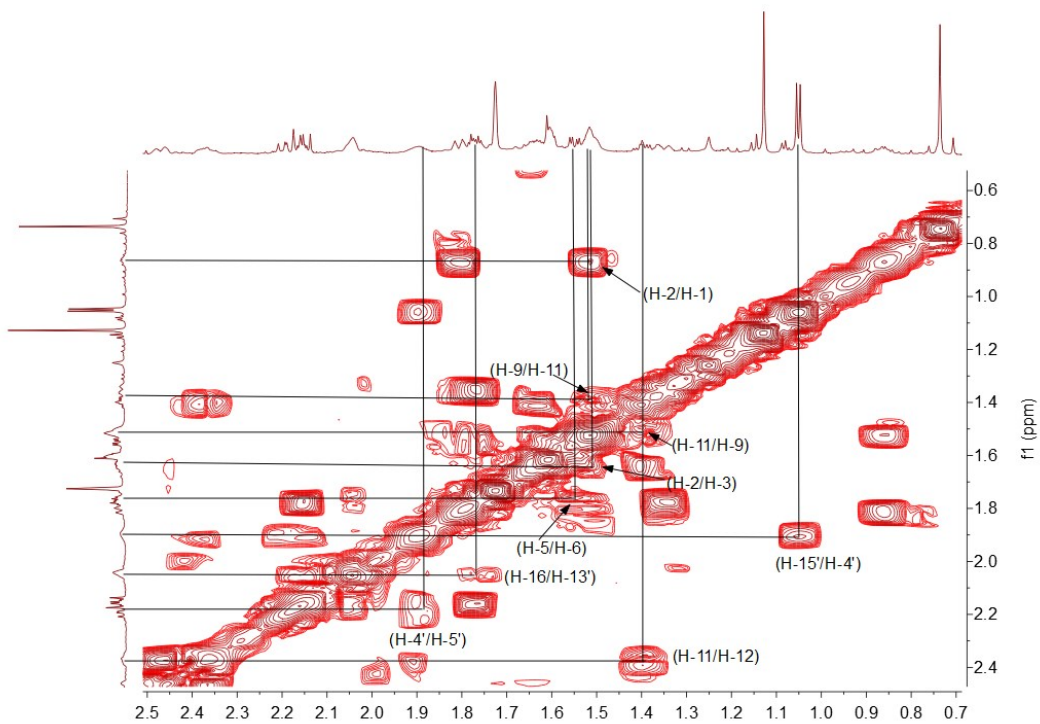

Figure S14. The part of  $^1\text{H}$ - $^1\text{H}$  COSY spectrum of compound **1** in  $\text{CDCl}_3$  (**1**).

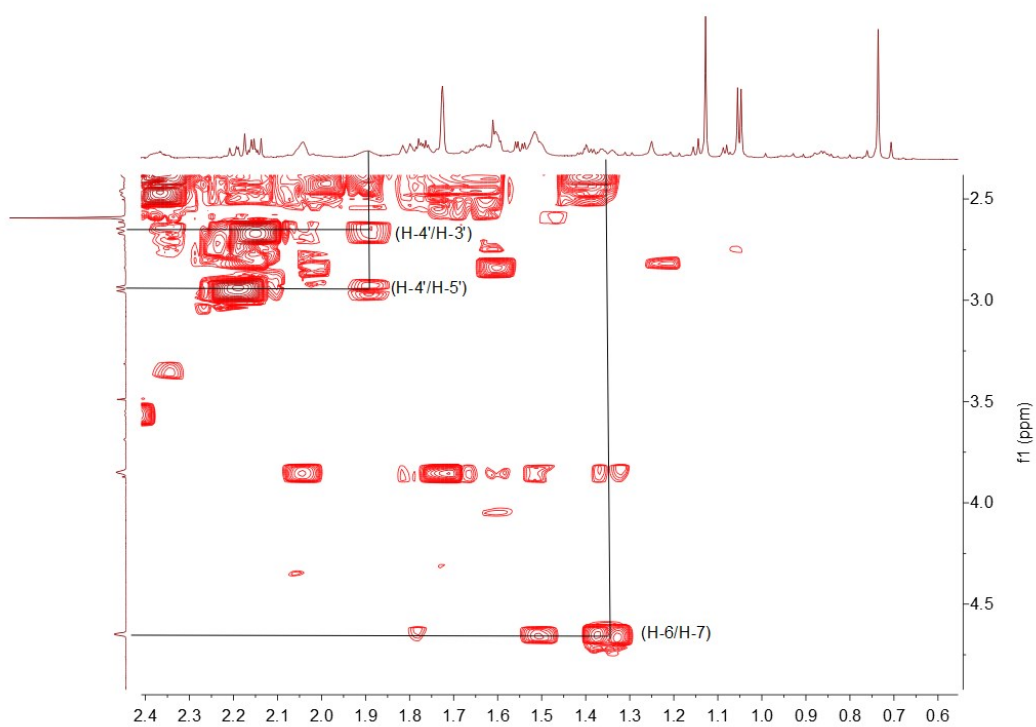

Figure S15. The part of  $^1\text{H}$ - $^1\text{H}$  COSY spectrum of compound **1** in  $\text{CDCl}_3$  (2).

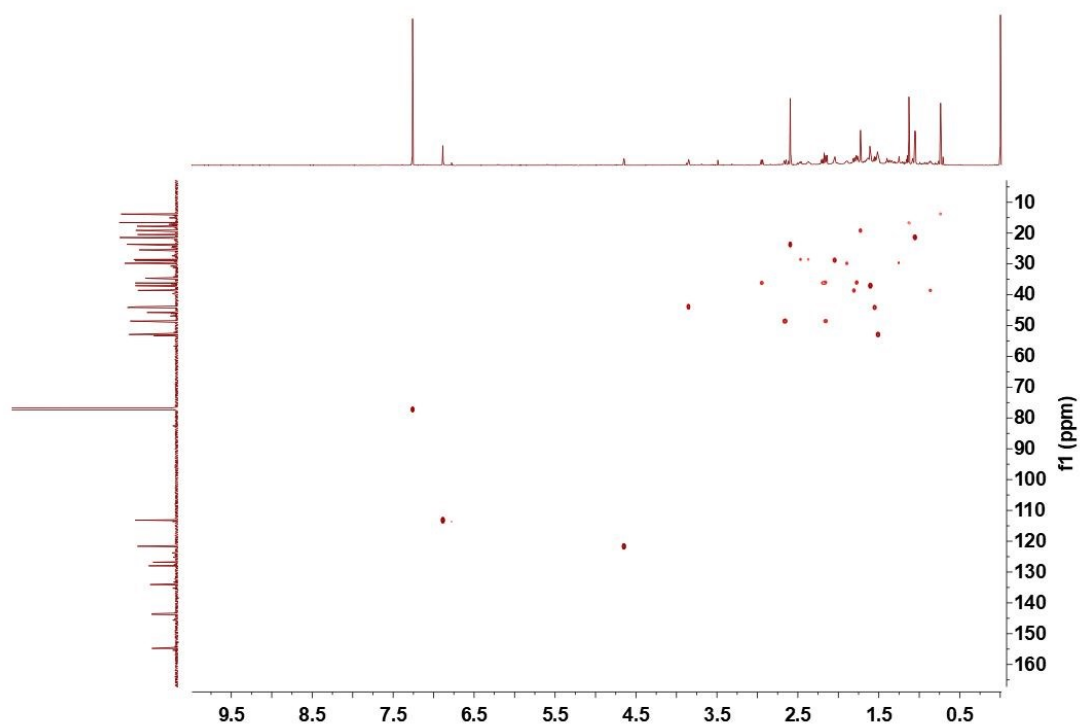

Figure S16. HSQC spectrum of compound **1** in  $\text{CDCl}_3$ .

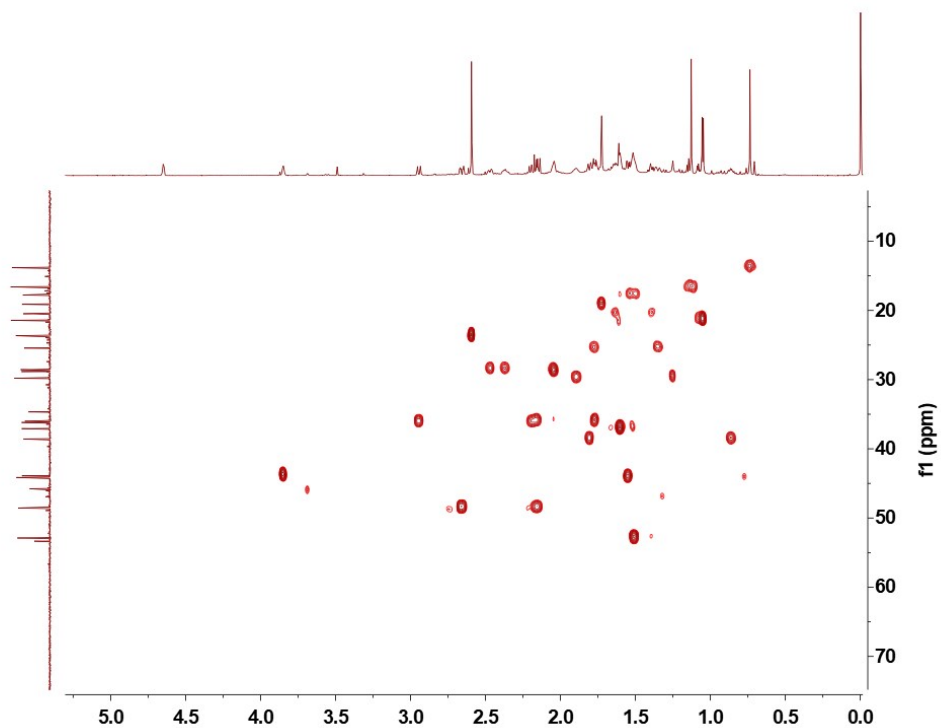

Figure S17. The part of HSQC spectrum of compound **1** in  $\text{CDCl}_3$ .

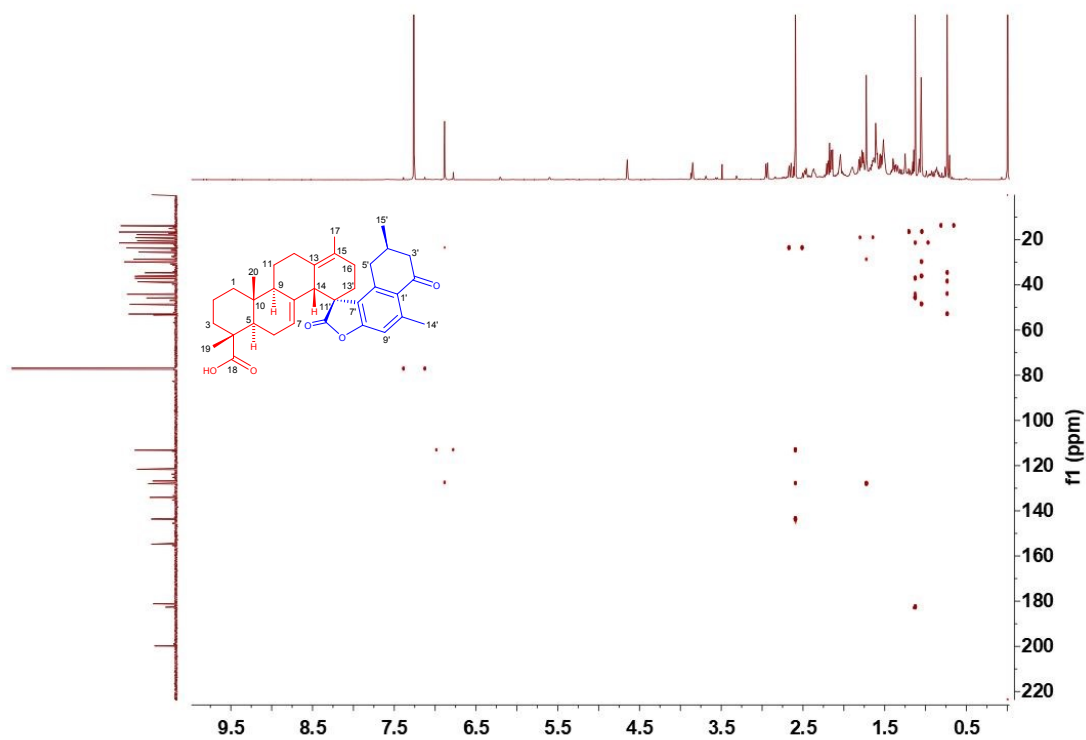

Figure S18. HMBC spectrum of compound **1** in  $\text{CDCl}_3$ .

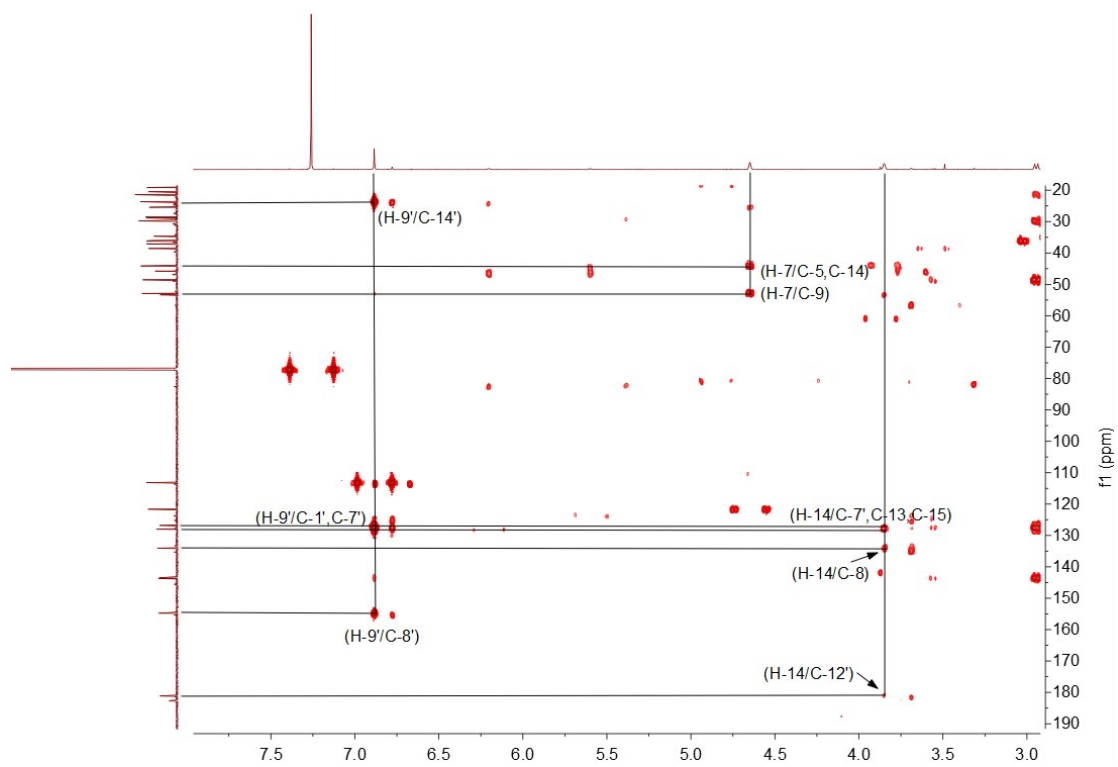

Figure S19. The part of HMBC spectrum of compound **1** in CDCl<sub>3</sub> (1).

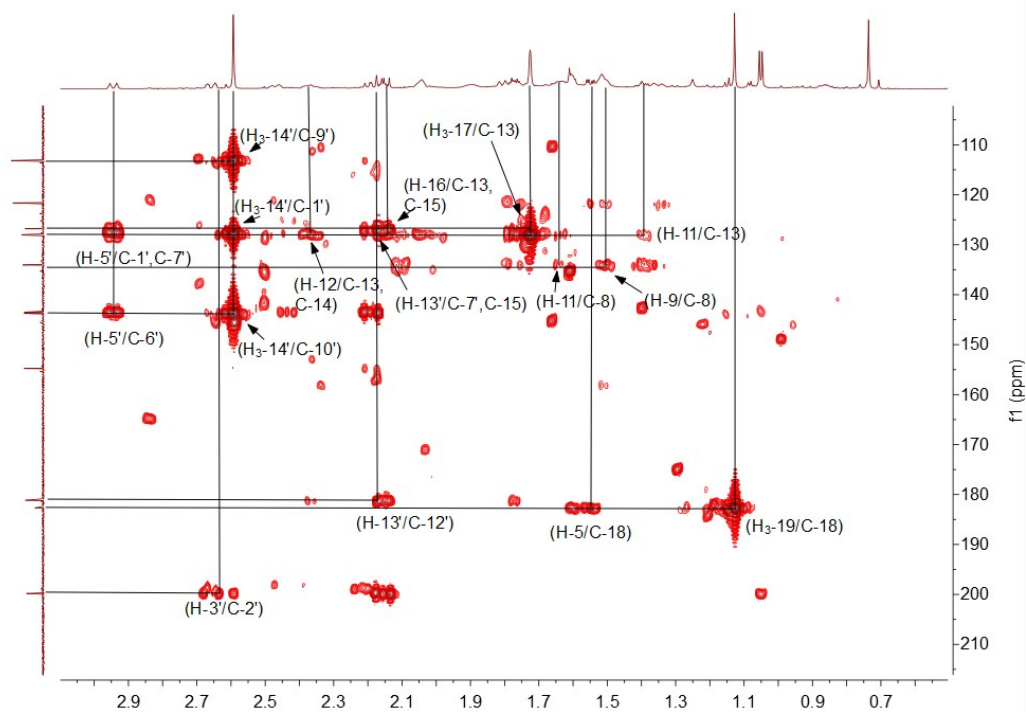

Figure S20. The part of HMBC spectrum of compound **1** in CDCl<sub>3</sub> (2).

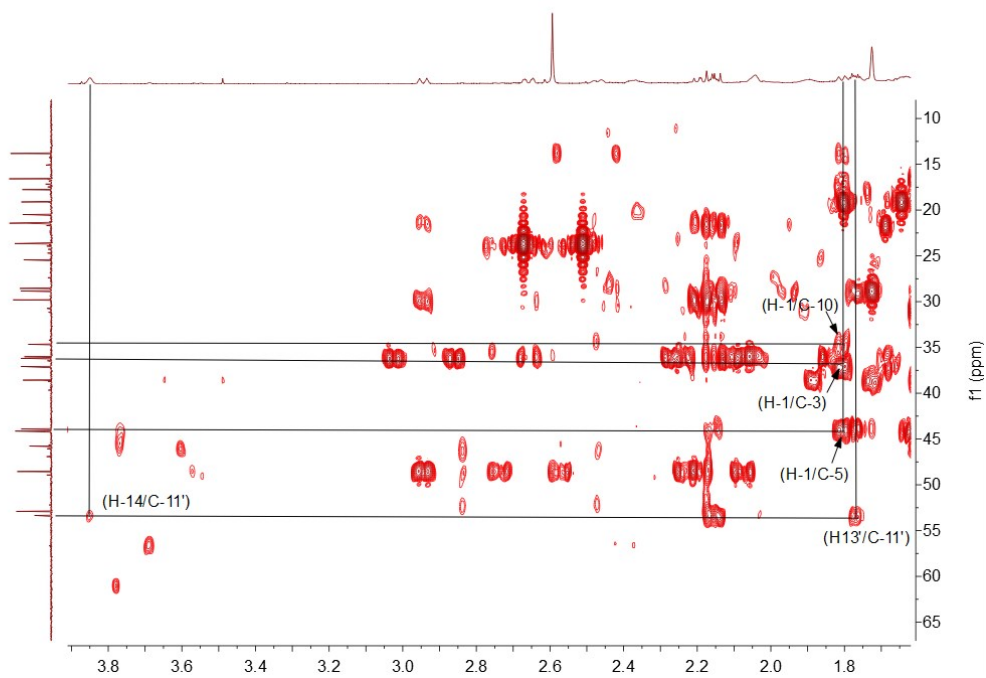

Figure S21. The part of HMBC spectrum of compound **1** in  $\text{CDCl}_3$  (2).

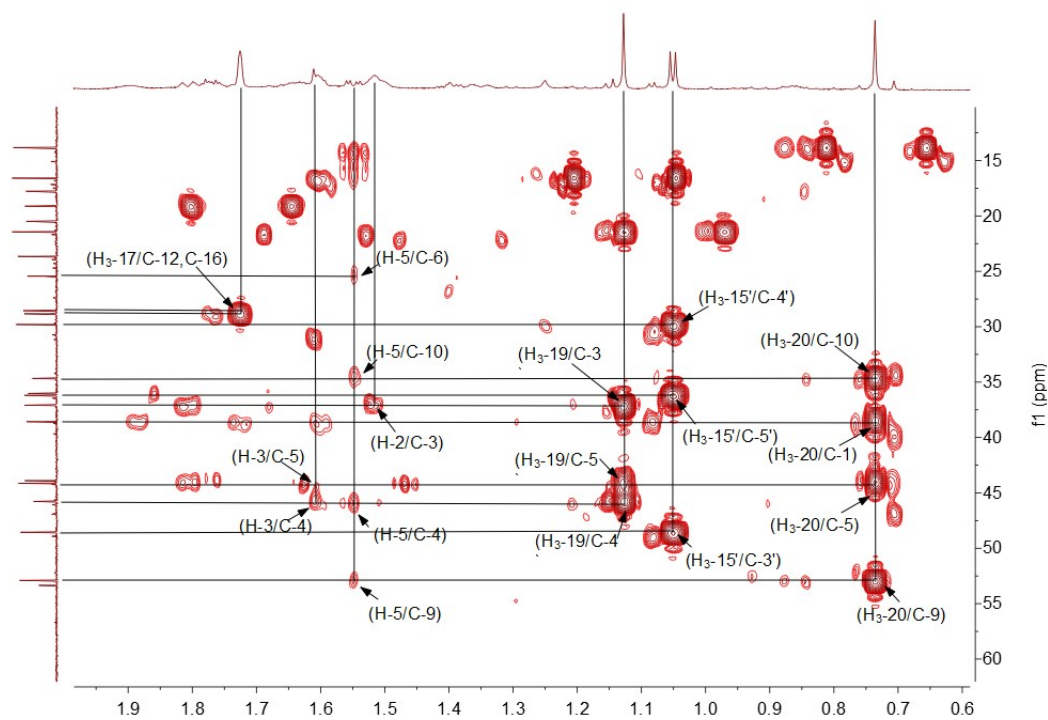

Figure S22. The part of HMBC spectrum of compound **1** in  $\text{CDCl}_3$  (3).



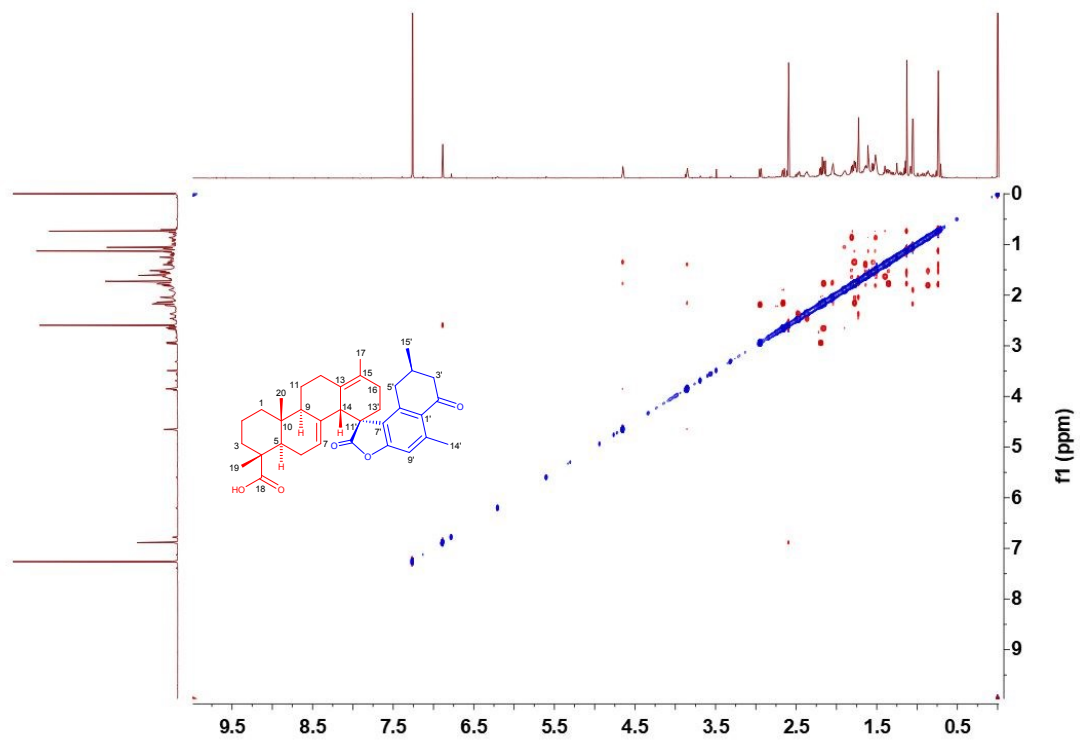

Figure S23. ROESY spectrum of compound **1** in  $\text{CDCl}_3$ .

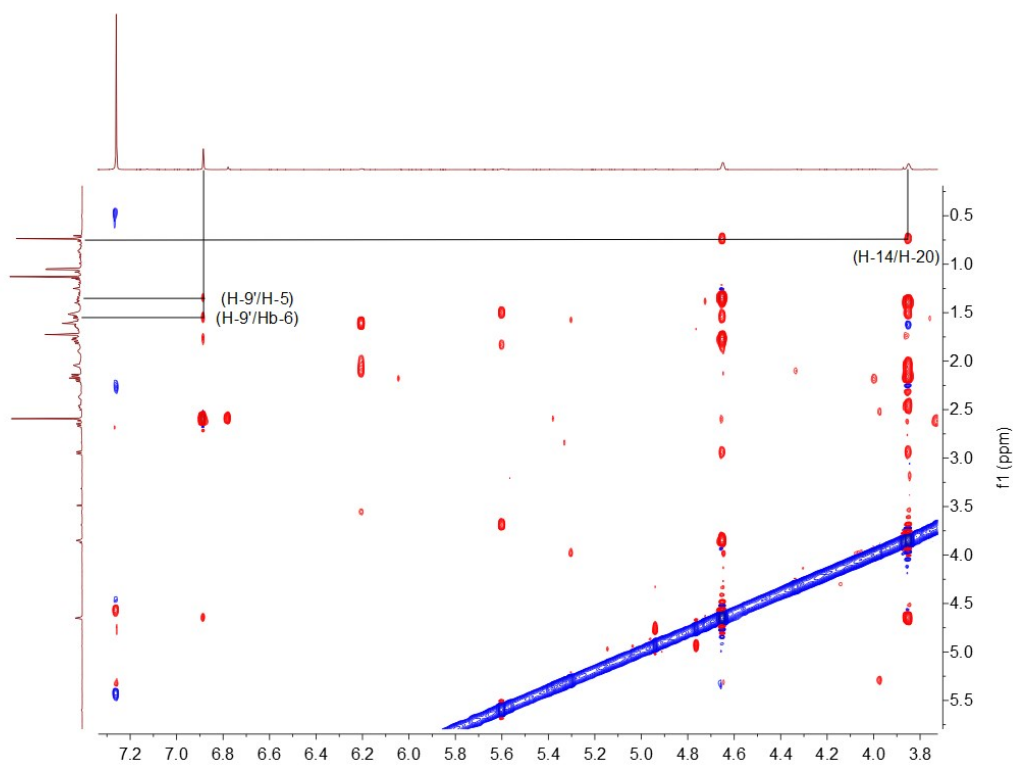

Figure S24. The part of ROESY spectrum of compound **1** in  $\text{CDCl}_3$  (1).



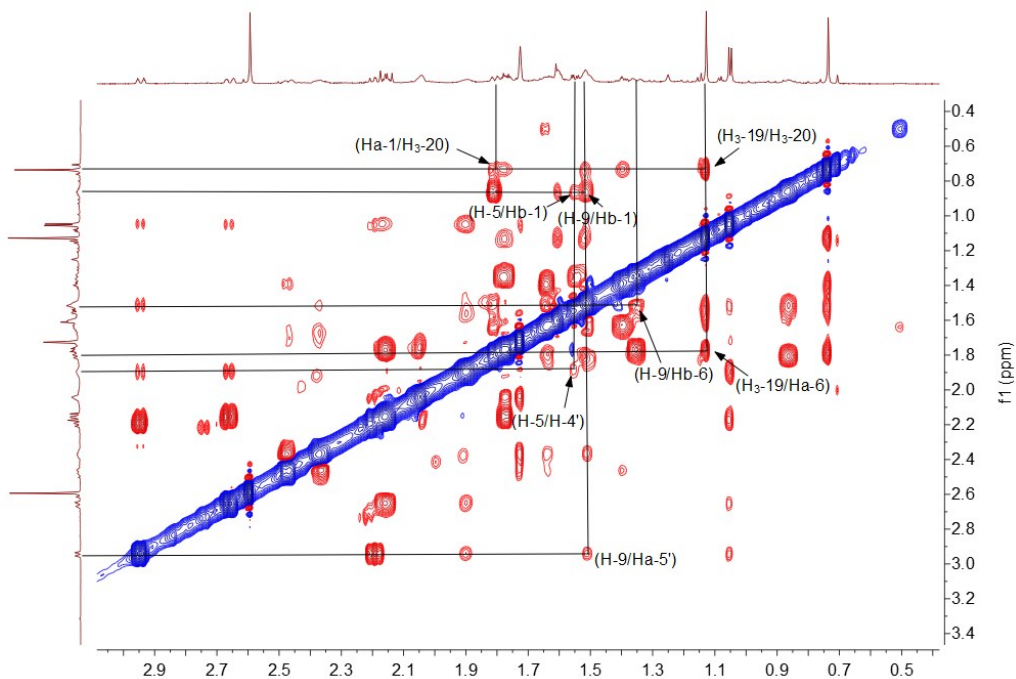

Figure S25. The part of ROESY spectrum of compound **1** in  $\text{CDCl}_3$  (2).

Elemental Composition Report

Page 1

Single Mass Analysis

Tolerance = 10.0 PPM / DBE: min = -10.0, max = 120.0

Selected filters: None

Monoisotopic Mass, Odd and Even Electron Ions  
23 formula(e) evaluated with 1 results within limits (up to 51 closest results for each mass)

Elements Used:  
C: 0-200 H: 0-400 O: 4-6

qjw-62b  
03:26:29 20-Sep-2017  
Voltage EI+

KIB  
M170919EA-02AFAMM 29 (2.662)  
542.3028

Autospec Premier  
F776  
10

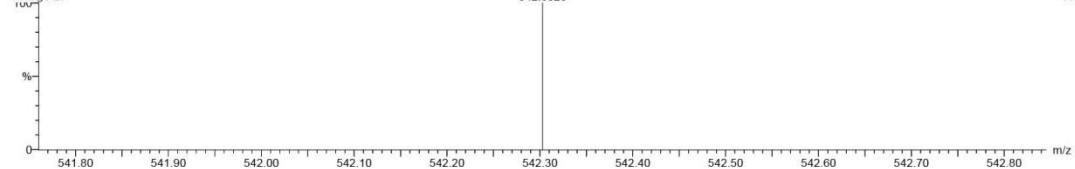

| Mass     | Calc. Mass | mDa  | PPM  | DBE  | i-FIT     | Formula    |
|----------|------------|------|------|------|-----------|------------|
| 542.3028 | 542.3032   | -0.4 | -0.7 | 15.0 | 5546027.0 | C35 H42 O5 |

Figure S26. HRESIMS of compound **1**.

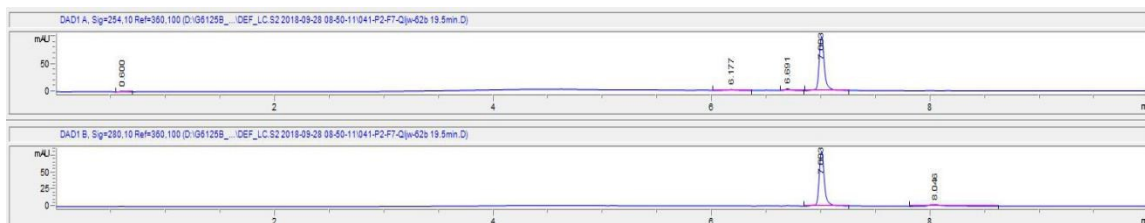

Figure S27. HPLC chromatogram of compound **1**.

(Mobile phase: aqueous MeCN, 10%-100% within 10 min, flow rate 0.25 mL/min)

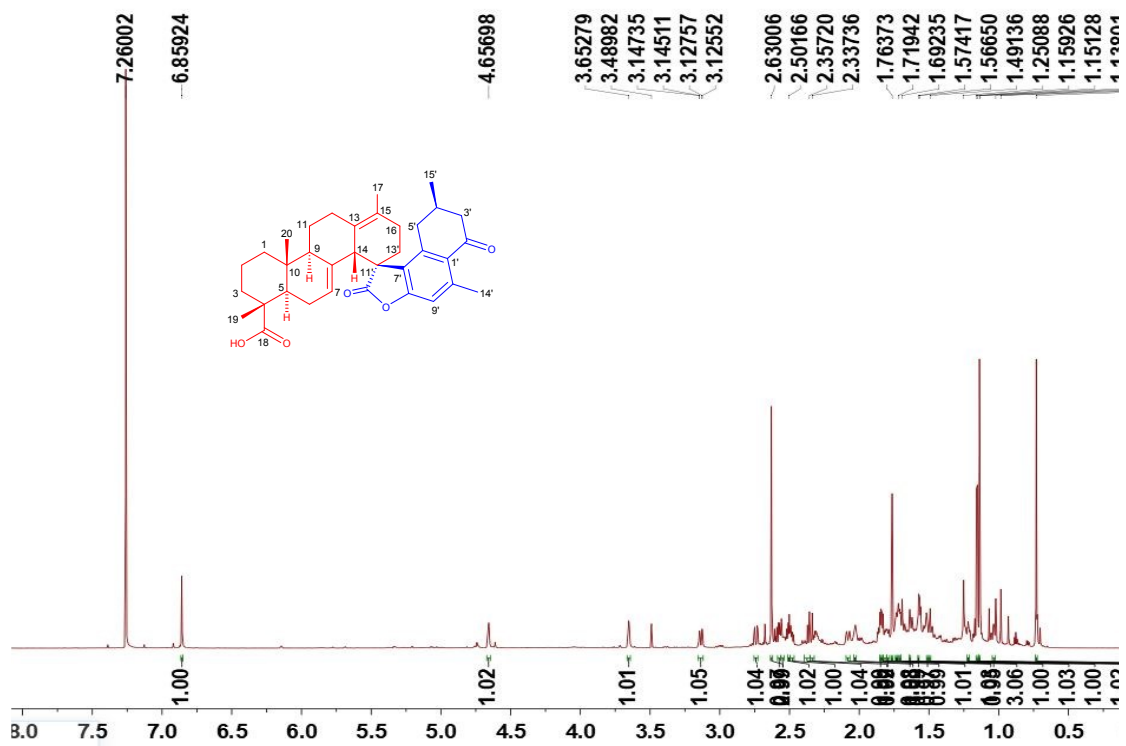

Figure S28. <sup>1</sup>H NMR (800 MHz) spectrum of compound 2 in CDCl<sub>3</sub>.

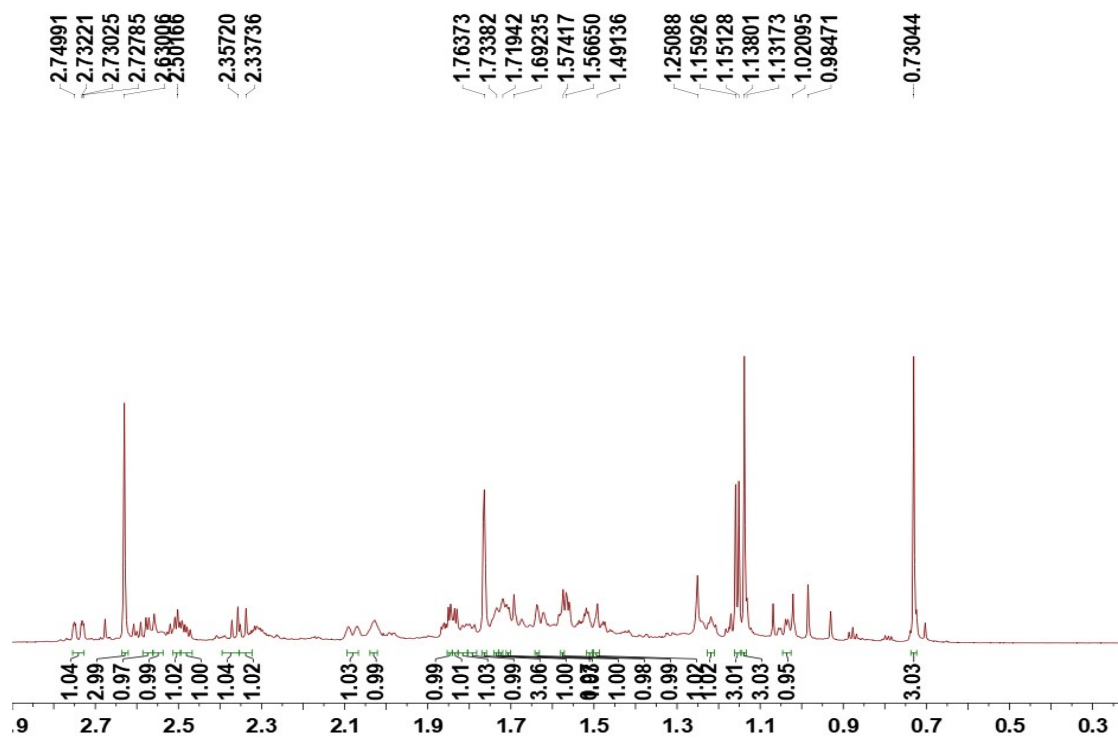

Figure S29. The part of <sup>1</sup>H NMR (800 MHz) spectrum of compound 2 in CDCl<sub>3</sub>.

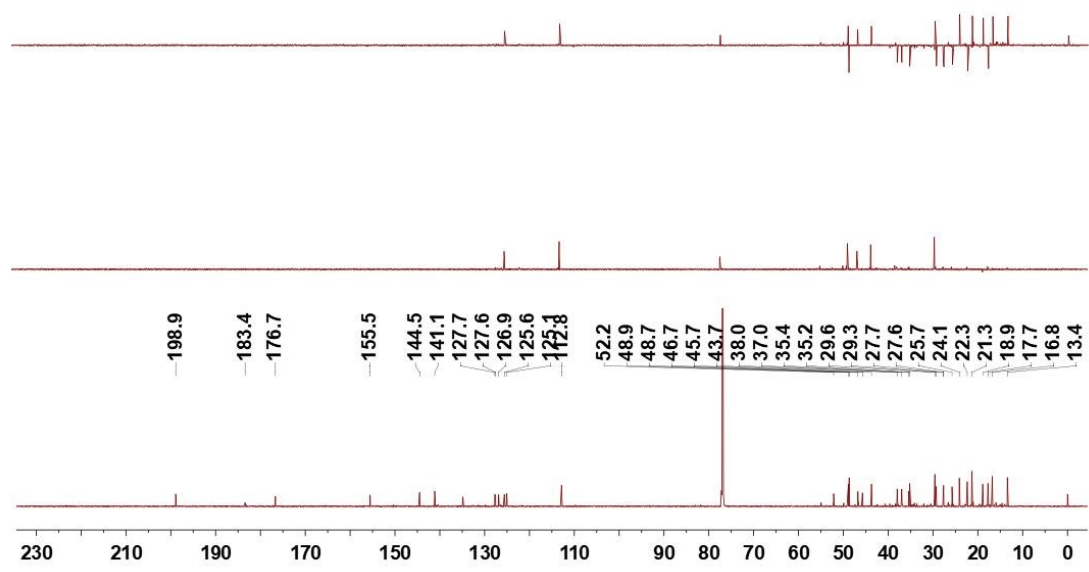

Figure S30.  $^{13}\text{C}$  NMR (200 MHz) and DEPT spectra of compound **2** in  $\text{CDCl}_3$ .

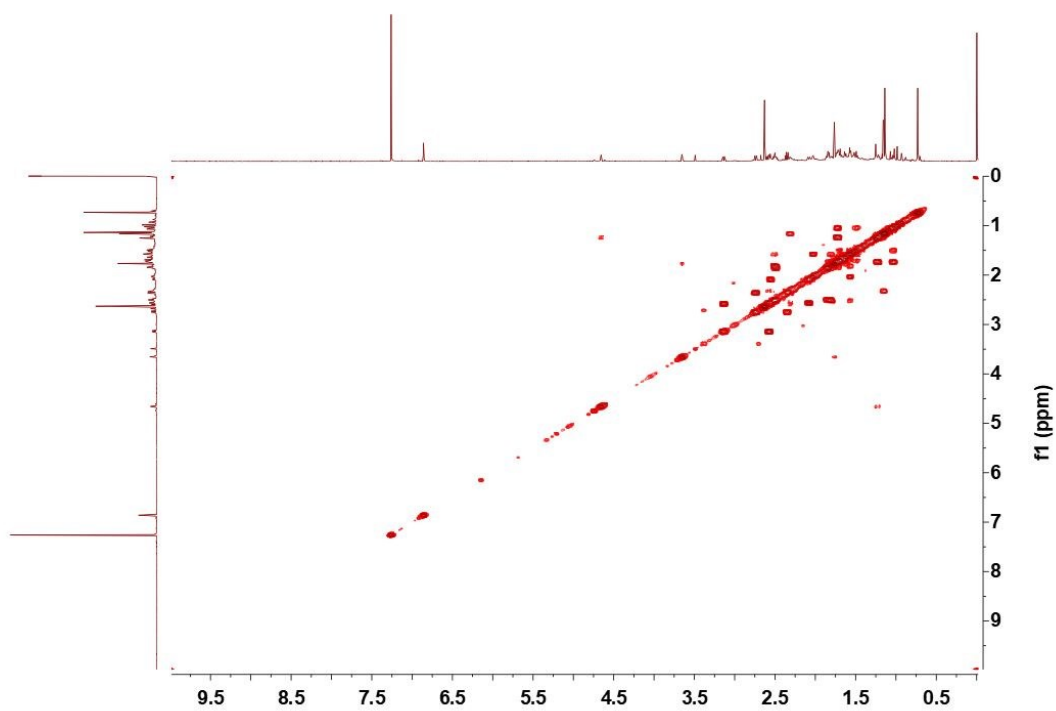

Figure S31.  $^1\text{H}$ - $^1\text{H}$  COSY spectrum of compound **2** in  $\text{CDCl}_3$ .

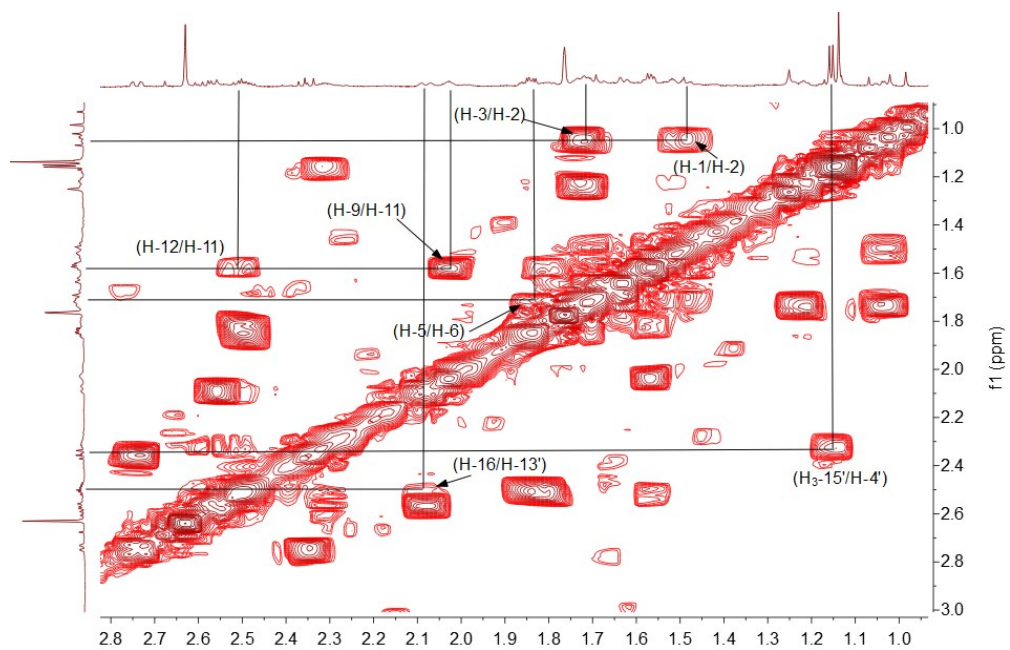

**Figure S32.** The part of  $^1\text{H}$ - $^1\text{H}$  COSY spectrum of compound **2** in  $\text{CDCl}_3$  (1).

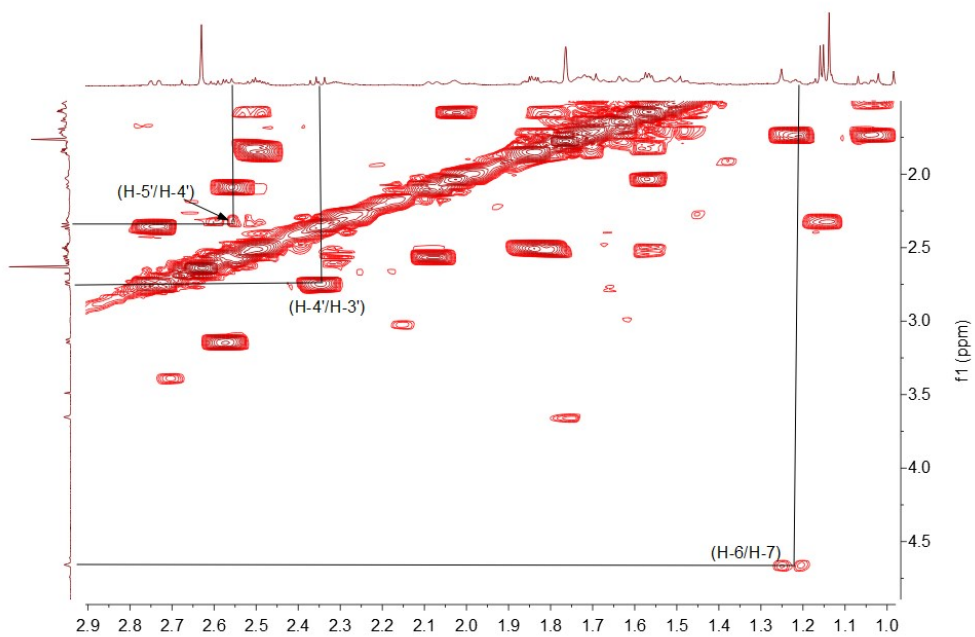

**Figure S33.** The part of  $^1\text{H}$ - $^1\text{H}$  COSY spectrum of compound **2** in  $\text{CDCl}_3$  (2).

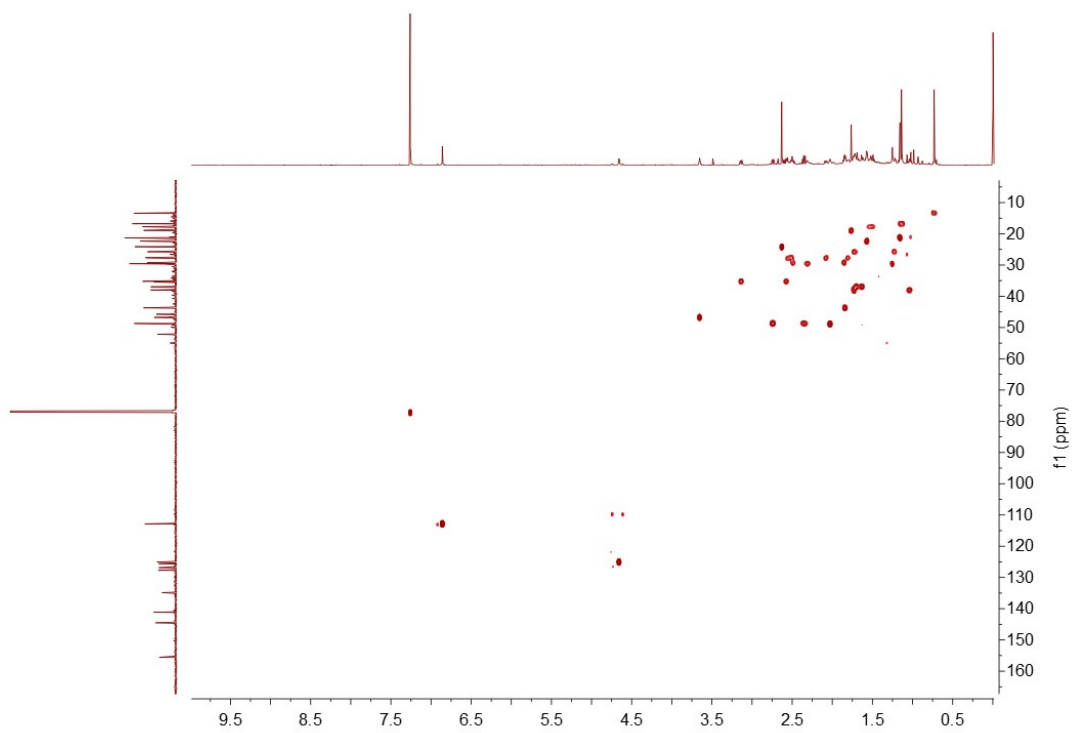

Figure S34. HSQC spectrum of compound **2** in CDCl<sub>3</sub>.

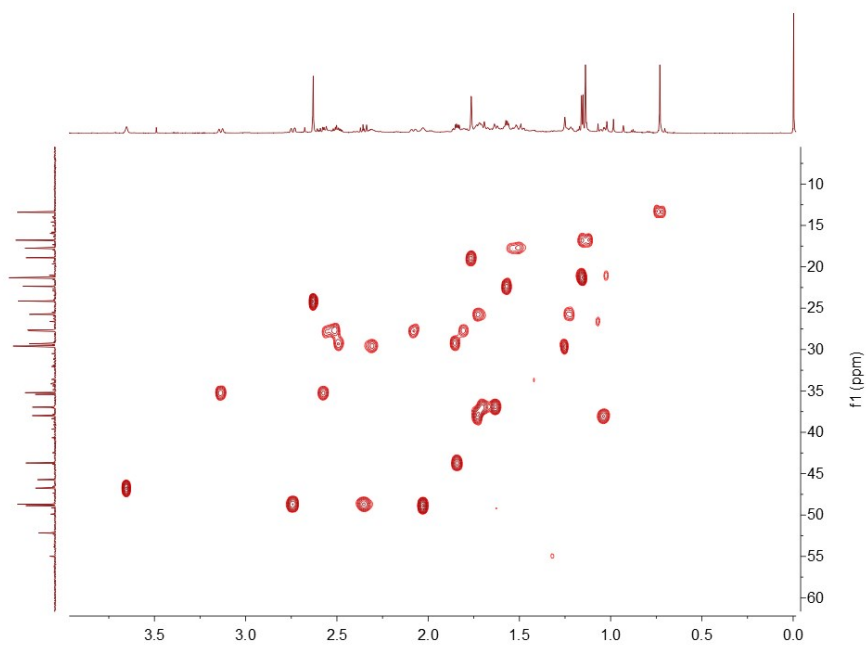

Figure S35. The part of HSQC spectrum of compound **2** in CDCl<sub>3</sub>.

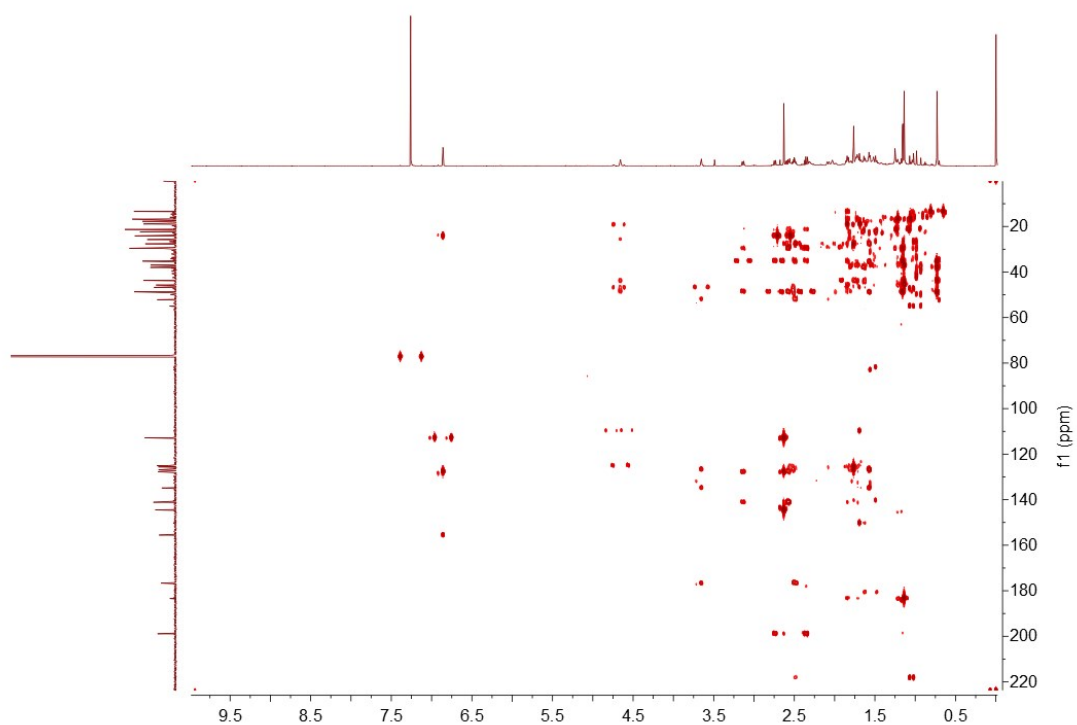

Figure S36. HMBC spectrum of compound **2** in  $\text{CDCl}_3$ .

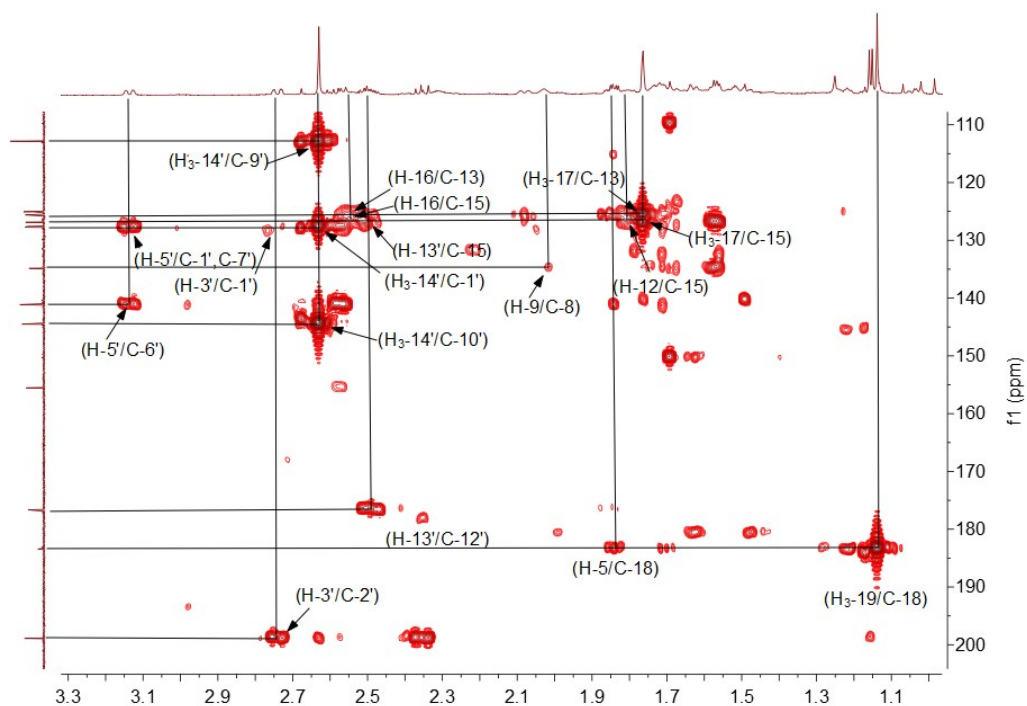

Figure S37. The part of HMBC spectrum of compound **2** in  $\text{CDCl}_3$  (1).

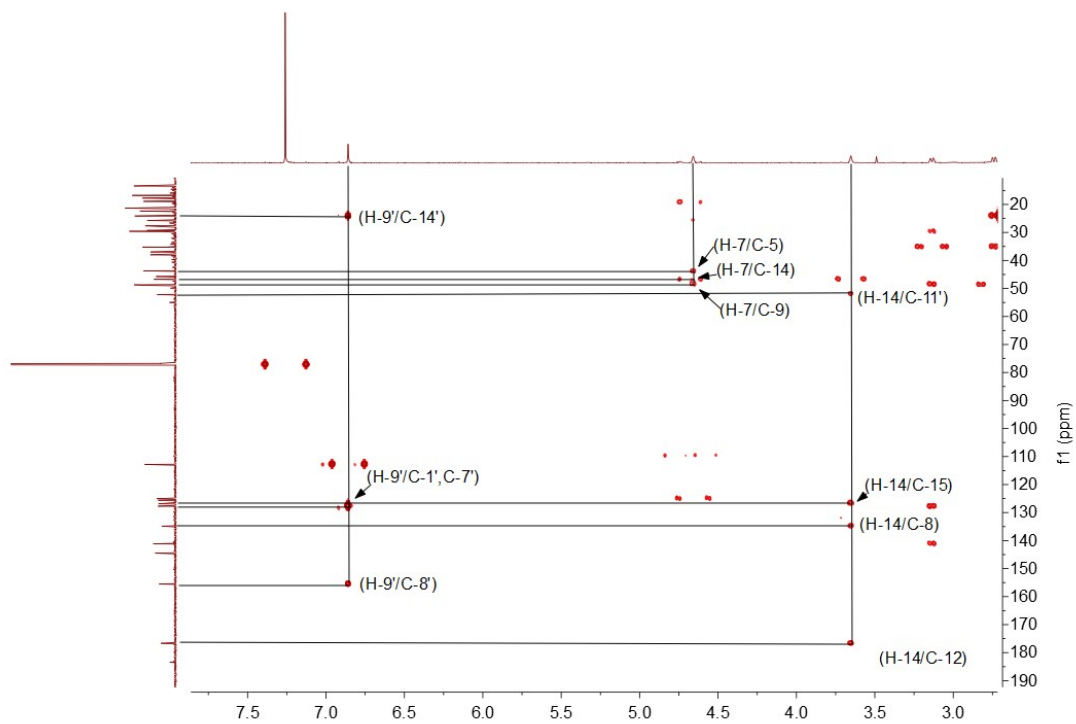

Figure S38. The part of HMBC spectrum of compound 2 in CDCl<sub>3</sub> (2).

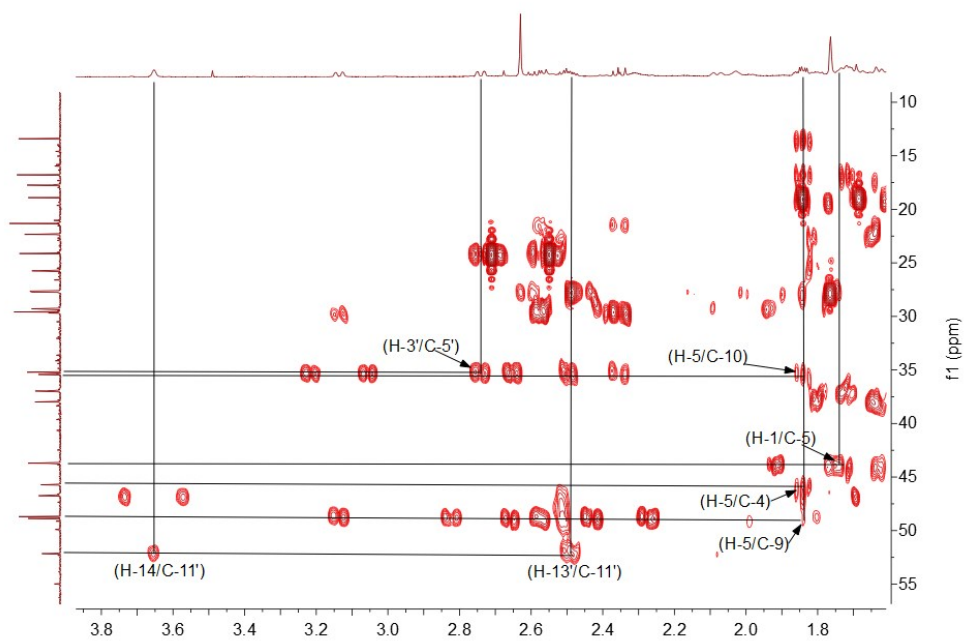

Figure S39. The part of HMBC spectrum of compound 2 in CDCl<sub>3</sub> (3).



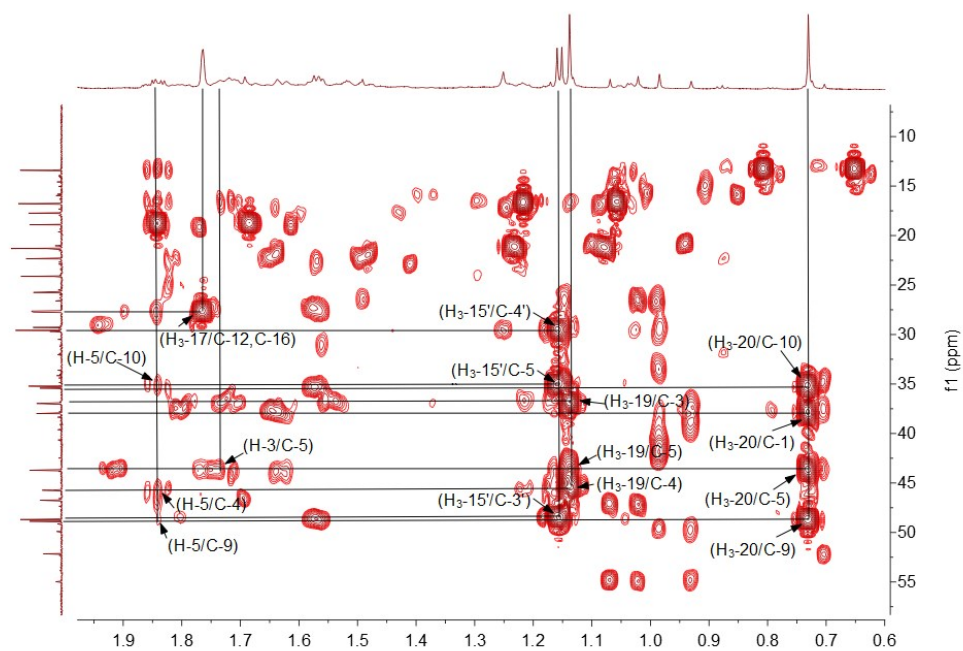

Figure S40. The part of HMBC spectrum of compound **2** in  $\text{CDCl}_3$  (4).

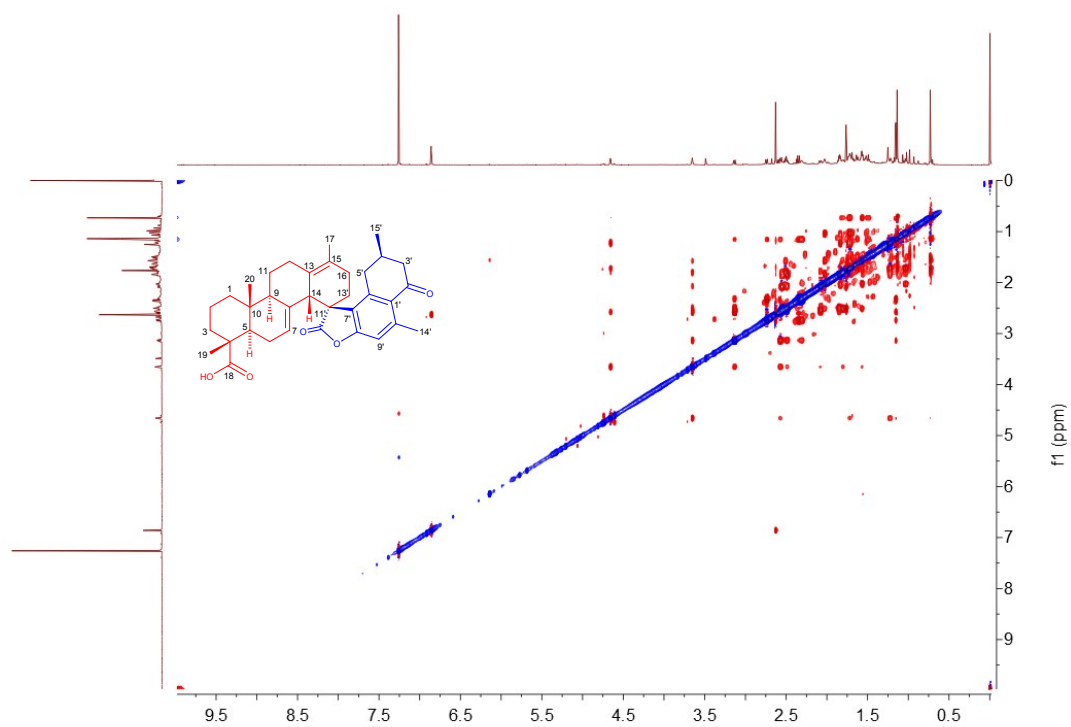

Figure S41. ROESY spectrum of compound **2** in  $\text{CDCl}_3$ .



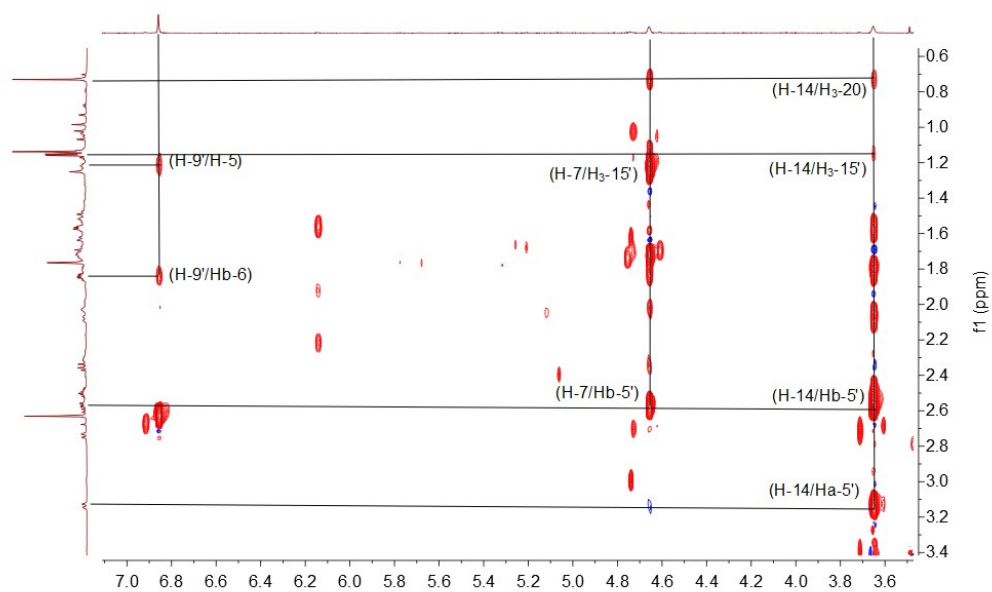

**Figure S42.** The part of ROESY spectrum of compound **2** in CDCl<sub>3</sub> (1).

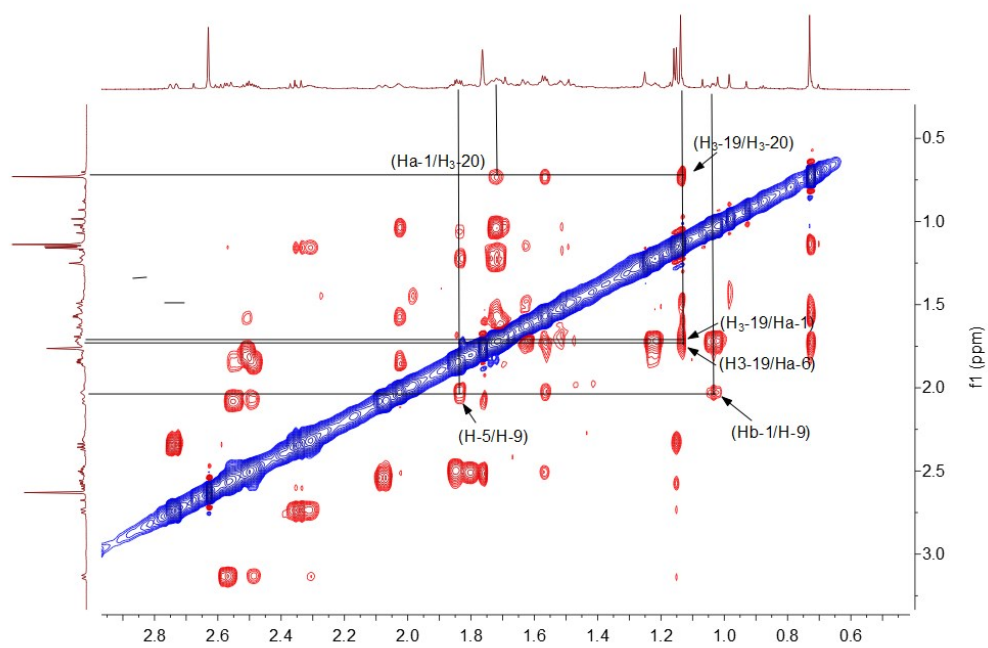

**Figure S43.** The part of ROESY spectrum of compound **2** in CDCl<sub>3</sub> (2).

## Qualitative Analysis Report

|                               |                             |                      |                      |
|-------------------------------|-----------------------------|----------------------|----------------------|
| <b>Data Filename</b>          | 170822ESIA15.d              | <b>Sample Name</b>   | Qljw-62a             |
| <b>Sample Type</b>            | Sample                      | <b>Position</b>      |                      |
| <b>Instrument Name</b>        | Agilent G6230 TOF MS        | <b>User Name</b>     | KIB                  |
| <b>Acq Method</b>             | ESI.m                       | <b>Acquired Time</b> | 8/22/2017 2:56:29 PM |
| <b>IRM Calibration Status</b> | Success                     | <b>DA Method</b>     | ESI.m                |
| <b>Comment</b>                |                             |                      |                      |
| <b>Sample Group</b>           |                             | <b>Info.</b>         |                      |
| <b>Acquisition SW</b>         | 6200 series TOF/6500 series |                      |                      |
| <b>Version</b>                | Q-TOF B.05.01 (B5125.2)     |                      |                      |

### User Spectra

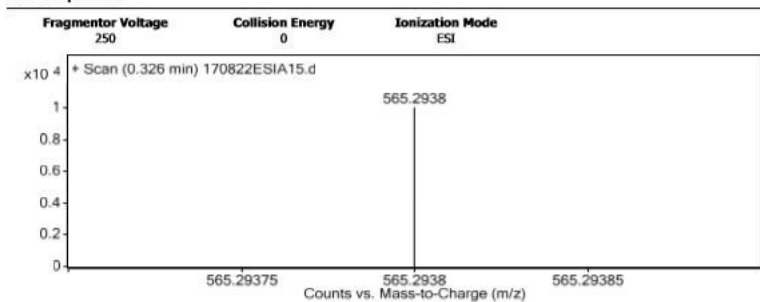

### Peak List

| <i>m/z</i> | <i>z</i> | Abund    | Formula       | Ion |
|------------|----------|----------|---------------|-----|
| 252.1577   | 1        | 17356    |               |     |
| 256.2637   | 1        | 7563.25  |               |     |
| 266.1729   | 1        | 19038.55 |               |     |
| 274.2748   | 1        | 18567.64 |               |     |
| 318.3015   | 1        | 17317.53 |               |     |
| 340.2822   | 1        | 9012.65  |               |     |
| 362.3273   | 1        | 7766.96  |               |     |
| 384.3097   | 1        | 16316.96 |               |     |
| 428.3361   | 1        | 13562.52 |               |     |
| 565.2938   | 1        | 9991.42  | C35 H42 Na O5 | M+  |

### Formula Calculator Element Limits

| Element | Min | Max |
|---------|-----|-----|
| C       | 0   | 200 |
| H       | 0   | 400 |
| O       | 0   | 9   |
| Na      | 1   | 1   |

### Formula Calculator Results

| Formula       | CalculatedMass | Mz       | Diff. (mDa) | Diff. (ppm) | DBE  |
|---------------|----------------|----------|-------------|-------------|------|
| C35 H42 Na O5 | 565.2930       | 565.2938 | -0.8        | 1.4         | 14.5 |

--- End Of Report ---

**Figure S44.** HRESIMS of compound 2.

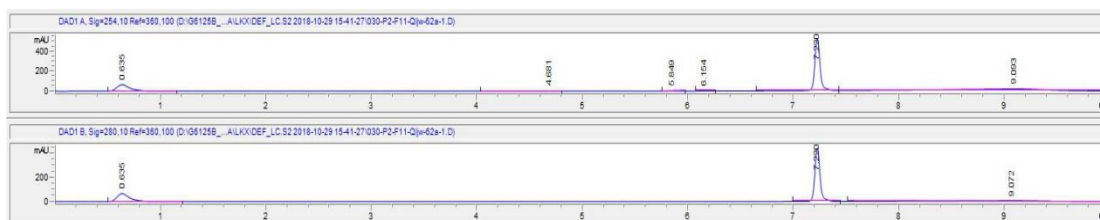

**Figure S45.** HPLC chromatogram of compound 2.

(Mobile phase: aqueous AcCN, 10%-100% within 10 min, flow rate 0.25 mL/min)

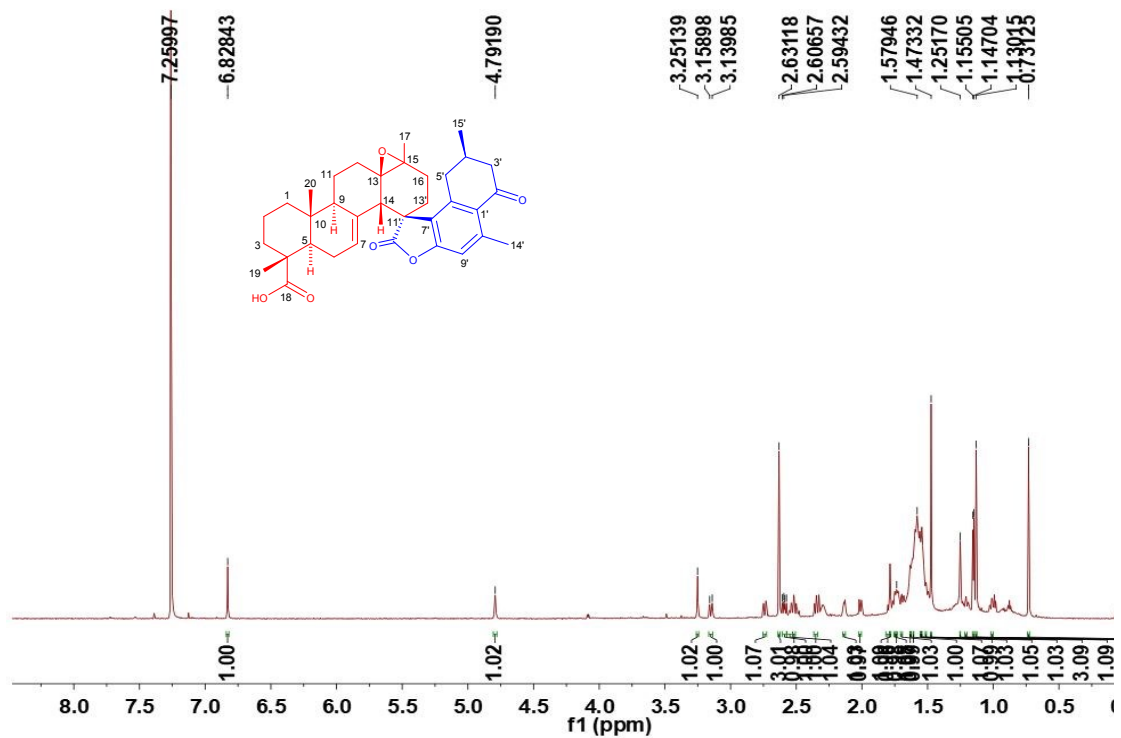

Figure S46.  $^1\text{H}$ NMR (800 MHz) spectrum of compound **3** in  $\text{CDCl}_3$ .

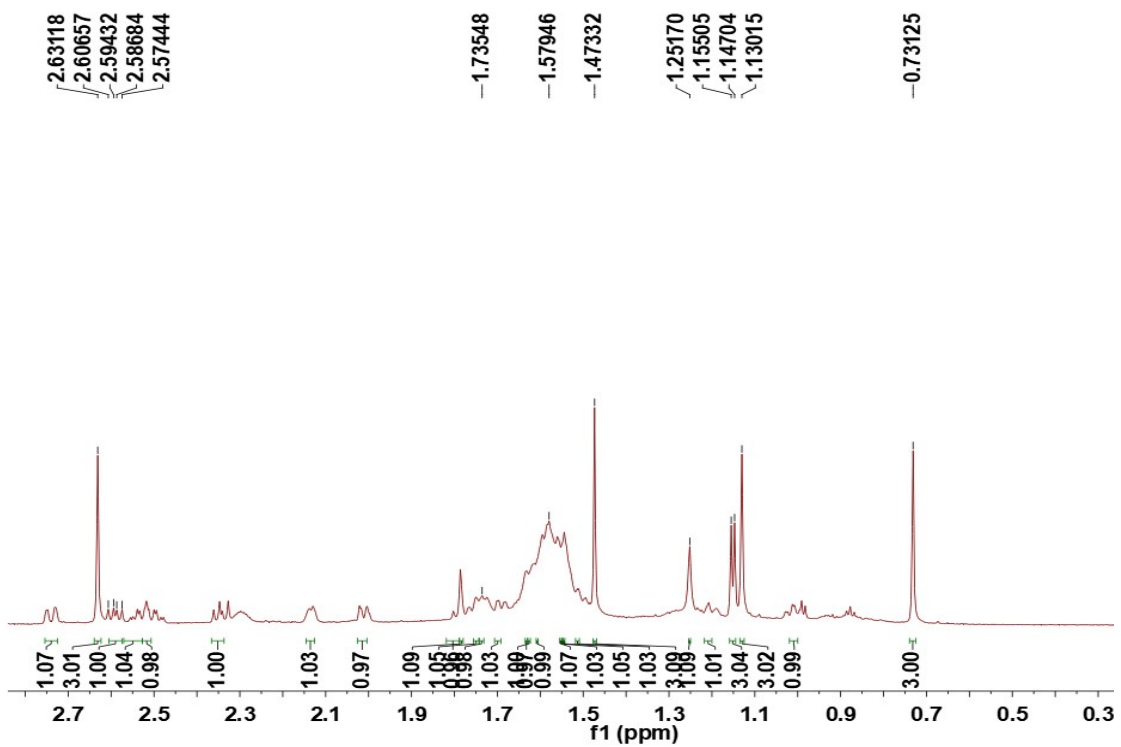

Figure S47. The part of  $^1\text{H}$ NMR (800 MHz) spectrum of compound **3** in  $\text{CDCl}_3$ .

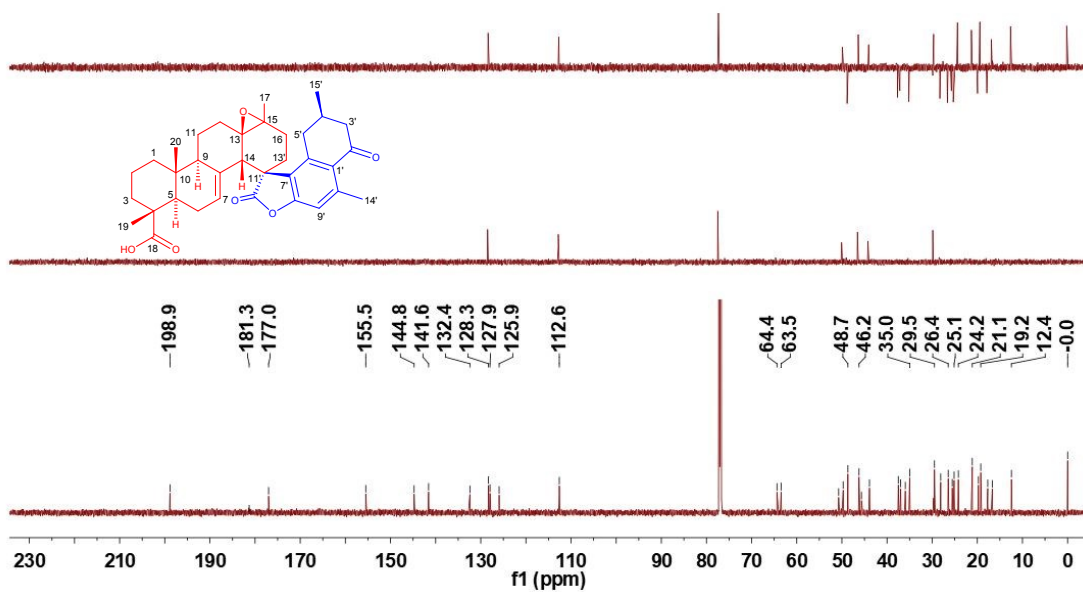

Figure S48.  $^{13}\text{C}$  NMR (200 MHz) and DEPT spectra of compound **3** in  $\text{CDCl}_3$ .

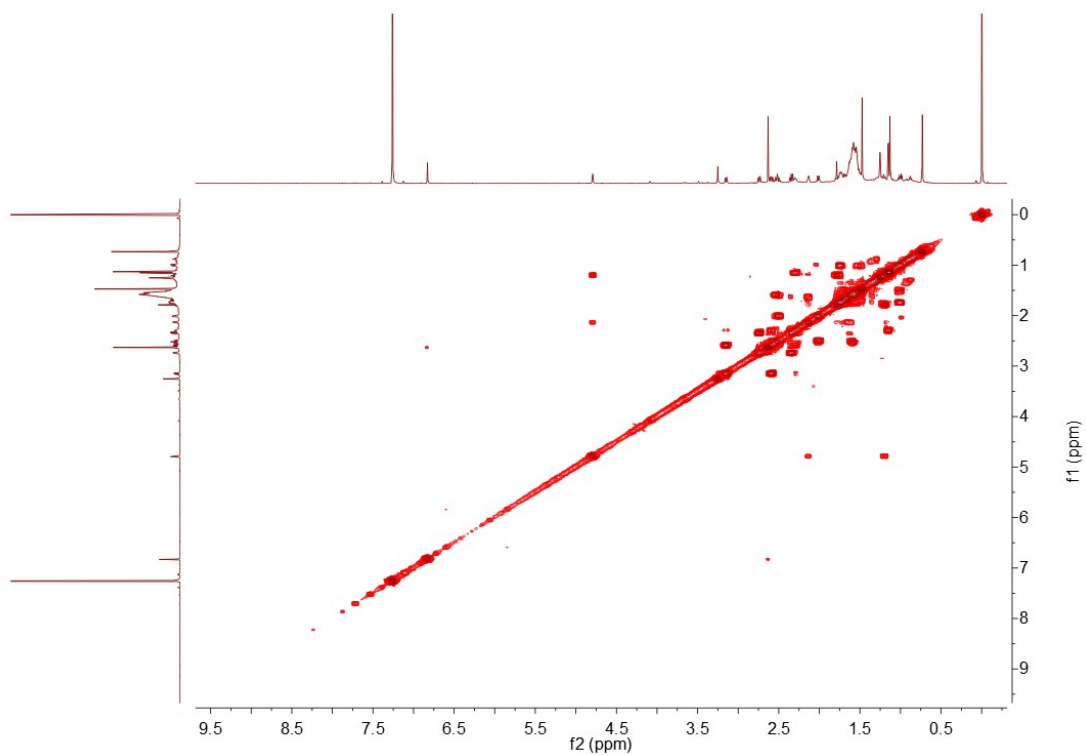

Figure S49.  $^1\text{H}$ - $^1\text{H}$  COSY spectrum of compound **3** in  $\text{CDCl}_3$ .

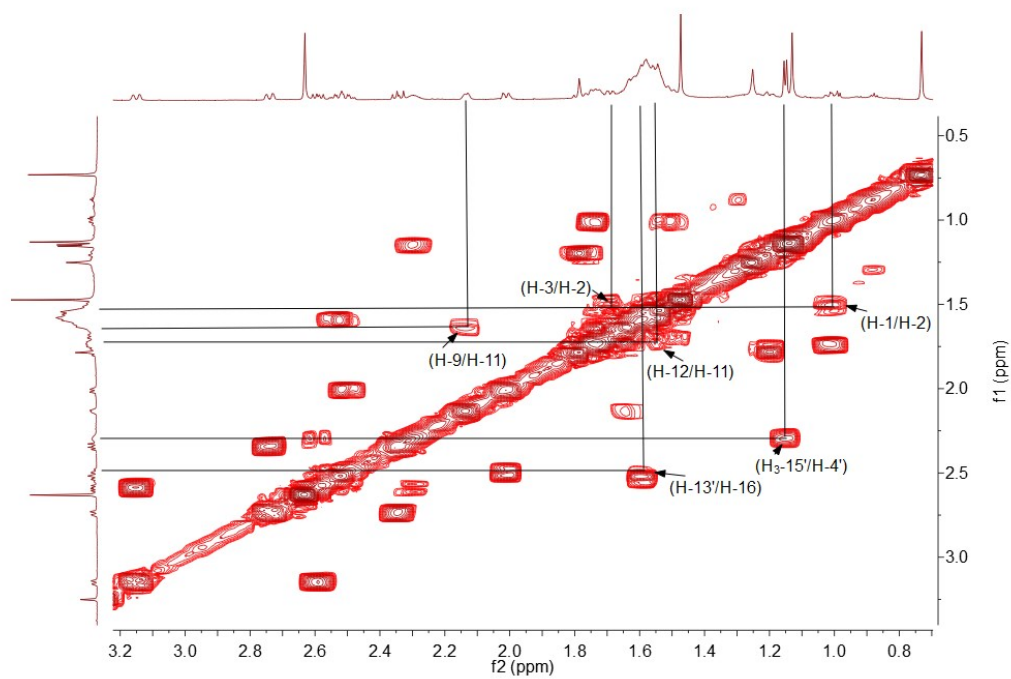

Figure S50. The part of  $^1\text{H}$ - $^1\text{H}$  COSY spectrum of compound **3** in  $\text{CDCl}_3$  (1).

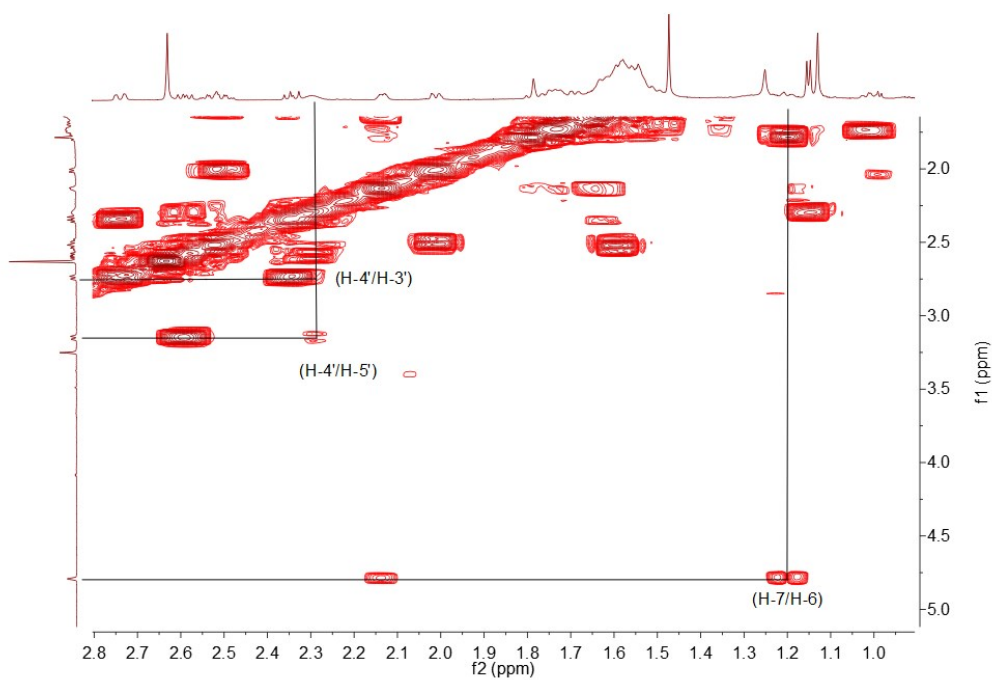

Figure S51. The part of  $^1\text{H}$ - $^1\text{H}$  COSY spectrum of compound **3** in  $\text{CDCl}_3$  (2).

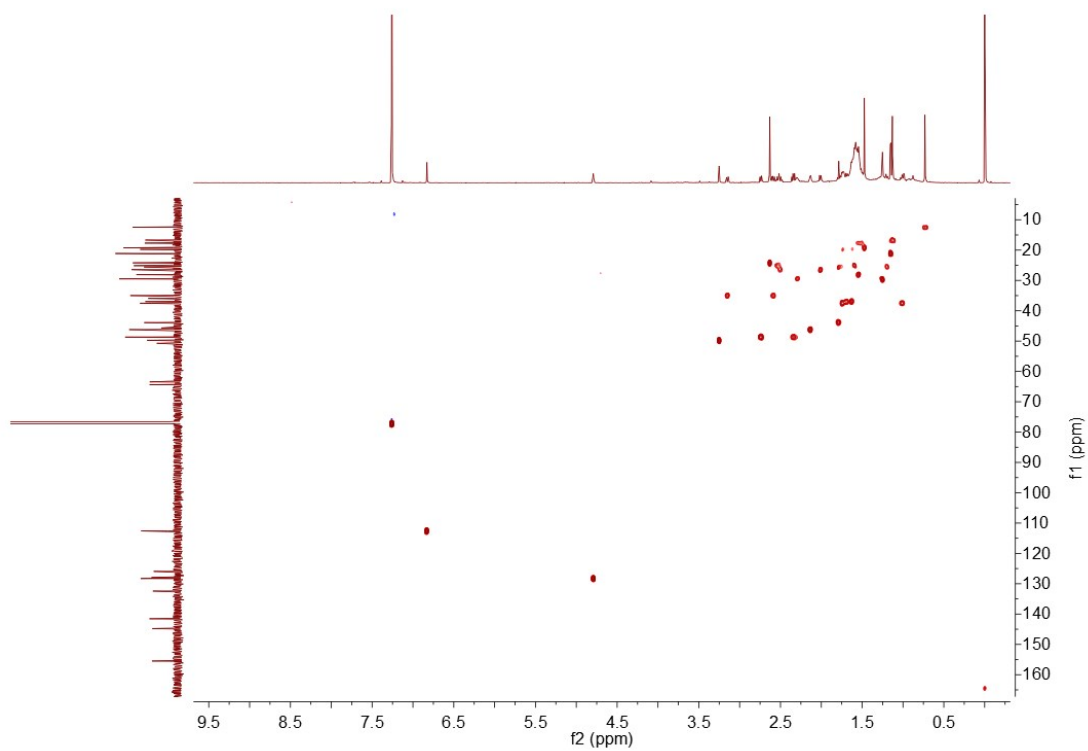

Figure S52. HSQC spectrum of compound **3** in  $\text{CDCl}_3$ .

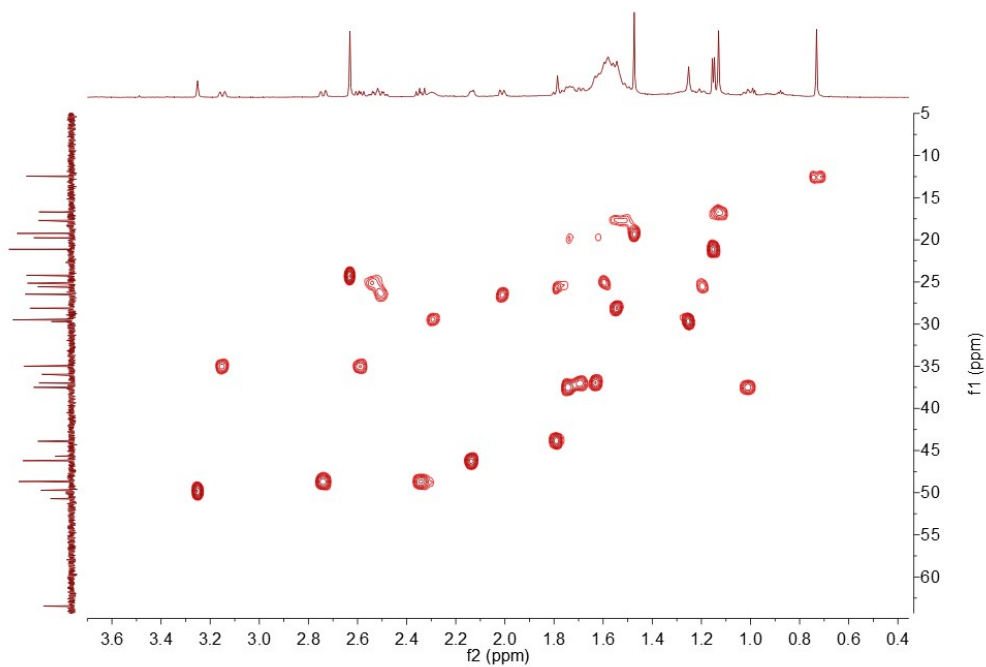

Figure S53. The part of HSQC spectrum of compound **3** in  $\text{CDCl}_3$ .

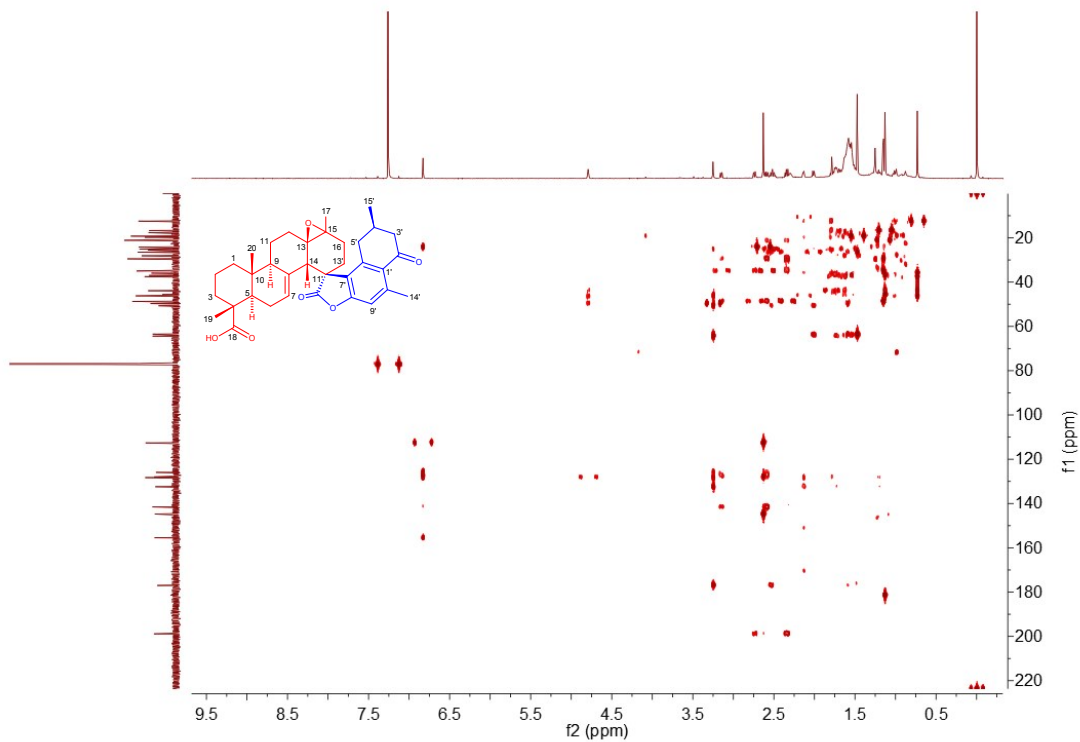

Figure S54. HMBC spectrum of compound **3** in  $\text{CDCl}_3$ .

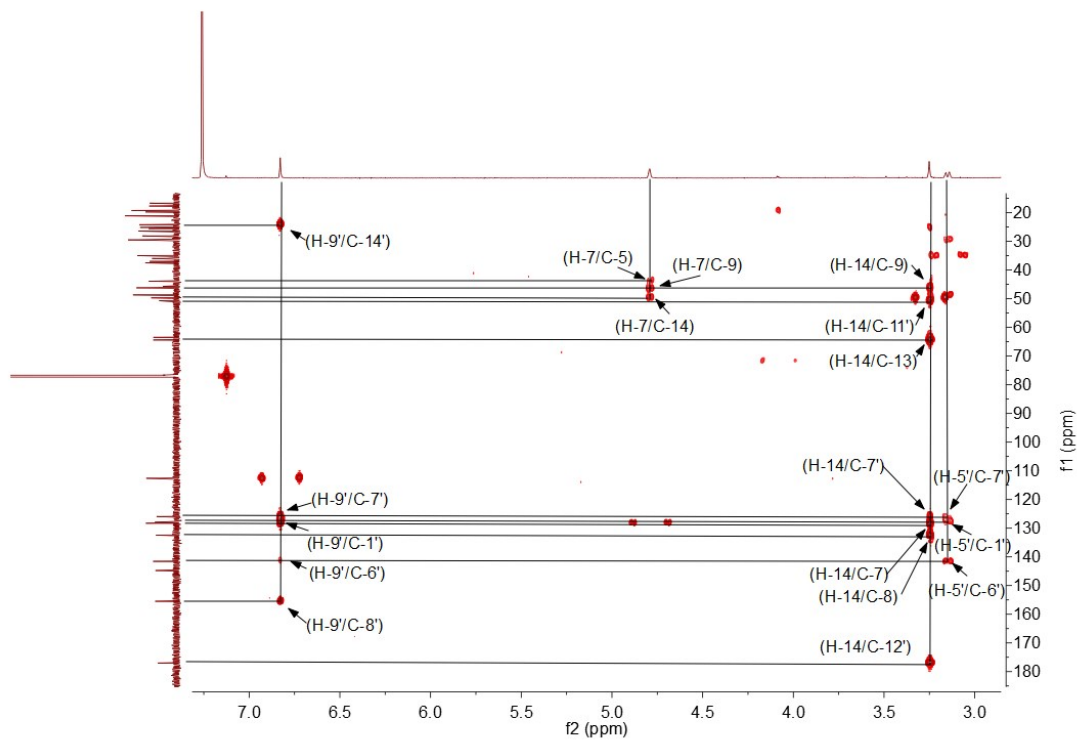

Figure S55. The part of HMBC spectrum of compound **3** in  $\text{CDCl}_3$  (1).

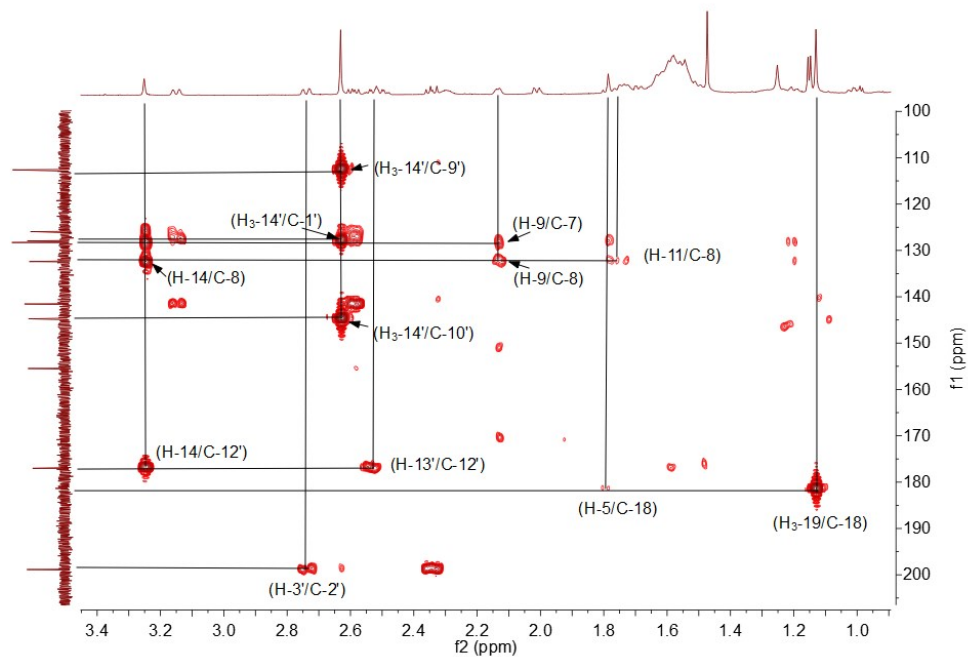

Figure S56. The part of HMBC spectrum of compound **3** in  $\text{CDCl}_3$  (2).

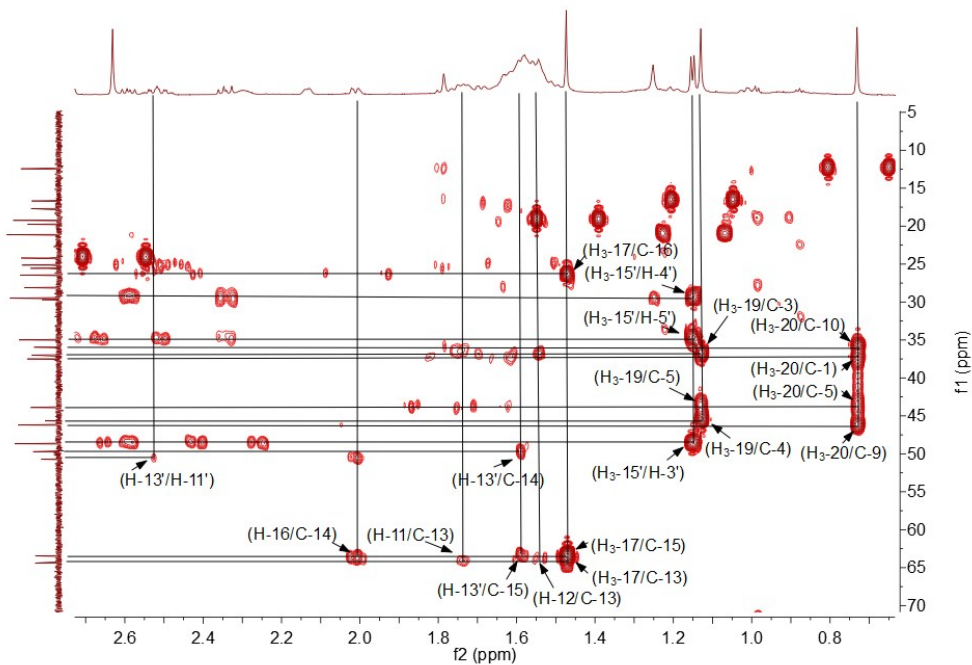

Figure S57. The part of HMBC spectrum of compound **3** in  $\text{CDCl}_3$  (3).



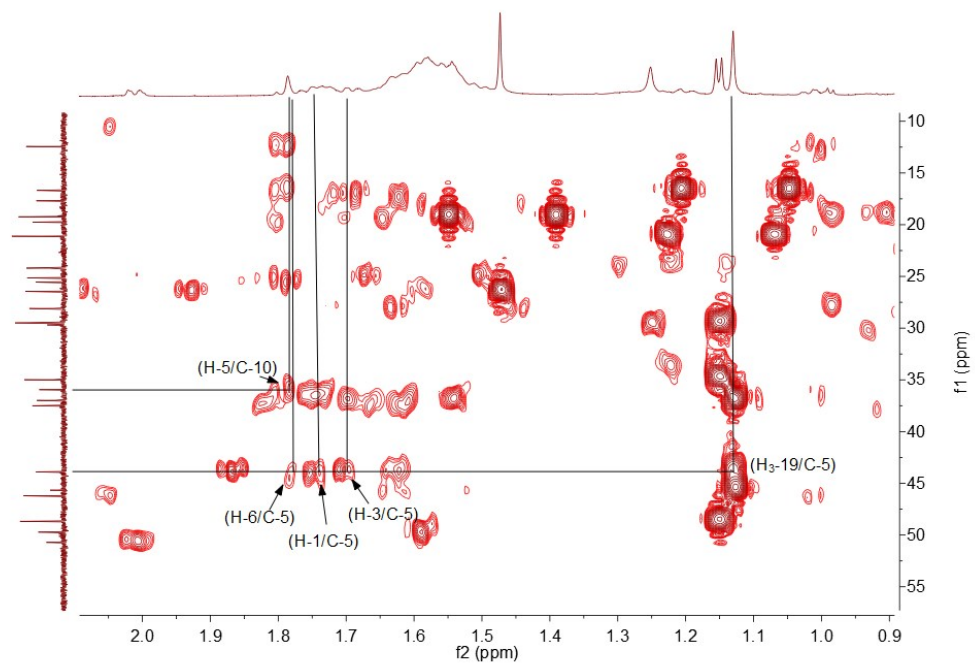

Figure S58. The part of HMBC spectrum of compound **3** in  $\text{CDCl}_3$  (**3**).

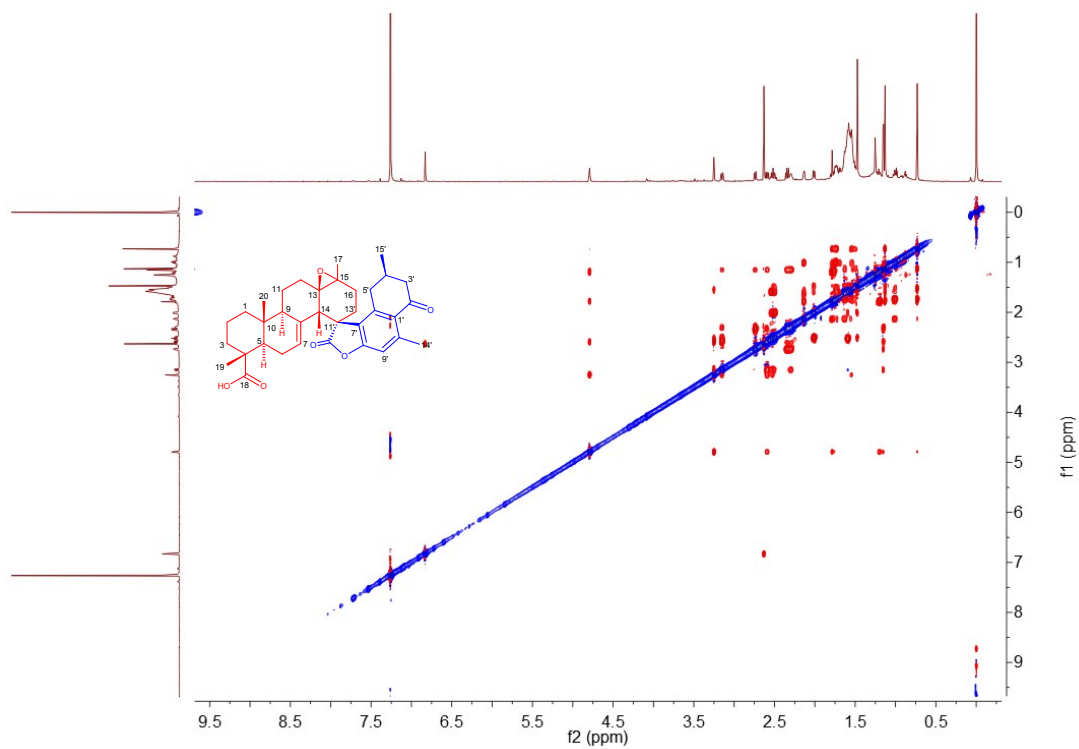

Figure S59. ROESY spectrum of compound **3** in  $\text{CDCl}_3$ .

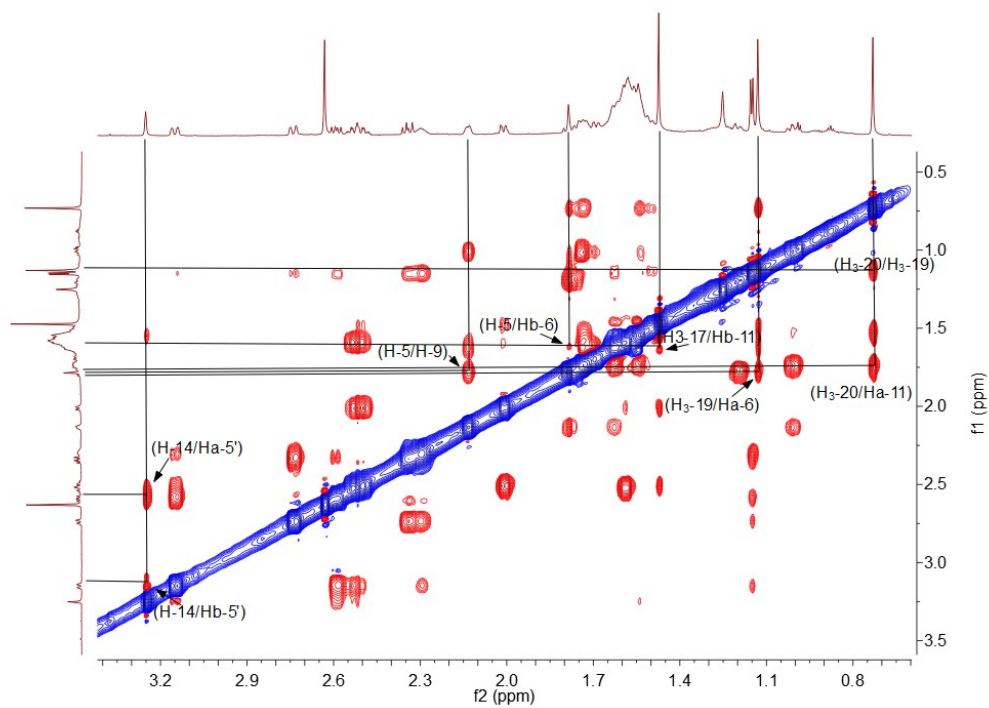

**Figure S60.** The part of ROESY spectrum of compound **3** in  $\text{CDCl}_3$  (1).

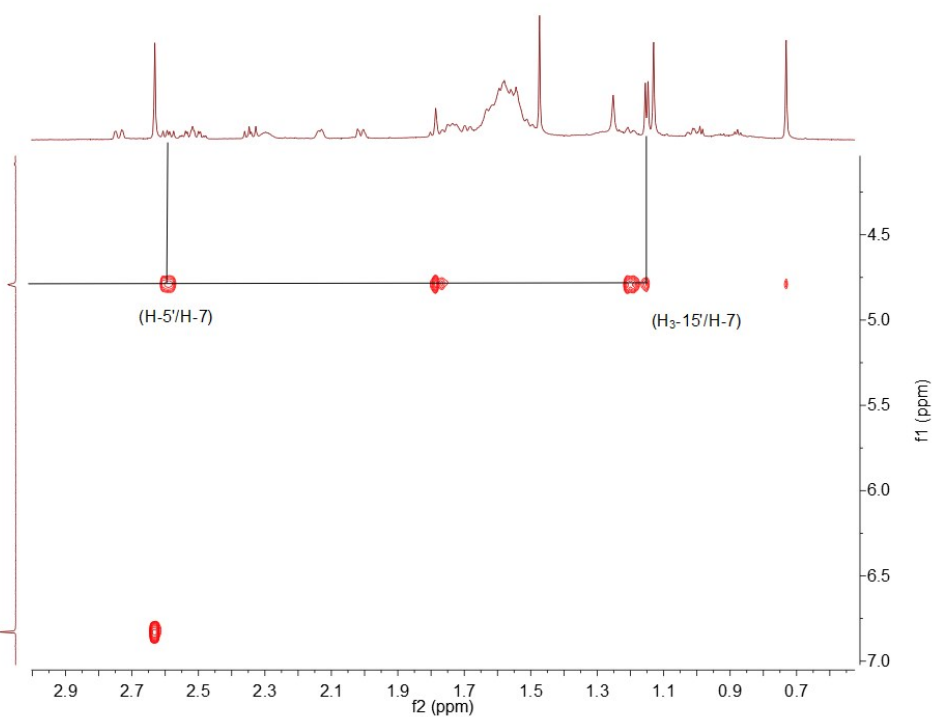

**Figure S61.** The part of ROESY spectrum of compound **3** in  $\text{CDCl}_3$  (2).

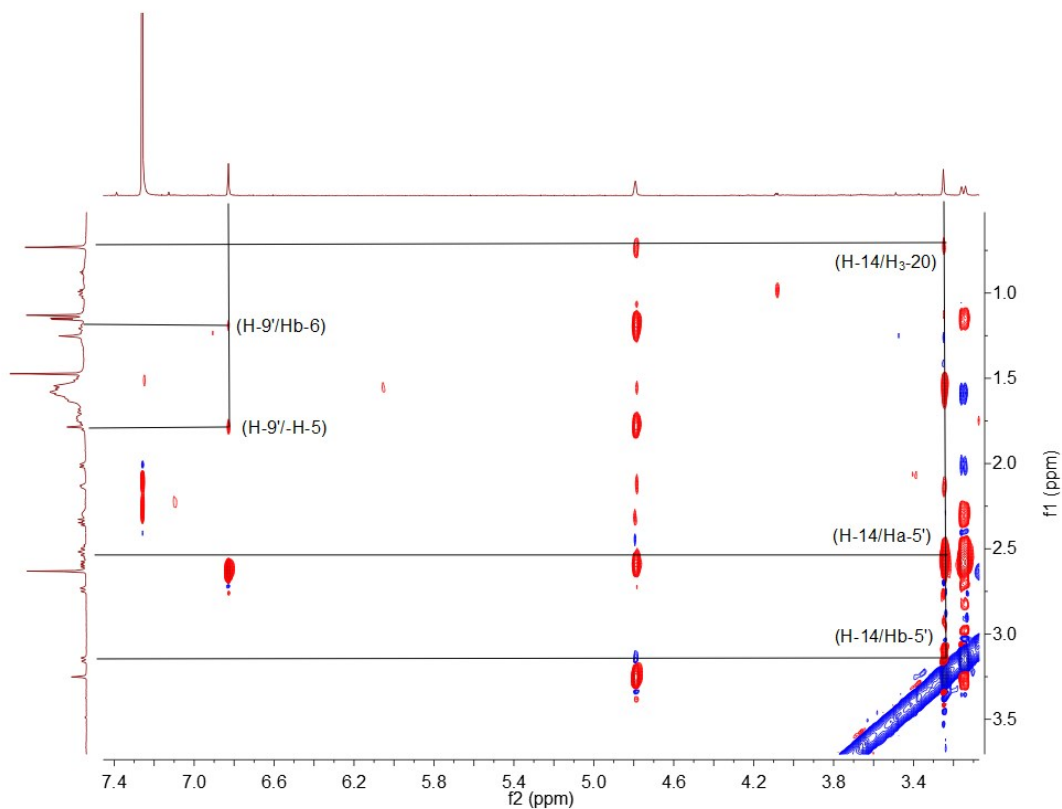

**Figure S62.** The part of ROESY spectrum of compound **3** in  $\text{CDCl}_3$  (3).

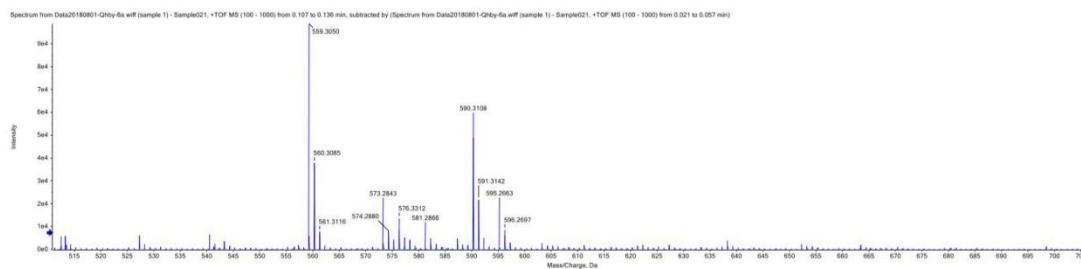

$[\text{M}+\text{H}]^+$   $m/z$  559.3050

| Hit | Formula                                | $m/z$    | RDB  | ppm  |
|-----|----------------------------------------|----------|------|------|
| 1   | $\text{C}_{35}\text{H}_{43}\text{O}_6$ | 559.3054 | 15.0 | -0.7 |

Elements from ~ to  $\text{C}_{60}\text{H}_{120}\text{O}_6$

Mass tolerance 5ppm

**Figure S63.** HRESIMS of compound **3**.

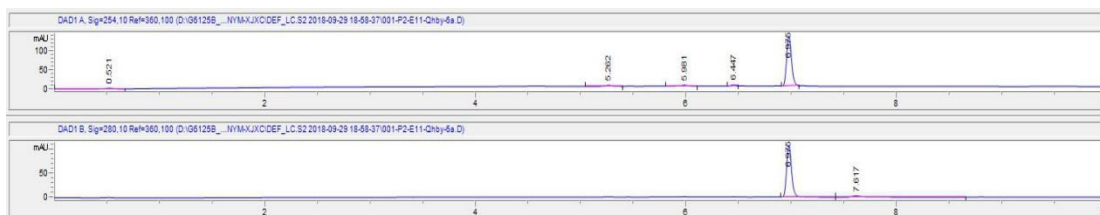

**Figure S64.** HPLC chromatogram of compound **3**.

(Mobile phase: aqueous  $\text{AcCN}$ , 10%-100% within 10 min, flow rate 0.25 mL/min)

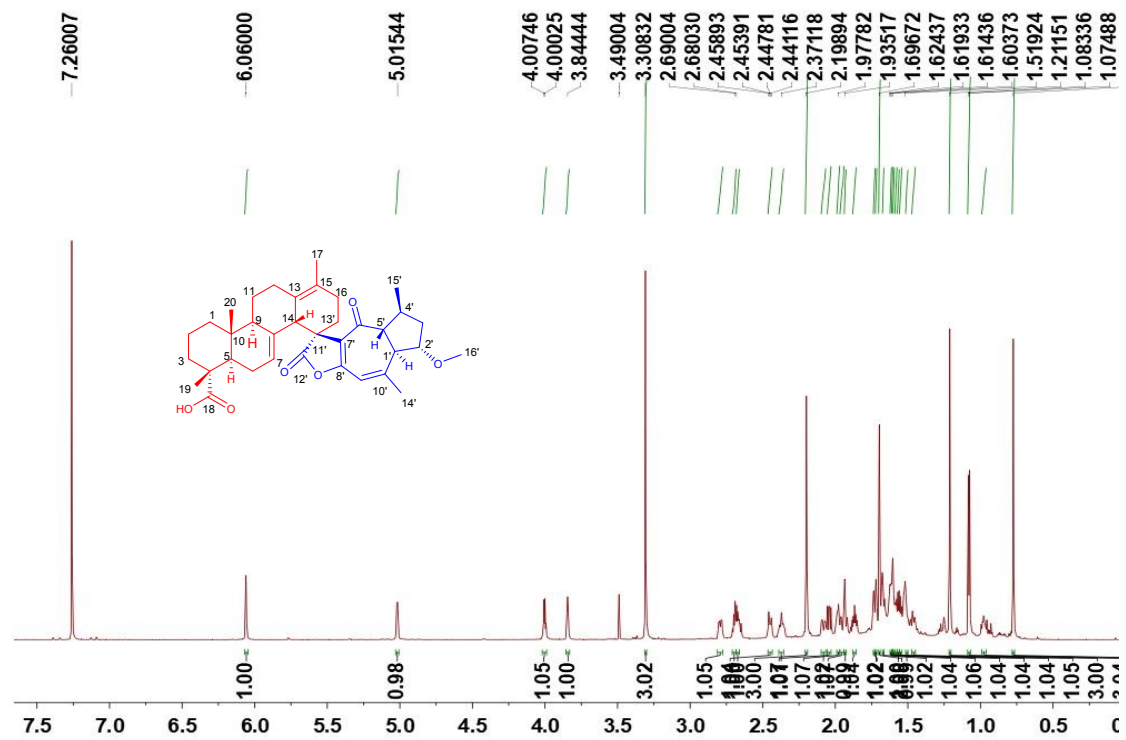

Figure S65. <sup>1</sup>H NMR (800 MHz) spectrum of compound 4 in CDCl<sub>3</sub>.

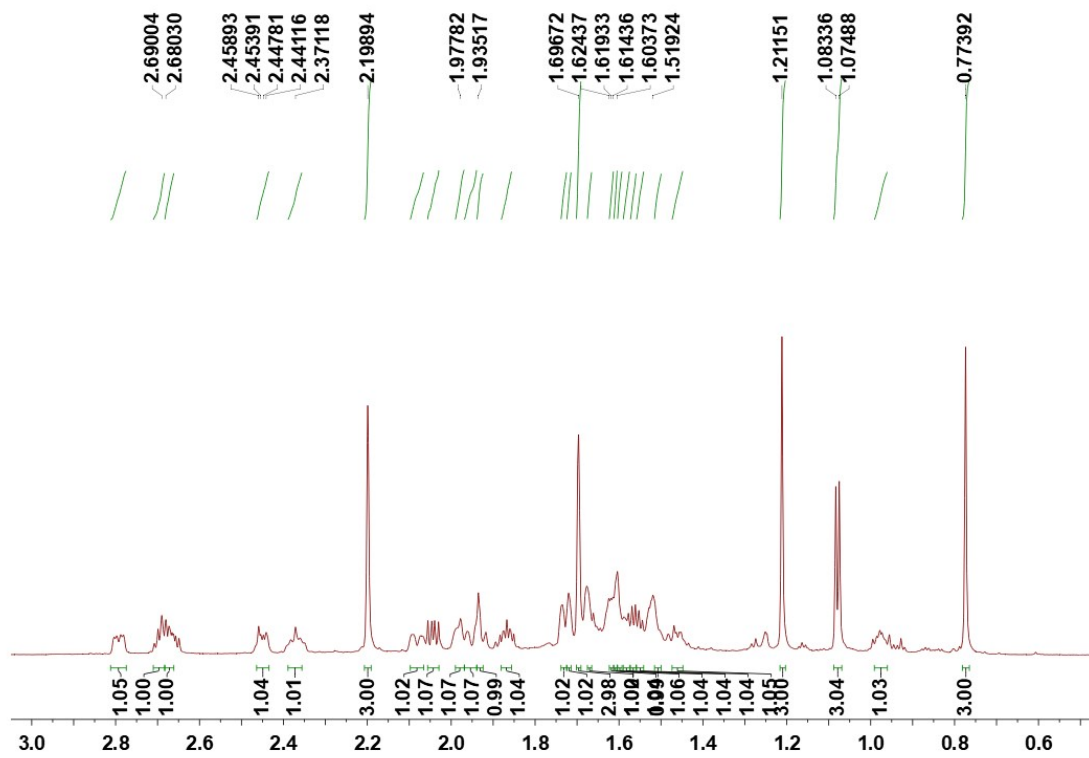

Figure S66. <sup>1</sup>H NMR (800 MHz) spectrum of compound 4 in CDCl<sub>3</sub>.

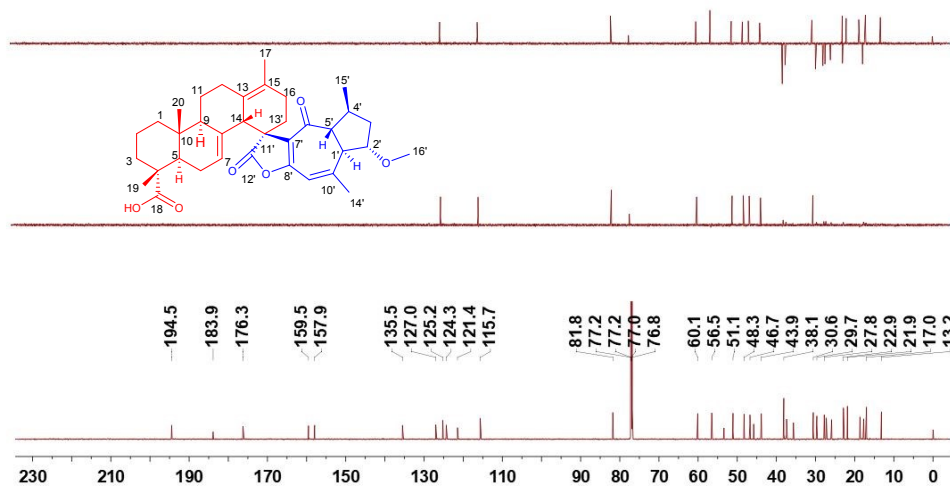

Figure S67.  $^{13}\text{C}$  NMR (200 MHz) and DEPT spectra of compound **4** in  $\text{CDCl}_3$ .

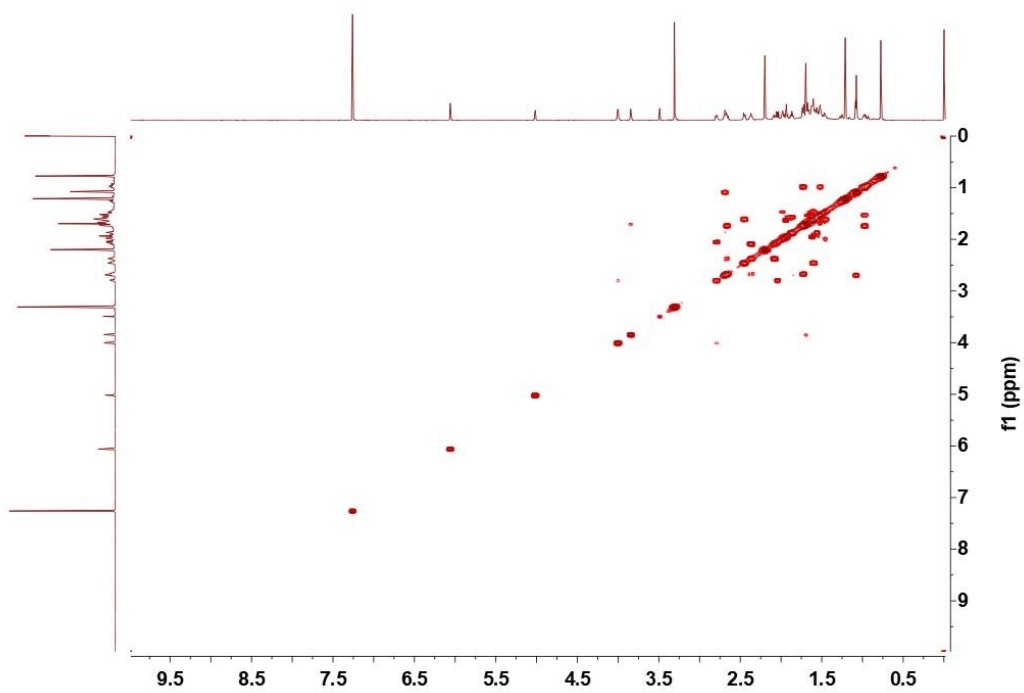

Figure S68.  $^1\text{H}$ - $^1\text{H}$  COSY spectrum of compound **4** in  $\text{CDCl}_3$ .

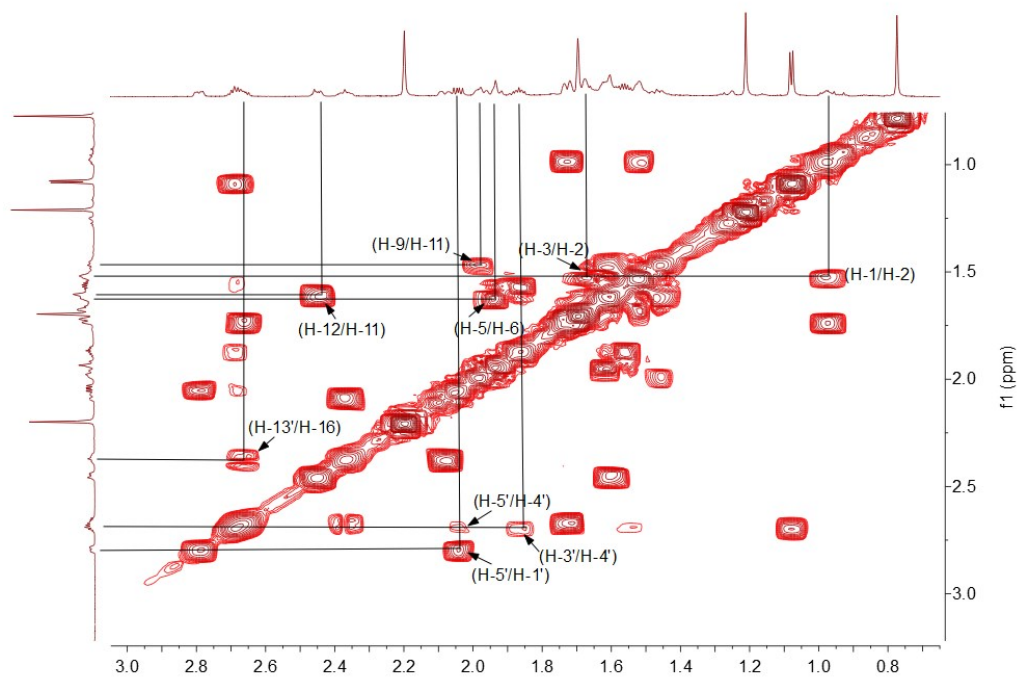

**Figure S69.** The part of  $^1\text{H}$ - $^1\text{H}$  COSY spectrum of compound **4** in  $\text{CDCl}_3$  (1).

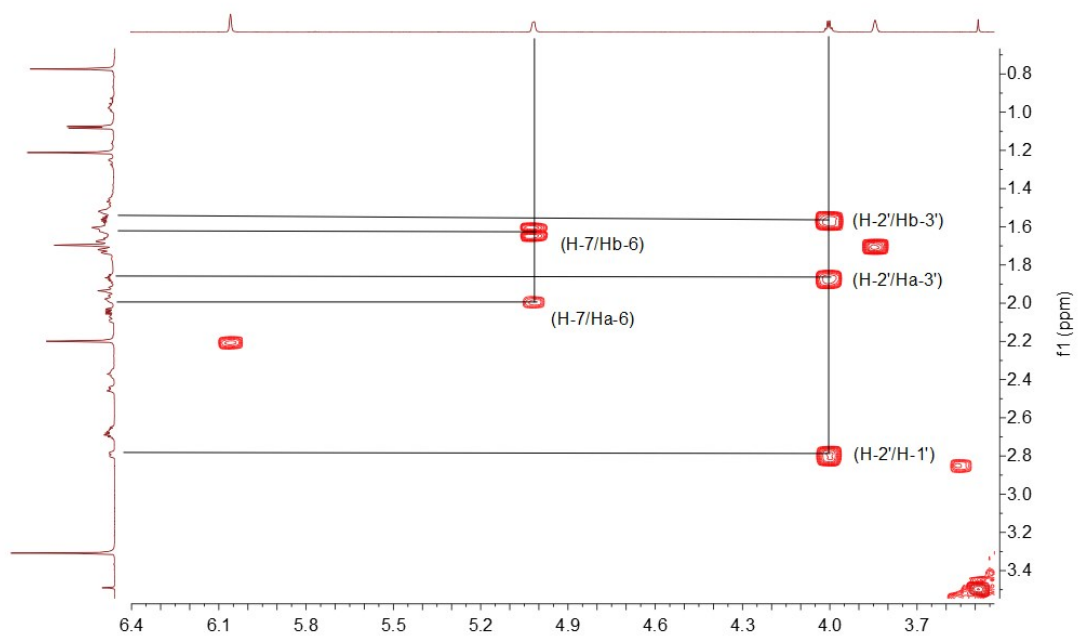

**Figure S70.** The part of  $^1\text{H}$ - $^1\text{H}$  COSY spectrum of compound **4** in  $\text{CDCl}_3$  (2).

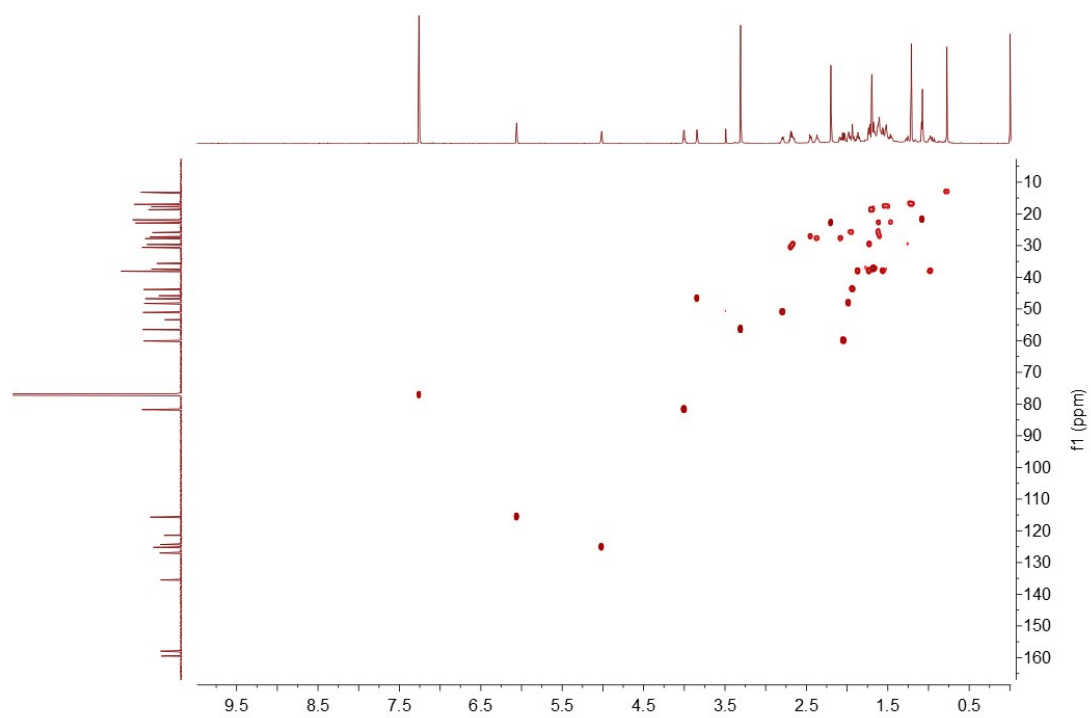

Figure S71. HSQC spectrum of compound 4 in CDCl<sub>3</sub>.

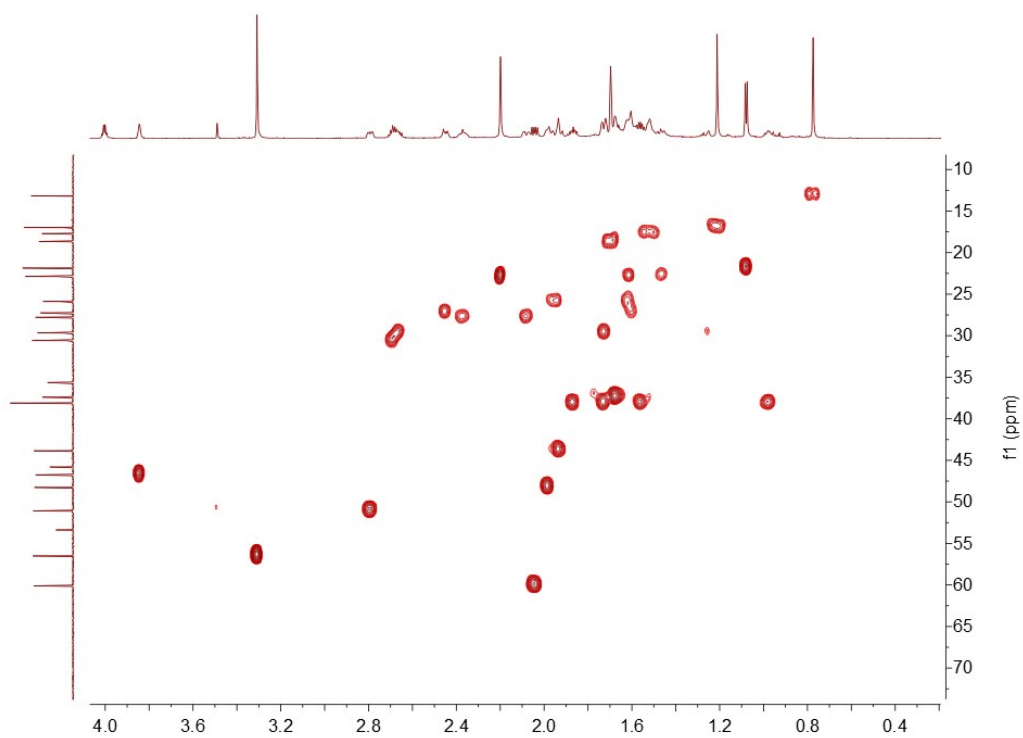

Figure S72. The part of HSQC spectrum of compound 4 in CDCl<sub>3</sub>.

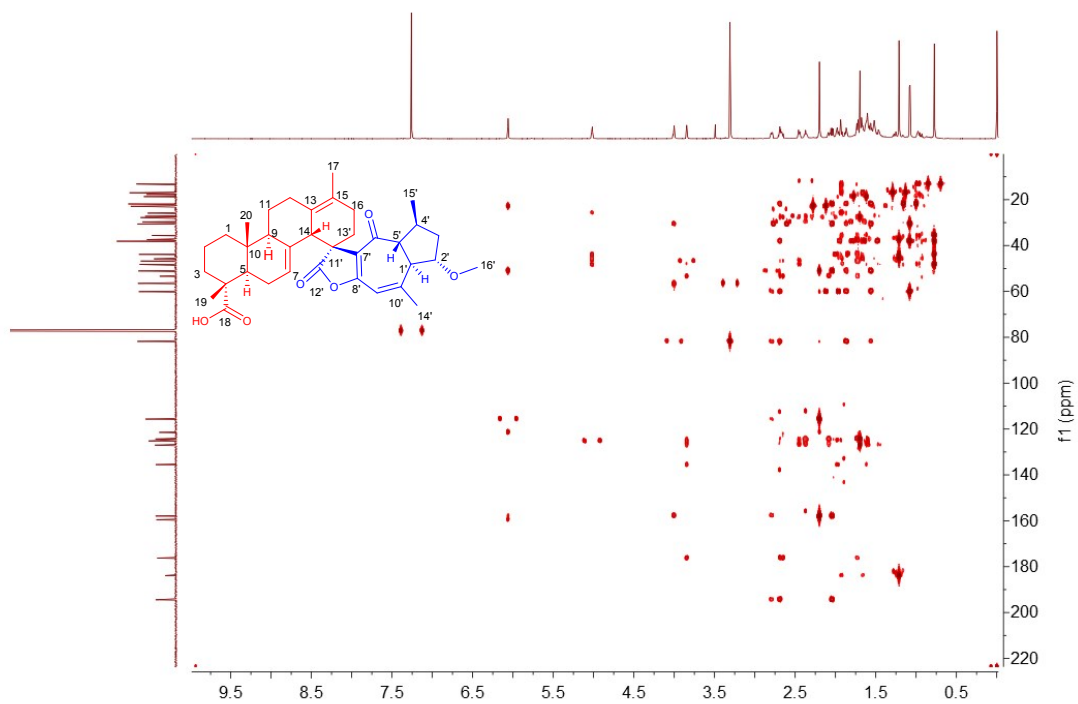

Figure S73. HMBC spectrum of compound **4** in  $\text{CDCl}_3$ .

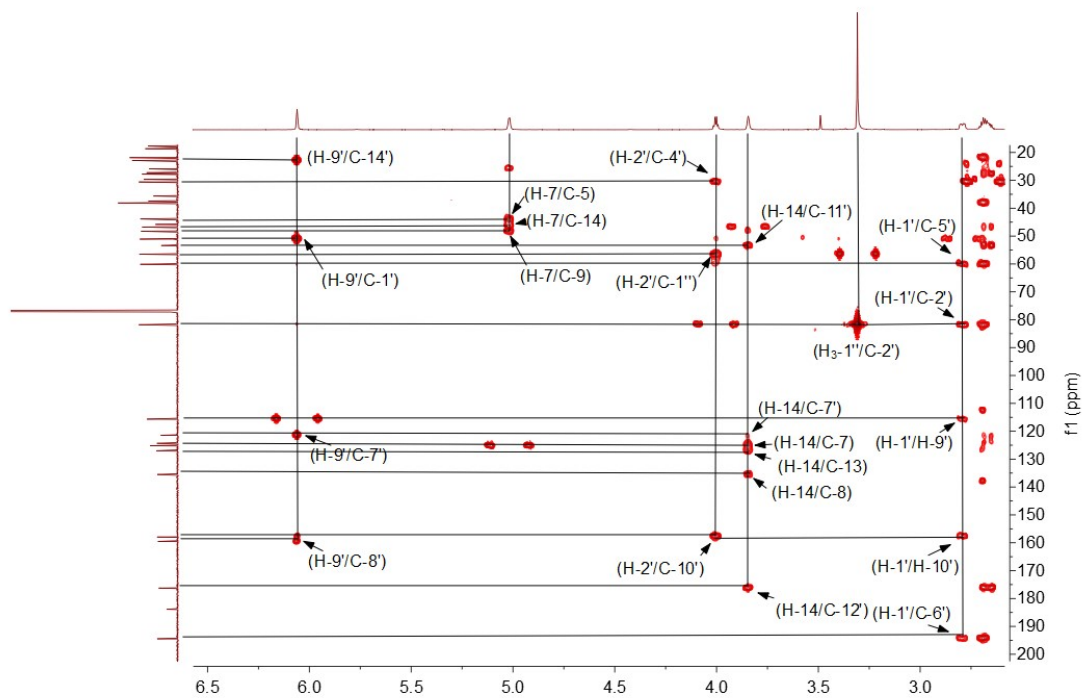

Figure S74. The part of HMBC spectrum of compound **4** in  $\text{CDCl}_3$  (1).



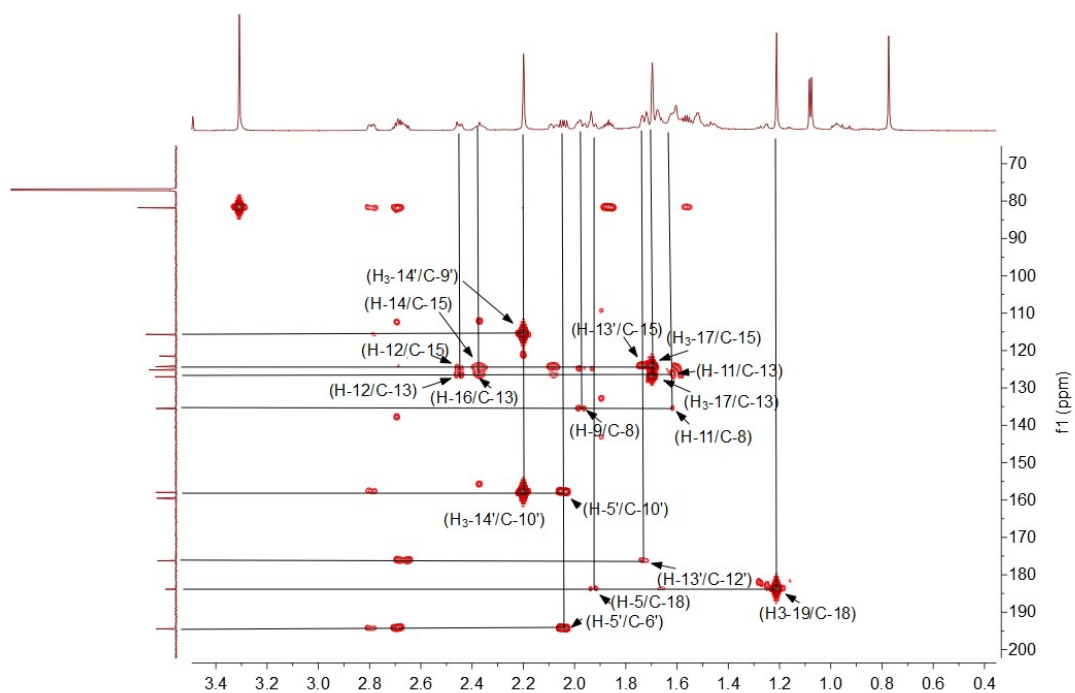

**Figure S75.** The part of HMBC spectrum of compound **4** in  $\text{CDCl}_3$  (2).

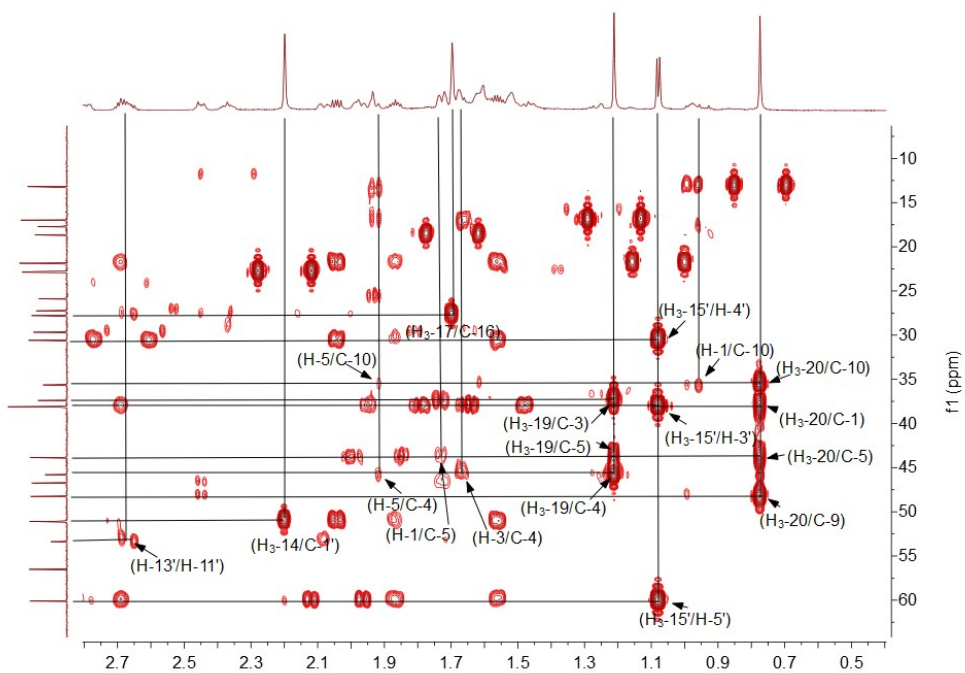

**Figure S76.** The part of HMBC spectrum of compound **4** in  $\text{CDCl}_3$  (3).

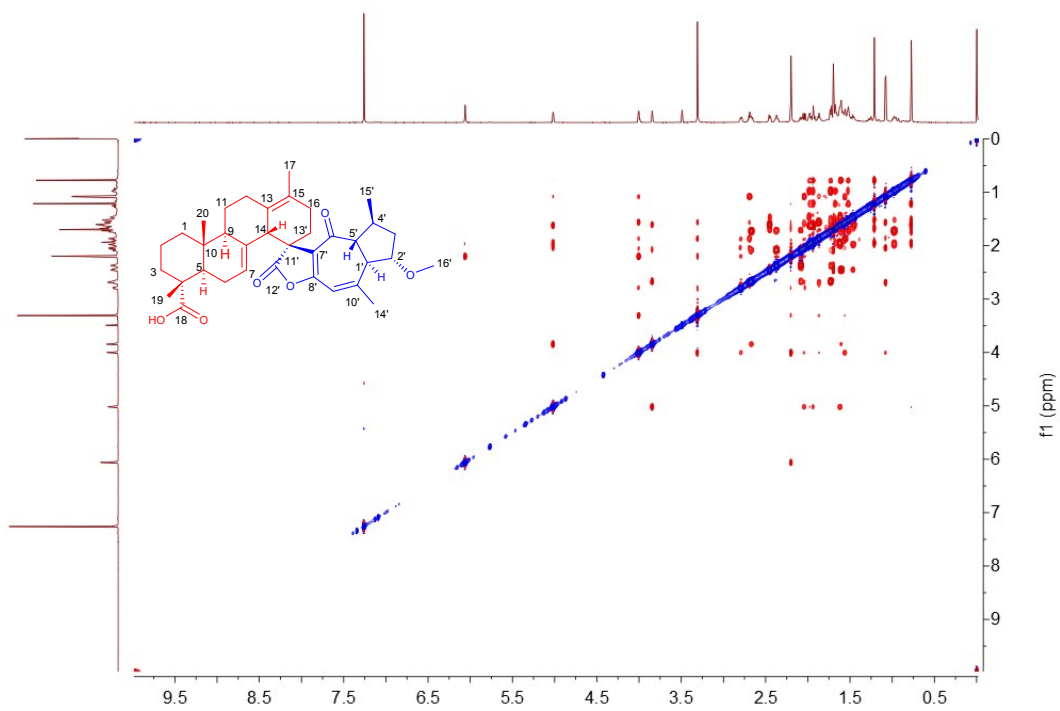

**Figure S77.** ROESY spectrum of compound **4** in  $\text{CDCl}_3$ .

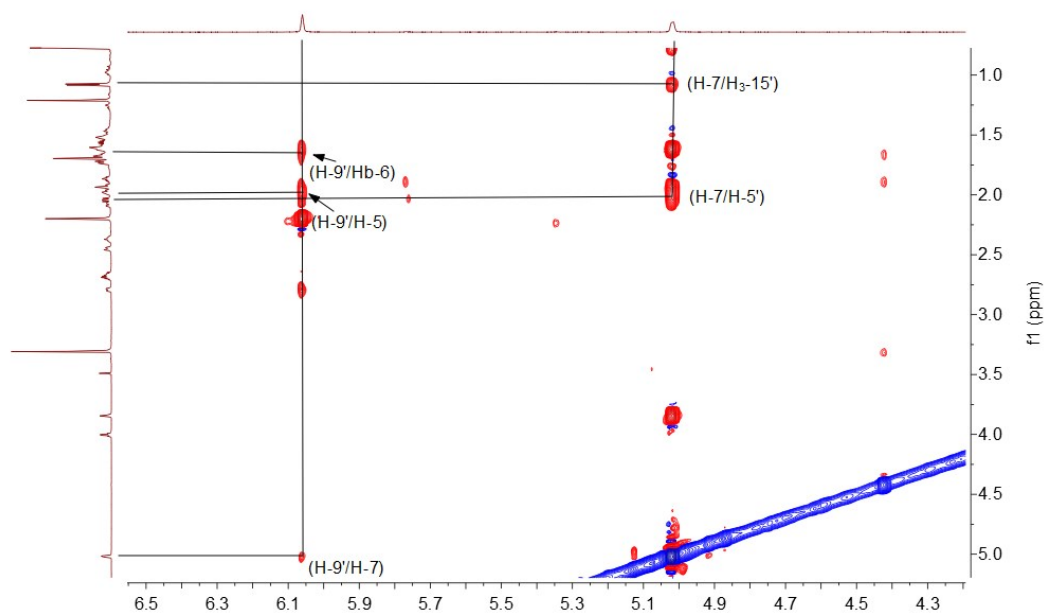

**Figure S78.** The part of ROESY spectrum of compound **4** in  $\text{CDCl}_3$  (1).

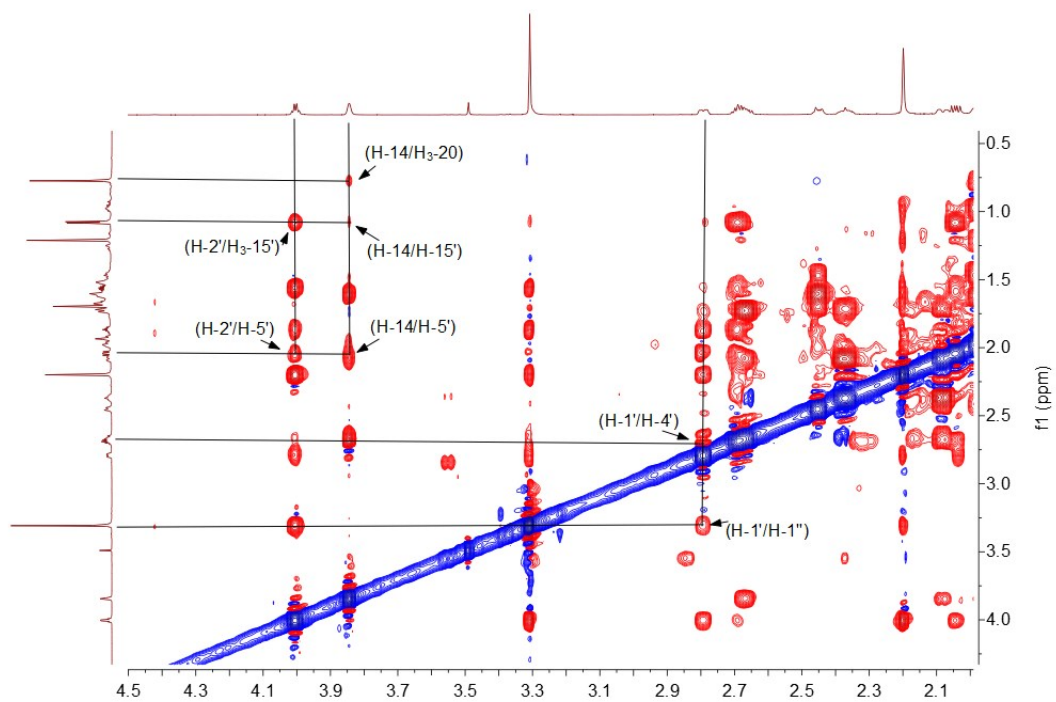

**Figure S79.** The part of ROESY spectrum of compound **4** in  $\text{CDCl}_3$  (2).

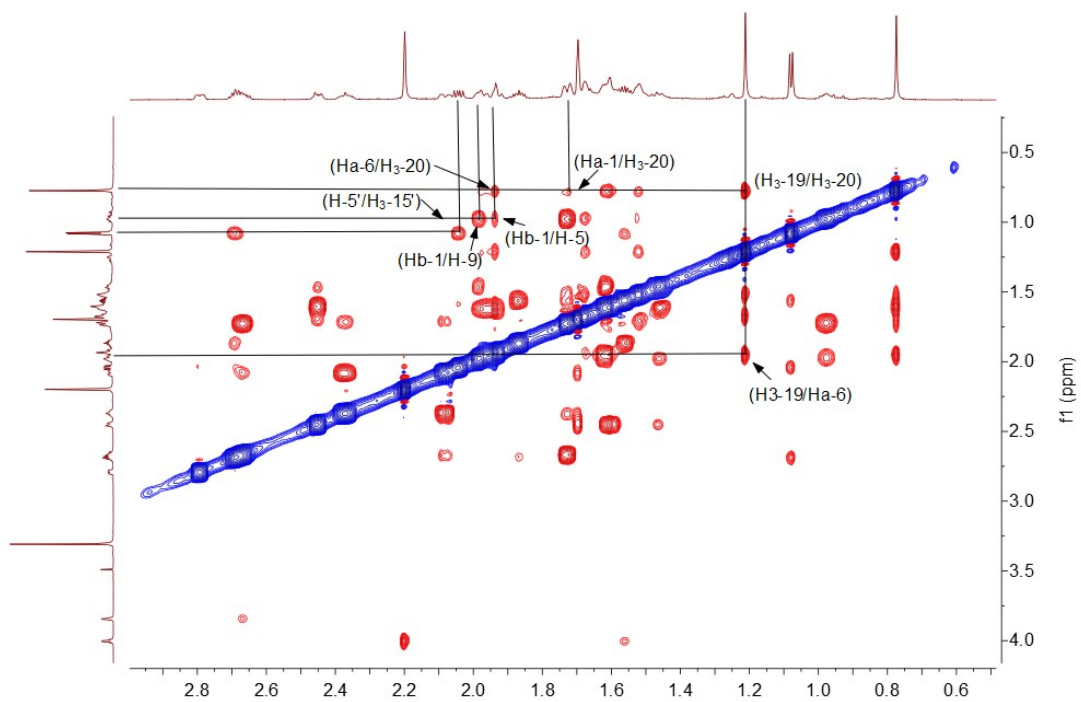

**Figure S80.** The part of ROESY spectrum of compound **4** in  $\text{CDCl}_3$  (3).

## Qualitative Analysis Report

|                               |                      |                      |                       |
|-------------------------------|----------------------|----------------------|-----------------------|
| <b>Data Filename</b>          | 170829ESIA6.d        | <b>Sample Name</b>   | qjw-63c               |
| <b>Sample Type</b>            | Sample               | <b>Position</b>      |                       |
| <b>Instrument Name</b>        | Agilent G6230 TOF MS | <b>User Name</b>     | KIB                   |
| <b>Acq Method</b>             | ESI.m                | <b>Acquired Time</b> | 8/29/2017 11:22:26 AM |
| <b>IRM Calibration Status</b> | Success              | <b>DA Method</b>     | ESI.m                 |
| <b>Comment</b>                |                      |                      |                       |

|                               |                                                        |
|-------------------------------|--------------------------------------------------------|
| <b>Sample Group</b>           | <b>Info.</b>                                           |
| <b>Acquisition SW Version</b> | 6200 series TOF/6500 series<br>Q-TOF B.05.01 (B5125.2) |

### User Spectra

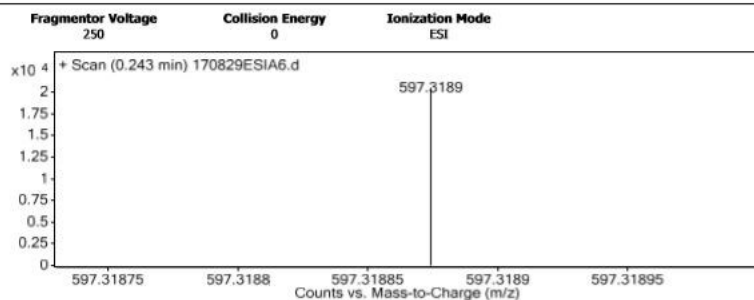

### Peak List

| <i>m/z</i> | <i>z</i> | Abund    | Formula       | Ion |
|------------|----------|----------|---------------|-----|
| 122.5479   | 2        | 7905.75  |               |     |
| 166.0623   | 1        | 5976.23  |               |     |
| 252.1567   |          | 4302.95  |               |     |
| 274.274    | 1        | 16218.55 |               |     |
| 318.3004   | 1        | 8840.74  |               |     |
| 575.3364   | 1        | 5245.28  |               |     |
| 597.3189   | 1        | 20423.11 | C36 H46 Na O6 | M+  |
| 598.3215   | 1        | 6824.93  | C36 H46 Na O6 | M+  |
| 613.308    | 1        | 6282.66  |               |     |
| 629.3081   | 1        | 8627.95  |               |     |

### Formula Calculator Element Limits

| Element | Min | Max |
|---------|-----|-----|
| C       | 0   | 200 |
| H       | 0   | 400 |
| O       | 2   | 9   |
| Na      | 1   | 1   |

### Formula Calculator Results

| Formula       | CalculatedMass | Mz       | Diff.(mDa) | Diff. (ppm) | DBE  |
|---------------|----------------|----------|------------|-------------|------|
| C36 H46 Na O6 | 597.3192       | 597.3189 | 0.3        | 0.5         | 13.5 |

--- End Of Report ---

Figure S81. HRESIMS of compound 4.
